# Supplementary material for: Systematic analysis of NAC transcription factors in Gossypium barbadense uncovers their roles in response to Verticillium wilt
Source: PeerJ. 2019 Nov 5;7:e7995. doi: 10.7717/peerj.7995 (PMC6839521; doi:10.7717/peerj.7995)
Supplement: Table S1 [file peerj-07-7995-s004.xlsx]

## Sheet: Sheet1
Table S1 Primers for qPCR used in this study
Gene ID	Forward primer (5'-3')	Reverse primer (5'-3')
GbNAC003	ACTGAACTCCGACGAGCAAGTG	GTTGGCATGTTCGGTTGCATGT
GbNAC010	AGAATTCAGCTTGTGCCGGGTT	CCATCTTTACTATCCCTGGCGGC
GbNAC014	CGACAGCTACGGCGATTGGTAA	TCATGAATTCCCGAGACACCGC
GbNAC023	CGGTGTCAGGGTATTGGAAGGC	GGTGGCTTGCCCTTGTAGAACA
GbNAC137	CGCCTCTCACACAACCCTAACC	GCGGCAAAGAACCCAATCATCC
GbNAC140	ACTGAACTCCGACGAGCAAGTG	GTTGGCATGTTCGGTTGCATGT
GbNAC147	AGAATTCAGCTTGTGCCGGGTT	CCATCTTTACTATCCCTGGCGGC
GbNAC152	GGTCCAATTTCCCAACTTTTGGGTG	TGGTCACCTGTGGTATTACTGGC
GbNAC164	GCCGGCAAGAAAAGCAACAACT	CCAACTCGACTCCGAACCATCC
GbNAC165	CATGAAGGAGGCCGAAGACGAA	CATGTTCCCGCTTCTGGCTGTA
GbNAC186	TCAGCCTTGCCAAGTTTTAGCCA	TTTGAGCTGGAAGAGACTGCGA
GbNAC188	AGCTACTGGGATCGACAAGCCT	GGCAAGTTGTCCTTGTTGGTGC
GbNAC215	ACTTGAAGCCCAAGCTGCTGAA	GGATCTTATCAGCTCCGGTGGC
GbNAC248	TTTCCTGGCAGACAACCAGTGC	GCTCAACTGGGGAAGCTTTTGC
GbNAC270	ACAGAACCCTAACCCCAACTCCA	GCGGCAAAGAACCCAATCATCC
GbActin	GATTCCGTTGTCCAGAAGTCCT	TACGGTCTGCAATACCAGGGA
