# Supplementary material for: Systematic analysis of NAC transcription factors in Gossypium barbadense uncovers their roles in response to Verticillium wilt
Source: PeerJ. 2019 Nov 5;7:e7995. doi: 10.7717/peerj.7995 (PMC6839521; doi:10.7717/peerj.7995)
Supplement: Table S4 [file peerj-07-7995-s007.xlsx]

## Sheet: G. barbadense-Arabidopsis
Supplementary Table S4 Synteny analysis between Gossypium barbadense and Arabidopsis thaliana
GbNAC Gene	GbNAC Gene ID	AtNAC Gene ID
GbNAC001	Gbar_A01G000010.1	AT2G17040.1
GbNAC005	Gbar_A01G005190.1	AT3G15170.1
GbNAC005	Gbar_A01G005190.1	AT5G53950.1
GbNAC006	Gbar_A01G005760.1	AT3G15500.1
GbNAC007	Gbar_A01G005770.1	AT3G15510.1
GbNAC008	Gbar_A01G009360.1	AT1G76420.1
GbNAC013	Gbar_A02G006260.1	AT1G34190.1
GbNAC016	Gbar_A02G010420.1	AT2G46770.1
GbNAC017	Gbar_A02G018140.1	AT2G18060.1
GbNAC017	Gbar_A02G018140.1	AT4G36160.1
GbNAC017	Gbar_A02G018140.1	AT5G66300.1
GbNAC019	Gbar_A03G000700.1	AT1G32510.1
GbNAC019	Gbar_A03G000700.1	AT4G17980.1
GbNAC019	Gbar_A03G000700.1	AT5G46590.1
GbNAC020	Gbar_A03G001580.1	AT1G12260.1
GbNAC020	Gbar_A03G001580.1	AT1G62700.1
GbNAC022	Gbar_A03G011370.1	AT1G26870.1
GbNAC023	Gbar_A03G011530.1	AT1G69490.1
GbNAC024	Gbar_A03G016800.1	AT5G13180.1
GbNAC028	Gbar_A04G002530.1	AT1G52880.1
GbNAC029	Gbar_A04G002550.1	AT1G52890.1
GbNAC038	Gbar_A05G007660.1	AT2G27300.1
GbNAC038	Gbar_A05G007660.1	AT3G44290.1
GbNAC038	Gbar_A05G007660.1	AT5G22290.1
GbNAC039	Gbar_A05G015790.1	AT1G28470.1
GbNAC040	Gbar_A05G016230.1	AT1G61110.1
GbNAC045	Gbar_A05G037020.1	AT5G39820.1
GbNAC051	Gbar_A06G004620.1	AT1G77450.1
GbNAC052	Gbar_A06G007180.1	AT4G29230.1
GbNAC052	Gbar_A06G007180.1	AT5G56620.1
GbNAC053	Gbar_A06G011380.1	AT2G24430.1
GbNAC062	Gbar_A07G011620.1	AT3G44350.1
GbNAC062	Gbar_A07G011620.1	AT5G22380.1
GbNAC064	Gbar_A07G014170.1	AT2G46770.1
GbNAC064	Gbar_A07G014170.1	AT3G61910.1
GbNAC073	Gbar_A08G017280.1	AT1G32510.1
GbNAC073	Gbar_A08G017280.1	AT4G17980.1
GbNAC073	Gbar_A08G017280.1	AT5G46590.1
GbNAC074	Gbar_A08G018550.1	AT1G12260.1
GbNAC074	Gbar_A08G018550.1	AT1G62700.1
GbNAC075	Gbar_A08G020500.1	AT4G28530.1
GbNAC078	Gbar_A08G025070.1	AT1G33280.1
GbNAC085	Gbar_A09G001800.1	AT5G39820.1
GbNAC086	Gbar_A09G003450.1	AT3G01600.1
GbNAC086	Gbar_A09G003450.1	AT5G14490.1
GbNAC087	Gbar_A09G005640.1	AT3G18400.1
GbNAC089	Gbar_A09G010720.1	AT3G44350.1
GbNAC089	Gbar_A09G010720.1	AT5G22380.1
GbNAC090	Gbar_A09G010800.1	AT2G27300.1
GbNAC090	Gbar_A09G010800.1	AT3G44290.1
GbNAC090	Gbar_A09G010800.1	AT5G22290.1
GbNAC093	Gbar_A09G018340.1	AT3G17730.1
GbNAC094	Gbar_A09G019710.1	AT3G49530.1
GbNAC101	Gbar_A11G001260.1	AT3G49530.1
GbNAC103	Gbar_A11G003210.1	AT5G07680.1
GbNAC104	Gbar_A11G004270.1	AT2G18060.1
GbNAC104	Gbar_A11G004270.1	AT4G36160.1
GbNAC105	Gbar_A11G005890.1	AT5G64060.1
GbNAC106	Gbar_A11G006870.1	AT3G01600.1
GbNAC106	Gbar_A11G006870.1	AT5G14490.1
GbNAC107	Gbar_A11G007310.1	AT3G29035.1
GbNAC107	Gbar_A11G007310.1	AT5G39610.1
GbNAC108	Gbar_A11G010490.1	AT2G46770.1
GbNAC108	Gbar_A11G010490.1	AT3G61910.1
GbNAC111	Gbar_A11G013630.1	AT4G28530.1
GbNAC113	Gbar_A11G018290.1	AT2G18060.1
GbNAC113	Gbar_A11G018290.1	AT4G36160.1
GbNAC113	Gbar_A11G018290.1	AT5G66300.1
GbNAC114	Gbar_A11G025490.1	AT3G04060.1
GbNAC115	Gbar_A11G025520.1	AT3G04070.1
GbNAC116	Gbar_A11G030720.1	AT3G15170.1
GbNAC118	Gbar_A12G003400.1	AT2G17040.1
GbNAC119	Gbar_A12G006170.1	AT2G18060.1
GbNAC119	Gbar_A12G006170.1	AT4G36160.1
GbNAC119	Gbar_A12G006170.1	AT5G66300.1
GbNAC120	Gbar_A12G012710.1	AT2G46770.1
GbNAC120	Gbar_A12G012710.1	AT3G61910.1
GbNAC121	Gbar_A12G015160.1	AT4G28500.1
GbNAC122	Gbar_A12G017590.1	AT1G69490.1
GbNAC124	Gbar_A12G019040.1	AT5G07680.1
GbNAC124	Gbar_A12G019040.1	AT5G61430.1
GbNAC126	Gbar_A12G022370.1	AT4G17980.1
GbNAC126	Gbar_A12G022370.1	AT5G46590.1
GbNAC128	Gbar_A12G025200.1	AT1G32770.1
GbNAC128	Gbar_A12G025200.1	AT2G46770.1
GbNAC129	Gbar_A12G025350.1	AT1G33060.1
GbNAC131	Gbar_A13G007670.1	AT1G26870.1
GbNAC132	Gbar_A13G011380.1	AT3G04060.1
GbNAC135	Gbar_A13G016000.1	AT1G52880.1
GbNAC135	Gbar_A13G016000.1	AT3G15510.1
GbNAC136	Gbar_A13G016320.1	AT3G15170.1
GbNAC137	Gbar_A13G018100.1	AT3G04070.1
GbNAC138	Gbar_D01G000130.1	AT2G17040.1
GbNAC142	Gbar_D01G005360.1	AT3G15170.1
GbNAC142	Gbar_D01G005360.1	AT5G53950.1
GbNAC143	Gbar_D01G006100.1	AT3G15500.1
GbNAC144	Gbar_D01G006110.1	AT3G15510.1
GbNAC145	Gbar_D01G009660.1	AT1G79580.1
GbNAC146	Gbar_D01G009820.1	AT1G76420.1
GbNAC149	Gbar_D02G007190.1	AT1G34190.1
GbNAC150	Gbar_D02G008420.1	AT1G77450.1
GbNAC151	Gbar_D02G013430.1	AT1G26870.1
GbNAC152	Gbar_D02G013560.1	AT1G69490.1
GbNAC153	Gbar_D02G018630.1	AT5G13180.1
GbNAC157	Gbar_D03G001070.1	AT2G18060.1
GbNAC157	Gbar_D03G001070.1	AT4G36160.1
GbNAC157	Gbar_D03G001070.1	AT5G66300.1
GbNAC158	Gbar_D03G008770.1	AT2G46770.1
GbNAC160	Gbar_D03G016950.1	AT1G12260.1
GbNAC160	Gbar_D03G016950.1	AT1G62700.1
GbNAC161	Gbar_D03G017750.1	AT1G32510.1
GbNAC161	Gbar_D03G017750.1	AT4G17980.1
GbNAC161	Gbar_D03G017750.1	AT5G46590.1
GbNAC164	Gbar_D04G003570.1	AT5G63790.1
GbNAC169	Gbar_D05G002780.1	AT4G29230.1
GbNAC169	Gbar_D05G002780.1	AT5G56620.1
GbNAC170	Gbar_D05G008160.1	AT2G27300.1
GbNAC170	Gbar_D05G008160.1	AT3G44290.1
GbNAC170	Gbar_D05G008160.1	AT5G22290.1
GbNAC171	Gbar_D05G016210.1	AT1G28470.1
GbNAC172	Gbar_D05G016670.1	AT1G61110.1
GbNAC173	Gbar_D05G018220.1	AT1G76420.1
GbNAC175	Gbar_D05G025020.1	AT1G34190.1
GbNAC182	Gbar_D06G004820.1	AT1G77450.1
GbNAC183	Gbar_D06G007420.1	AT4G29230.1
GbNAC183	Gbar_D06G007420.1	AT5G56620.1
GbNAC184	Gbar_D06G011830.1	AT2G24430.1
GbNAC187	Gbar_D06G014610.1	AT1G28470.1
GbNAC194	Gbar_D07G011970.1	AT3G44350.1
GbNAC194	Gbar_D07G011970.1	AT5G22380.1
GbNAC196	Gbar_D07G014620.1	AT2G46770.1
GbNAC196	Gbar_D07G014620.1	AT3G61910.1
GbNAC205	Gbar_D08G018030.1	AT1G32510.1
GbNAC205	Gbar_D08G018030.1	AT4G17980.1
GbNAC205	Gbar_D08G018030.1	AT5G46590.1
GbNAC206	Gbar_D08G019440.1	AT1G12260.1
GbNAC206	Gbar_D08G019440.1	AT1G62700.1
GbNAC216	Gbar_D09G001640.1	AT5G39820.1
GbNAC217	Gbar_D09G003230.1	AT3G01600.1
GbNAC217	Gbar_D09G003230.1	AT5G14490.1
GbNAC218	Gbar_D09G005270.1	AT3G18400.1
GbNAC220	Gbar_D09G010460.1	AT3G44350.1
GbNAC220	Gbar_D09G010460.1	AT5G22380.1
GbNAC221	Gbar_D09G010540.1	AT2G27300.1
GbNAC221	Gbar_D09G010540.1	AT3G44290.1
GbNAC221	Gbar_D09G010540.1	AT5G22290.1
GbNAC223	Gbar_D09G018050.1	AT3G17730.1
GbNAC224	Gbar_D09G019490.1	AT3G49530.1
GbNAC233	Gbar_D11G001610.1	AT3G49530.1
GbNAC237	Gbar_D11G004590.1	AT2G18060.1
GbNAC237	Gbar_D11G004590.1	AT4G36160.1
GbNAC239	Gbar_D11G007250.1	AT3G01600.1
GbNAC239	Gbar_D11G007250.1	AT5G14490.1
GbNAC240	Gbar_D11G007690.1	AT3G29035.1
GbNAC240	Gbar_D11G007690.1	AT5G39610.1
GbNAC241	Gbar_D11G011020.1	AT2G46770.1
GbNAC241	Gbar_D11G011020.1	AT3G61910.1
GbNAC244	Gbar_D11G014400.1	AT4G28530.1
GbNAC246	Gbar_D11G019150.1	AT2G18060.1
GbNAC246	Gbar_D11G019150.1	AT4G36160.1
GbNAC246	Gbar_D11G019150.1	AT5G66300.1
GbNAC249	Gbar_D11G031330.1	AT3G15170.1
GbNAC251	Gbar_D12G003830.1	AT2G17040.1
GbNAC252	Gbar_D12G006250.1	AT2G18060.1
GbNAC252	Gbar_D12G006250.1	AT4G36160.1
GbNAC252	Gbar_D12G006250.1	AT5G66300.1
GbNAC253	Gbar_D12G012670.1	AT2G46770.1
GbNAC253	Gbar_D12G012670.1	AT3G61910.1
GbNAC254	Gbar_D12G015150.1	AT4G28500.1
GbNAC255	Gbar_D12G017710.1	AT1G69490.1
GbNAC257	Gbar_D12G019250.1	AT5G07680.1
GbNAC257	Gbar_D12G019250.1	AT5G61430.1
GbNAC259	Gbar_D12G022870.1	AT1G62700.1
GbNAC260	Gbar_D12G025120.1	AT2G46770.1
GbNAC264	Gbar_D13G007590.1	AT1G26870.1
GbNAC265	Gbar_D13G011160.1	AT3G04060.1
GbNAC266	Gbar_D13G013220.1	AT1G71930.1
GbNAC268	Gbar_D13G015720.1	AT1G52880.1
GbNAC268	Gbar_D13G015720.1	AT3G15510.1
GbNAC269	Gbar_D13G016100.1	AT3G15170.1
GbNAC270	Gbar_D13G018130.1	AT3G04070.1

## Sheet: G. barbadense-G. raimodii
Supplementary Table S4 Synteny analysis between Gossypium barbadense and Gossypium raimondii
GbNAC Gene	GbNAC Gene ID	GrNAC Gene ID
GbNAC001	Gbar_A01G000010.1	Gorai.002G001900.1
GbNAC003	Gbar_A01G002960.1	Gorai.002G033100.1
GbNAC004	Gbar_A01G003150.1	Gorai.002G036700.1
GbNAC005	Gbar_A01G005190.1	Gorai.002G067300.1
GbNAC006	Gbar_A01G005760.1	Gorai.002G073700.1
GbNAC007	Gbar_A01G005770.1	Gorai.002G073800.1
GbNAC008	Gbar_A01G009360.1	Gorai.002G113300.1
GbNAC010	Gbar_A01G020220.1	Gorai.002G238300.1
GbNAC013	Gbar_A02G006260.1	Gorai.005G076200.1
GbNAC014	Gbar_A02G007430.1	Gorai.005G088800.1
GbNAC015	Gbar_A02G009970.1	Gorai.003G073300.1
GbNAC016	Gbar_A02G010420.1	Gorai.003G077700.1
GbNAC017	Gbar_A02G018140.1	Gorai.003G010700.1
GbNAC018	Gbar_A02G018750.1	Gorai.003G003900.1
GbNAC019	Gbar_A03G000700.1	Gorai.003G180600.1
GbNAC020	Gbar_A03G001580.1	Gorai.003G169000.1
GbNAC021	Gbar_A03G006890.1	Gorai.003G114100.1
GbNAC022	Gbar_A03G011370.1	Gorai.005G141200.1
GbNAC023	Gbar_A03G011530.1	Gorai.005G142300.1
GbNAC024	Gbar_A03G016800.1	Gorai.005G195300.1
GbNAC026	Gbar_A03G018940.1	Gorai.005G217400.1
GbNAC027	Gbar_A03G022770.1	Gorai.005G257800.1
GbNAC028	Gbar_A04G002530.1	Gorai.009G433100.1
GbNAC029	Gbar_A04G002550.1	Gorai.009G433200.1
GbNAC030	Gbar_A04G004620.1	Gorai.009G357700.1
GbNAC032	Gbar_A04G004760.1	Gorai.009G354900.1
GbNAC034	Gbar_A04G007880.1	Gorai.009G418700.1
GbNAC035	Gbar_A04G010670.1	Gorai.012G125500.1
GbNAC037	Gbar_A05G002510.1	Gorai.009G028900.1
GbNAC038	Gbar_A05G007660.1	Gorai.009G083500.1
GbNAC039	Gbar_A05G015790.1	Gorai.009G166300.1
GbNAC040	Gbar_A05G016230.1	Gorai.009G170700.1
GbNAC041	Gbar_A05G020290.1	Gorai.009G214000.1
GbNAC043	Gbar_A05G028900.1	Gorai.009G309300.1
GbNAC044	Gbar_A05G033820.1	Gorai.012G083700.1
GbNAC045	Gbar_A05G037020.1	Gorai.012G054800.1
GbNAC046	Gbar_A05G038590.1	Gorai.012G037600.1
GbNAC047	Gbar_A05G038740.1	Gorai.012G036100.1
GbNAC051	Gbar_A06G004620.1	Gorai.010G051900.1
GbNAC052	Gbar_A06G007180.1	Gorai.010G078900.1
GbNAC053	Gbar_A06G011380.1	Gorai.010G124100.1
GbNAC054	Gbar_A06G012610.1	Gorai.010G142400.1
GbNAC055	Gbar_A06G013600.1	Gorai.010G151400.1
GbNAC056	Gbar_A06G014410.1	Gorai.010G157600.1
GbNAC057	Gbar_A06G015120.1	Gorai.010G171100.1
GbNAC058	Gbar_A06G020920.1	Gorai.010G236700.1
GbNAC060	Gbar_A07G004410.1	Gorai.001G048200.1
GbNAC061	Gbar_A07G006690.1	Gorai.001G070700.1
GbNAC062	Gbar_A07G011620.1	Gorai.001G122800.1
GbNAC063	Gbar_A07G014100.1	Gorai.001G150000.1
GbNAC064	Gbar_A07G014170.1	Gorai.001G150800.1
GbNAC065	Gbar_A07G016000.1	Gorai.001G178800.1
GbNAC066	Gbar_A07G021200.1	Gorai.001G231400.1
GbNAC067	Gbar_A07G022750.1	Gorai.001G254300.1
GbNAC068	Gbar_A07G024600.1	Gorai.001G274500.1
GbNAC070	Gbar_A08G004250.1	Gorai.004G048200.1
GbNAC071	Gbar_A08G011900.1	Gorai.004G129200.1
GbNAC072	Gbar_A08G012220.1	Gorai.004G125900.1
GbNAC073	Gbar_A08G017280.1	Gorai.004G186700.1
GbNAC074	Gbar_A08G018550.1	Gorai.004G201100.1
GbNAC075	Gbar_A08G020500.1	Gorai.004G221300.1
GbNAC076	Gbar_A08G021100.1	Gorai.004G227000.1
GbNAC077	Gbar_A08G024160.1	Gorai.004G258200.1
GbNAC078	Gbar_A08G025070.1	Gorai.004G267300.1
GbNAC079	Gbar_A08G025180.1	Gorai.004G268400.1
GbNAC080	Gbar_A08G025190.1	Gorai.004G268500.1
GbNAC081	Gbar_A08G025380.1	Gorai.004G270200.1
GbNAC084	Gbar_A09G000500.1	Gorai.006G005100.1
GbNAC085	Gbar_A09G001800.1	Gorai.006G017700.1
GbNAC086	Gbar_A09G003450.1	Gorai.006G034600.1
GbNAC087	Gbar_A09G005640.1	Gorai.006G060900.1
GbNAC088	Gbar_A09G008410.1	Gorai.006G088400.1
GbNAC089	Gbar_A09G010720.1	Gorai.006G113000.1
GbNAC090	Gbar_A09G010800.1	Gorai.006G113700.1
GbNAC091	Gbar_A09G012170.1	Gorai.006G127700.1
GbNAC093	Gbar_A09G018340.1	Gorai.006G189600.1
GbNAC095	Gbar_A09G019850.1	Gorai.006G205300.1
GbNAC096	Gbar_A10G003080.1	Gorai.011G030600.1
GbNAC097	Gbar_A10G007290.1	Gorai.011G090000.1
GbNAC098	Gbar_A10G007500.1	Gorai.011G087700.1
GbNAC099	Gbar_A10G021570.1	Gorai.011G234200.1
GbNAC100	Gbar_A10G023230.1	Gorai.011G257000.1
GbNAC102	Gbar_A11G002540.1	Gorai.007G031300.1
GbNAC103	Gbar_A11G003210.1	Gorai.007G038100.1
GbNAC104	Gbar_A11G004270.1	Gorai.007G048000.1
GbNAC105	Gbar_A11G005890.1	Gorai.007G065300.1
GbNAC106	Gbar_A11G006870.1	Gorai.007G075300.1
GbNAC107	Gbar_A11G007310.1	Gorai.007G079900.1
GbNAC108	Gbar_A11G010490.1	Gorai.007G112500.1
GbNAC109	Gbar_A11G010700.1	Gorai.007G114400.1
GbNAC110	Gbar_A11G010710.1	Gorai.007G114500.1
GbNAC111	Gbar_A11G013630.1	Gorai.007G147300.1
GbNAC112	Gbar_A11G017520.1	Gorai.007G188800.1
GbNAC113	Gbar_A11G018290.1	Gorai.007G196400.1
GbNAC114	Gbar_A11G025490.1	Gorai.007G267700.1
GbNAC115	Gbar_A11G025520.1	Gorai.007G267900.1
GbNAC116	Gbar_A11G030720.1	Gorai.007G323900.1
GbNAC117	Gbar_A12G001300.1	Gorai.008G014700.1
GbNAC118	Gbar_A12G003400.1	Gorai.008G038800.1
GbNAC119	Gbar_A12G006170.1	Gorai.008G063600.1
GbNAC120	Gbar_A12G012710.1	Gorai.008G130300.1
GbNAC121	Gbar_A12G015160.1	Gorai.008G155200.1
GbNAC122	Gbar_A12G017590.1	Gorai.008G179900.1
GbNAC124	Gbar_A12G019040.1	Gorai.008G194400.1
GbNAC126	Gbar_A12G022370.1	Gorai.008G227800.1
GbNAC127	Gbar_A12G023250.1	Gorai.008G236400.1
GbNAC128	Gbar_A12G025200.1	Gorai.008G259700.1
GbNAC129	Gbar_A12G025350.1	Gorai.008G261400.1
GbNAC130	Gbar_A13G006760.1	Gorai.013G063500.1
GbNAC131	Gbar_A13G007670.1	Gorai.013G085000.1
GbNAC132	Gbar_A13G011380.1	Gorai.013G118000.1
GbNAC133	Gbar_A13G013500.1	Gorai.013G140700.1
GbNAC134	Gbar_A13G014000.1	Gorai.013G146300.1
GbNAC135	Gbar_A13G016000.1	Gorai.013G167100.1
GbNAC136	Gbar_A13G016320.1	Gorai.013G171300.1
GbNAC137	Gbar_A13G018100.1	Gorai.013G191800.1
GbNAC138	Gbar_D01G000130.1	Gorai.002G001900.1
GbNAC139	Gbar_D01G000740.1	Gorai.002G008500.1
GbNAC140	Gbar_D01G003130.1	Gorai.002G033100.1
GbNAC141	Gbar_D01G003330.1	Gorai.002G036700.1
GbNAC142	Gbar_D01G005360.1	Gorai.002G067300.1
GbNAC143	Gbar_D01G006100.1	Gorai.002G073700.1
GbNAC144	Gbar_D01G006110.1	Gorai.002G073800.1
GbNAC145	Gbar_D01G009660.1	Gorai.002G111200.1
GbNAC146	Gbar_D01G009820.1	Gorai.002G113300.1
GbNAC147	Gbar_D01G021360.1	Gorai.002G238300.1
GbNAC149	Gbar_D02G007190.1	Gorai.005G076200.1
GbNAC150	Gbar_D02G008420.1	Gorai.005G088800.1
GbNAC151	Gbar_D02G013430.1	Gorai.005G141200.1
GbNAC152	Gbar_D02G013560.1	Gorai.005G142300.1
GbNAC153	Gbar_D02G018630.1	Gorai.005G195300.1
GbNAC154	Gbar_D02G020860.1	Gorai.005G217400.1
GbNAC155	Gbar_D02G024630.1	Gorai.005G257800.1
GbNAC156	Gbar_D03G000380.1	Gorai.003G003900.1
GbNAC157	Gbar_D03G001070.1	Gorai.003G010700.1
GbNAC158	Gbar_D03G008770.1	Gorai.003G077700.1
GbNAC159	Gbar_D03G011300.1	Gorai.003G114100.1
GbNAC160	Gbar_D03G016950.1	Gorai.003G169000.1
GbNAC161	Gbar_D03G017750.1	Gorai.003G180600.1
GbNAC162	Gbar_D04G000600.1	Gorai.012G007000.1
GbNAC163	Gbar_D04G003420.1	Gorai.012G036100.1
GbNAC164	Gbar_D04G003570.1	Gorai.012G037600.1
GbNAC165	Gbar_D04G006930.1	Gorai.012G073400.1
GbNAC166	Gbar_D04G007910.1	Gorai.012G083700.1
GbNAC167	Gbar_D04G012370.1	Gorai.009G418700.1
GbNAC168	Gbar_D04G015340.1	Gorai.012G125500.1
GbNAC169	Gbar_D05G002780.1	Gorai.009G028900.1
GbNAC170	Gbar_D05G008160.1	Gorai.009G083500.1
GbNAC171	Gbar_D05G016210.1	Gorai.009G166300.1
GbNAC172	Gbar_D05G016670.1	Gorai.009G170700.1
GbNAC173	Gbar_D05G018220.1	Gorai.009G186000.1
GbNAC174	Gbar_D05G020950.1	Gorai.009G214000.1
GbNAC175	Gbar_D05G025020.1	Gorai.009G260000.1
GbNAC176	Gbar_D05G029720.1	Gorai.009G309000.1
GbNAC177	Gbar_D05G029750.1	Gorai.009G309300.1
GbNAC178	Gbar_D05G032550.1	Gorai.009G357700.1
GbNAC179	Gbar_D05G032770.1	Gorai.009G354900.1
GbNAC180	Gbar_D05G037310.1	Gorai.009G433200.1
GbNAC181	Gbar_D05G037320.1	Gorai.009G433100.1
GbNAC182	Gbar_D06G004820.1	Gorai.010G051900.1
GbNAC183	Gbar_D06G007420.1	Gorai.010G078900.1
GbNAC184	Gbar_D06G011830.1	Gorai.010G124100.1
GbNAC185	Gbar_D06G013190.1	Gorai.010G142400.1
GbNAC186	Gbar_D06G013920.1	Gorai.010G151400.1
GbNAC187	Gbar_D06G014610.1	Gorai.010G157600.1
GbNAC188	Gbar_D06G015880.1	Gorai.010G171100.1
GbNAC189	Gbar_D06G021700.1	Gorai.010G236700.1
GbNAC190	Gbar_D06G022900.1	Gorai.010G251100.1
GbNAC192	Gbar_D07G006990.1	Gorai.001G070700.1
GbNAC193	Gbar_D07G009000.1	Gorai.001G091900.1
GbNAC194	Gbar_D07G011970.1	Gorai.001G122800.1
GbNAC195	Gbar_D07G014540.1	Gorai.001G150000.1
GbNAC196	Gbar_D07G014620.1	Gorai.001G150800.1
GbNAC197	Gbar_D07G016420.1	Gorai.001G178800.1
GbNAC198	Gbar_D07G021850.1	Gorai.001G231400.1
GbNAC199	Gbar_D07G023300.1	Gorai.001G254300.1
GbNAC200	Gbar_D07G025350.1	Gorai.001G274500.1
GbNAC201	Gbar_D08G004410.1	Gorai.004G048200.1
GbNAC202	Gbar_D08G011990.1	Gorai.004G125900.1
GbNAC203	Gbar_D08G012350.1	Gorai.004G129200.1
GbNAC204	Gbar_D08G014330.1	Gorai.004G149000.1
GbNAC205	Gbar_D08G018030.1	Gorai.004G186700.1
GbNAC206	Gbar_D08G019440.1	Gorai.004G201100.1
GbNAC207	Gbar_D08G021430.1	Gorai.004G221300.1
GbNAC208	Gbar_D08G024770.1	Gorai.004G258200.1
GbNAC209	Gbar_D08G025710.1	Gorai.004G267300.1
GbNAC210	Gbar_D08G025820.1	Gorai.004G268400.1
GbNAC211	Gbar_D08G025830.1	Gorai.004G268500.1
GbNAC212	Gbar_D08G025990.1	Gorai.004G270200.1
GbNAC216	Gbar_D09G001640.1	Gorai.006G017700.1
GbNAC217	Gbar_D09G003230.1	Gorai.006G034600.1
GbNAC218	Gbar_D09G005270.1	Gorai.006G060900.1
GbNAC219	Gbar_D09G008060.1	Gorai.006G088400.1
GbNAC220	Gbar_D09G010460.1	Gorai.006G113000.1
GbNAC221	Gbar_D09G010540.1	Gorai.006G113700.1
GbNAC222	Gbar_D09G011960.1	Gorai.006G127700.1
GbNAC223	Gbar_D09G018050.1	Gorai.006G189600.1
GbNAC224	Gbar_D09G019490.1	Gorai.006G203800.1
GbNAC225	Gbar_D09G019610.1	Gorai.006G205300.1
GbNAC227	Gbar_D10G002990.1	Gorai.011G030600.1
GbNAC228	Gbar_D10G008280.1	Gorai.011G087700.1
GbNAC229	Gbar_D10G008480.1	Gorai.011G090000.1
GbNAC230	Gbar_D10G021820.1	Gorai.011G234200.1
GbNAC231	Gbar_D10G024940.1	Gorai.011G269400.1
GbNAC232	Gbar_D10G025100.1	Gorai.011G271300.1
GbNAC233	Gbar_D11G001610.1	Gorai.007G017500.1
GbNAC234	Gbar_D11G002940.1	Gorai.007G031300.1
GbNAC235	Gbar_D11G003590.1	Gorai.007G038100.1
GbNAC236	Gbar_D11G004190.1	Gorai.007G043900.1
GbNAC237	Gbar_D11G004590.1	Gorai.007G048000.1
GbNAC238	Gbar_D11G006270.1	Gorai.007G065300.1
GbNAC239	Gbar_D11G007250.1	Gorai.007G075300.1
GbNAC240	Gbar_D11G007690.1	Gorai.007G079900.1
GbNAC241	Gbar_D11G011020.1	Gorai.007G112500.1
GbNAC242	Gbar_D11G011200.1	Gorai.007G114400.1
GbNAC243	Gbar_D11G011210.1	Gorai.007G114500.1
GbNAC244	Gbar_D11G014400.1	Gorai.007G147300.1
GbNAC245	Gbar_D11G018400.1	Gorai.007G188800.1
GbNAC246	Gbar_D11G019150.1	Gorai.007G196400.1
GbNAC247	Gbar_D11G026410.1	Gorai.007G267700.1
GbNAC248	Gbar_D11G026430.1	Gorai.007G267900.1
GbNAC249	Gbar_D11G031330.1	Gorai.007G323900.1
GbNAC250	Gbar_D12G001480.1	Gorai.008G014700.1
GbNAC251	Gbar_D12G003830.1	Gorai.008G038800.1
GbNAC252	Gbar_D12G006250.1	Gorai.008G063600.1
GbNAC253	Gbar_D12G012670.1	Gorai.008G130300.1
GbNAC254	Gbar_D12G015150.1	Gorai.008G155200.1
GbNAC256	Gbar_D12G018360.1	Gorai.008G186300.1
GbNAC257	Gbar_D12G019250.1	Gorai.008G194400.1
GbNAC258	Gbar_D12G019560.1	Gorai.008G197500.1
GbNAC259	Gbar_D12G022870.1	Gorai.008G236400.1
GbNAC260	Gbar_D12G025120.1	Gorai.008G259700.1
GbNAC261	Gbar_D12G025270.1	Gorai.008G261400.1
GbNAC263	Gbar_D13G005480.1	Gorai.013G063500.1
GbNAC264	Gbar_D13G007590.1	Gorai.013G085000.1
GbNAC265	Gbar_D13G011160.1	Gorai.013G118000.1
GbNAC266	Gbar_D13G013220.1	Gorai.013G140700.1
GbNAC267	Gbar_D13G013730.1	Gorai.013G146300.1
GbNAC268	Gbar_D13G015720.1	Gorai.013G167100.1
GbNAC269	Gbar_D13G016100.1	Gorai.013G171300.1
GbNAC270	Gbar_D13G018130.1	Gorai.013G191800.1

## Sheet: G. barbadense-G. arboreum
Supplementary Table S4 Synteny analysis between Gossypium barbadense and Gossypium arboreum
GbNAC Gene	GbNAC Gene ID	GaNAC Gene ID
GbNAC001	Gbar_A01G000010.1	Cotton_A_00256
GbNAC002	Gbar_A01G000630.1	Cotton_A_00183
GbNAC005	Gbar_A01G005190.1	Cotton_A_06256
GbNAC006	Gbar_A01G005760.1	Cotton_A_06324
GbNAC007	Gbar_A01G005770.1	Cotton_A_06325
GbNAC008	Gbar_A01G009360.1	Cotton_A_12683
GbNAC010	Gbar_A01G020220.1	Cotton_A_10170
GbNAC013	Gbar_A02G006260.1	Cotton_A_08816
GbNAC017	Gbar_A02G018140.1	Cotton_A_01569
GbNAC018	Gbar_A02G018750.1	Cotton_A_01505
GbNAC019	Gbar_A03G000700.1	Cotton_A_23128
GbNAC020	Gbar_A03G001580.1	Cotton_A_17125
GbNAC023	Gbar_A03G011530.1	Cotton_A_28452
GbNAC027	Gbar_A03G022770.1	Cotton_A_00602
GbNAC028	Gbar_A04G002530.1	Cotton_A_13667
GbNAC029	Gbar_A04G002550.1	Cotton_A_13669
GbNAC037	Gbar_A05G002510.1	Cotton_A_09393
GbNAC038	Gbar_A05G007660.1	Cotton_A_13859
GbNAC039	Gbar_A05G015790.1	Cotton_A_11313
GbNAC041	Gbar_A05G020290.1	Cotton_A_08671
GbNAC051	Gbar_A06G004620.1	Cotton_A_16296
GbNAC052	Gbar_A06G007180.1	Cotton_A_18089
GbNAC058	Gbar_A06G020920.1	Cotton_A_05272
GbNAC059	Gbar_A06G022140.1	Cotton_A_04939
GbNAC060	Gbar_A07G004410.1	Cotton_A_03573
GbNAC061	Gbar_A07G006690.1	Cotton_A_02718
GbNAC062	Gbar_A07G011620.1	Cotton_A_09599
GbNAC063	Gbar_A07G014100.1	Cotton_A_14093
GbNAC065	Gbar_A07G016000.1	Cotton_A_28334
GbNAC066	Gbar_A07G021200.1	Cotton_A_15184
GbNAC067	Gbar_A07G022750.1	Cotton_A_29202
GbNAC068	Gbar_A07G024600.1	Cotton_A_22700
GbNAC070	Gbar_A08G004250.1	Cotton_A_12607
GbNAC073	Gbar_A08G017280.1	Cotton_A_13127
GbNAC074	Gbar_A08G018550.1	Cotton_A_18426
GbNAC075	Gbar_A08G020500.1	Cotton_A_20658
GbNAC076	Gbar_A08G021100.1	Cotton_A_05099
GbNAC077	Gbar_A08G024160.1	Cotton_A_05740
GbNAC078	Gbar_A08G025070.1	Cotton_A_05832
GbNAC079	Gbar_A08G025180.1	Cotton_A_05844
GbNAC080	Gbar_A08G025190.1	Cotton_A_05845
GbNAC085	Gbar_A09G001800.1	Cotton_A_30603
GbNAC091	Gbar_A09G012170.1	Cotton_A_01813
GbNAC092	Gbar_A09G013180.1	Cotton_A_07824
GbNAC093	Gbar_A09G018340.1	Cotton_A_13074
GbNAC094	Gbar_A09G019710.1	Cotton_A_08115
GbNAC095	Gbar_A09G019850.1	Cotton_A_08128
GbNAC096	Gbar_A10G003080.1	Cotton_A_03930
GbNAC098	Gbar_A10G007500.1	Cotton_A_07511
GbNAC101	Gbar_A11G001260.1	Cotton_A_02366
GbNAC102	Gbar_A11G002540.1	Cotton_A_09163
GbNAC105	Gbar_A11G005890.1	Cotton_A_09515
GbNAC106	Gbar_A11G006870.1	Cotton_A_20638
GbNAC107	Gbar_A11G007310.1	Cotton_A_15474
GbNAC108	Gbar_A11G010490.1	Cotton_A_15646
GbNAC110	Gbar_A11G010710.1	Cotton_A_15665
GbNAC111	Gbar_A11G013630.1	Cotton_A_03013
GbNAC116	Gbar_A11G030720.1	Cotton_A_17275
GbNAC117	Gbar_A12G001300.1	Cotton_A_15785
GbNAC121	Gbar_A12G015160.1	Cotton_A_04481
GbNAC122	Gbar_A12G017590.1	Cotton_A_06161
GbNAC124	Gbar_A12G019040.1	Cotton_A_13395
GbNAC126	Gbar_A12G022370.1	Cotton_A_07894
GbNAC127	Gbar_A12G023250.1	Cotton_A_07124
GbNAC128	Gbar_A12G025200.1	Cotton_A_13198
GbNAC129	Gbar_A12G025350.1	Cotton_A_17362
GbNAC130	Gbar_A13G006760.1	Cotton_A_00831
GbNAC134	Gbar_A13G014000.1	Cotton_A_02191
GbNAC135	Gbar_A13G016000.1	Cotton_A_16813
GbNAC136	Gbar_A13G016320.1	Cotton_A_16773
GbNAC138	Gbar_D01G000130.1	Cotton_A_00256
GbNAC139	Gbar_D01G000740.1	Cotton_A_00183
GbNAC142	Gbar_D01G005360.1	Cotton_A_06256
GbNAC143	Gbar_D01G006100.1	Cotton_A_06324
GbNAC144	Gbar_D01G006110.1	Cotton_A_06325
GbNAC146	Gbar_D01G009820.1	Cotton_A_12683
GbNAC147	Gbar_D01G021360.1	Cotton_A_10170
GbNAC149	Gbar_D02G007190.1	Cotton_A_08816
GbNAC152	Gbar_D02G013560.1	Cotton_A_28452
GbNAC155	Gbar_D02G024630.1	Cotton_A_00602
GbNAC156	Gbar_D03G000380.1	Cotton_A_01505
GbNAC157	Gbar_D03G001070.1	Cotton_A_01569
GbNAC160	Gbar_D03G016950.1	Cotton_A_17125
GbNAC161	Gbar_D03G017750.1	Cotton_A_23128
GbNAC162	Gbar_D04G000600.1	Cotton_A_06086
GbNAC165	Gbar_D04G006930.1	Cotton_A_25243
GbNAC168	Gbar_D04G015340.1	Cotton_A_24945
GbNAC169	Gbar_D05G002780.1	Cotton_A_09393
GbNAC171	Gbar_D05G016210.1	Cotton_A_11313
GbNAC173	Gbar_D05G018220.1	Cotton_A_04612
GbNAC174	Gbar_D05G020950.1	Cotton_A_08671
GbNAC175	Gbar_D05G025020.1	Cotton_A_04509
GbNAC180	Gbar_D05G037310.1	Cotton_A_13669
GbNAC181	Gbar_D05G037320.1	Cotton_A_13667
GbNAC182	Gbar_D06G004820.1	Cotton_A_16296
GbNAC183	Gbar_D06G007420.1	Cotton_A_18089
GbNAC189	Gbar_D06G021700.1	Cotton_A_05272
GbNAC190	Gbar_D06G022900.1	Cotton_A_04939
GbNAC192	Gbar_D07G006990.1	Cotton_A_02718
GbNAC194	Gbar_D07G011970.1	Cotton_A_09599
GbNAC197	Gbar_D07G016420.1	Cotton_A_28334
GbNAC198	Gbar_D07G021850.1	Cotton_A_15184
GbNAC199	Gbar_D07G023300.1	Cotton_A_29202
GbNAC200	Gbar_D07G025350.1	Cotton_A_22700
GbNAC201	Gbar_D08G004410.1	Cotton_A_12607
GbNAC205	Gbar_D08G018030.1	Cotton_A_13127
GbNAC206	Gbar_D08G019440.1	Cotton_A_18426
GbNAC207	Gbar_D08G021430.1	Cotton_A_20658
GbNAC208	Gbar_D08G024770.1	Cotton_A_05740
GbNAC209	Gbar_D08G025710.1	Cotton_A_05832
GbNAC210	Gbar_D08G025820.1	Cotton_A_05844
GbNAC211	Gbar_D08G025830.1	Cotton_A_05845
GbNAC216	Gbar_D09G001640.1	Cotton_A_30603
GbNAC222	Gbar_D09G011960.1	Cotton_A_01813
GbNAC223	Gbar_D09G018050.1	Cotton_A_13074
GbNAC225	Gbar_D09G019610.1	Cotton_A_08128
GbNAC226	Gbar_D09G025620.1	Cotton_A_09649
GbNAC227	Gbar_D10G002990.1	Cotton_A_03930
GbNAC228	Gbar_D10G008280.1	Cotton_A_07511
GbNAC231	Gbar_D10G024940.1	Cotton_A_25101
GbNAC231	Gbar_D10G024940.1	Cotton_A_25115
GbNAC232	Gbar_D10G025100.1	Cotton_A_13494
GbNAC234	Gbar_D11G002940.1	Cotton_A_09163
GbNAC236	Gbar_D11G004190.1	Cotton_A_01943
GbNAC238	Gbar_D11G006270.1	Cotton_A_09515
GbNAC239	Gbar_D11G007250.1	Cotton_A_20638
GbNAC240	Gbar_D11G007690.1	Cotton_A_15474
GbNAC241	Gbar_D11G011020.1	Cotton_A_15646
GbNAC242	Gbar_D11G011200.1	Cotton_A_15664
GbNAC243	Gbar_D11G011210.1	Cotton_A_15665
GbNAC244	Gbar_D11G014400.1	Cotton_A_03013
GbNAC249	Gbar_D11G031330.1	Cotton_A_17275
GbNAC250	Gbar_D12G001480.1	Cotton_A_15785
GbNAC254	Gbar_D12G015150.1	Cotton_A_04481
GbNAC257	Gbar_D12G019250.1	Cotton_A_13395
GbNAC259	Gbar_D12G022870.1	Cotton_A_07124
GbNAC260	Gbar_D12G025120.1	Cotton_A_13198
GbNAC261	Gbar_D12G025270.1	Cotton_A_17362
GbNAC263	Gbar_D13G005480.1	Cotton_A_00831
GbNAC267	Gbar_D13G013730.1	Cotton_A_02191
GbNAC268	Gbar_D13G015720.1	Cotton_A_16813
GbNAC269	Gbar_D13G016100.1	Cotton_A_16773

## Sheet: G. barbadense-G. hirsutum
Supplementary Table S4 Synteny analysis between Gossypium barbadense and Gossypium hirsutum
GbNAC Gene	GbNAC Gene ID	GhNAC Gene ID
GbNAC001	Gbar_A01G000010.1	Ghir_A01G000170.1
GbNAC001	Gbar_A01G000010.1	Ghir_D01G000180.1
GbNAC003	Gbar_A01G002960.1	Ghir_A01G003240.1
GbNAC003	Gbar_A01G002960.1	Ghir_D01G003210.1
GbNAC004	Gbar_A01G003150.1	Ghir_A01G003440.1
GbNAC004	Gbar_A01G003150.1	Ghir_D01G003460.1
GbNAC005	Gbar_A01G005190.1	Ghir_A01G005200.1
GbNAC005	Gbar_A01G005190.1	Ghir_D01G005410.1
GbNAC006	Gbar_A01G005760.1	Ghir_A01G005780.1
GbNAC006	Gbar_A01G005760.1	Ghir_D01G006050.1
GbNAC007	Gbar_A01G005770.1	Ghir_A01G005790.1
GbNAC007	Gbar_A01G005770.1	Ghir_D01G006060.1
GbNAC008	Gbar_A01G009360.1	Ghir_A01G009360.1
GbNAC008	Gbar_A01G009360.1	Ghir_D01G009770.1
GbNAC010	Gbar_A01G020220.1	Ghir_A01G019790.1
GbNAC010	Gbar_A01G020220.1	Ghir_D01G021240.1
GbNAC013	Gbar_A02G006260.1	Ghir_D02G006830.1
GbNAC014	Gbar_A02G007430.1	Ghir_A02G007610.1
GbNAC014	Gbar_A02G007430.1	Ghir_D02G008050.1
GbNAC016	Gbar_A02G010420.1	Ghir_D03G009330.1
GbNAC017	Gbar_A02G018140.1	Ghir_A02G018580.1
GbNAC017	Gbar_A02G018140.1	Ghir_D03G001040.1
GbNAC018	Gbar_A02G018750.1	Ghir_A02G019190.1
GbNAC018	Gbar_A02G018750.1	Ghir_D03G000370.1
GbNAC019	Gbar_A03G000700.1	Ghir_A03G000730.1
GbNAC019	Gbar_A03G000700.1	Ghir_D03G018430.1
GbNAC020	Gbar_A03G001580.1	Ghir_A03G001590.1
GbNAC020	Gbar_A03G001580.1	Ghir_D03G017480.1
GbNAC021	Gbar_A03G006890.1	Ghir_D03G011900.1
GbNAC022	Gbar_A03G011370.1	Ghir_A03G011380.1
GbNAC022	Gbar_A03G011370.1	Ghir_D02G012920.1
GbNAC023	Gbar_A03G011530.1	Ghir_A03G011520.1
GbNAC023	Gbar_A03G011530.1	Ghir_D02G013030.1
GbNAC024	Gbar_A03G016800.1	Ghir_A03G016760.1
GbNAC024	Gbar_A03G016800.1	Ghir_D02G018060.1
GbNAC026	Gbar_A03G018940.1	Ghir_A03G018860.1
GbNAC026	Gbar_A03G018940.1	Ghir_D02G020220.1
GbNAC027	Gbar_A03G022770.1	Ghir_A03G022610.1
GbNAC027	Gbar_A03G022770.1	Ghir_D02G024050.1
GbNAC028	Gbar_A04G002530.1	Ghir_A04G002840.1
GbNAC028	Gbar_A04G002530.1	Ghir_D05G036800.1
GbNAC029	Gbar_A04G002550.1	Ghir_D05G036790.1
GbNAC030	Gbar_A04G004620.1	Ghir_A04G005020.1
GbNAC030	Gbar_A04G004620.1	Ghir_D05G034230.1
GbNAC031	Gbar_A04G004630.1	Ghir_A04G005030.1
GbNAC032	Gbar_A04G004760.1	Ghir_A04G005150.1
GbNAC032	Gbar_A04G004760.1	Ghir_D05G034030.1
GbNAC033	Gbar_A04G006050.1	Ghir_A04G006440.1
GbNAC034	Gbar_A04G007880.1	Ghir_A04G008300.1
GbNAC034	Gbar_A04G007880.1	Ghir_D04G012360.1
GbNAC035	Gbar_A04G010670.1	Ghir_A04G010910.1
GbNAC035	Gbar_A04G010670.1	Ghir_D04G015160.1
GbNAC036	Gbar_A04G014360.1	Ghir_A04G014530.1
GbNAC037	Gbar_A05G002510.1	Ghir_A05G002820.1
GbNAC037	Gbar_A05G002510.1	Ghir_D05G002950.1
GbNAC038	Gbar_A05G007660.1	Ghir_A05G008210.1
GbNAC038	Gbar_A05G007660.1	Ghir_D05G008230.1
GbNAC039	Gbar_A05G015790.1	Ghir_A05G016360.1
GbNAC040	Gbar_A05G016230.1	Ghir_A05G016780.1
GbNAC040	Gbar_A05G016230.1	Ghir_D05G016630.1
GbNAC041	Gbar_A05G020290.1	Ghir_A05G020980.1
GbNAC043	Gbar_A05G028900.1	Ghir_D05G029880.1
GbNAC044	Gbar_A05G033820.1	Ghir_A05G034790.1
GbNAC045	Gbar_A05G037020.1	Ghir_A05G037820.1
GbNAC046	Gbar_A05G038590.1	Ghir_A05G039480.1
GbNAC047	Gbar_A05G038740.1	Ghir_A05G039620.1
GbNAC047	Gbar_A05G038740.1	Ghir_D04G003500.1
GbNAC048	Gbar_A05G041300.1	Ghir_A05G042260.1
GbNAC050	Gbar_A05G043940.1	Ghir_D05G025120.1
GbNAC051	Gbar_A06G004620.1	Ghir_D06G004850.1
GbNAC052	Gbar_A06G007180.1	Ghir_A06G007220.1
GbNAC052	Gbar_A06G007180.1	Ghir_D06G007390.1
GbNAC053	Gbar_A06G011380.1	Ghir_A06G012530.1
GbNAC053	Gbar_A06G011380.1	Ghir_D06G011870.1
GbNAC054	Gbar_A06G012610.1	Ghir_A06G011350.1
GbNAC054	Gbar_A06G012610.1	Ghir_D06G013210.1
GbNAC055	Gbar_A06G013600.1	Ghir_A06G013830.1
GbNAC055	Gbar_A06G013600.1	Ghir_D06G013970.1
GbNAC056	Gbar_A06G014410.1	Ghir_A06G014450.1
GbNAC056	Gbar_A06G014410.1	Ghir_D06G014710.1
GbNAC057	Gbar_A06G015120.1	Ghir_A06G015150.1
GbNAC058	Gbar_A06G020920.1	Ghir_A06G020950.1
GbNAC058	Gbar_A06G020920.1	Ghir_D06G022020.1
GbNAC059	Gbar_A06G022140.1	Ghir_A06G022180.1
GbNAC060	Gbar_A07G004410.1	Ghir_A07G004630.1
GbNAC060	Gbar_A07G004410.1	Ghir_D07G004670.1
GbNAC061	Gbar_A07G006690.1	Ghir_A07G006890.1
GbNAC061	Gbar_A07G006690.1	Ghir_D07G006860.1
GbNAC062	Gbar_A07G011620.1	Ghir_A07G011830.1
GbNAC062	Gbar_A07G011620.1	Ghir_D07G011870.1
GbNAC063	Gbar_A07G014100.1	Ghir_A07G014140.1
GbNAC064	Gbar_A07G014170.1	Ghir_A07G014220.1
GbNAC064	Gbar_A07G014170.1	Ghir_D07G014470.1
GbNAC065	Gbar_A07G016000.1	Ghir_A07G015980.1
GbNAC066	Gbar_A07G021200.1	Ghir_A07G021460.1
GbNAC067	Gbar_A07G022750.1	Ghir_A07G022970.1
GbNAC067	Gbar_A07G022750.1	Ghir_D07G023040.1
GbNAC068	Gbar_A07G024600.1	Ghir_A07G024850.1
GbNAC068	Gbar_A07G024600.1	Ghir_D07G024960.1
GbNAC070	Gbar_A08G004250.1	Ghir_A08G004230.1
GbNAC070	Gbar_A08G004250.1	Ghir_D08G004450.1
GbNAC071	Gbar_A08G011900.1	Ghir_A08G011500.1
GbNAC071	Gbar_A08G011900.1	Ghir_D08G011850.1
GbNAC072	Gbar_A08G012220.1	Ghir_A08G011870.1
GbNAC072	Gbar_A08G012220.1	Ghir_D08G011510.1
GbNAC073	Gbar_A08G017280.1	Ghir_A08G016660.1
GbNAC073	Gbar_A08G017280.1	Ghir_D08G017490.1
GbNAC074	Gbar_A08G018550.1	Ghir_A08G018000.1
GbNAC074	Gbar_A08G018550.1	Ghir_D08G018890.1
GbNAC075	Gbar_A08G020500.1	Ghir_A08G019960.1
GbNAC075	Gbar_A08G020500.1	Ghir_D08G020830.1
GbNAC076	Gbar_A08G021100.1	Ghir_A08G020510.1
GbNAC077	Gbar_A08G024160.1	Ghir_A08G023310.1
GbNAC078	Gbar_A08G025070.1	Ghir_A08G024190.1
GbNAC078	Gbar_A08G025070.1	Ghir_D08G025090.1
GbNAC079	Gbar_A08G025180.1	Ghir_A08G024310.1
GbNAC079	Gbar_A08G025180.1	Ghir_D08G025200.1
GbNAC080	Gbar_A08G025190.1	Ghir_A08G024320.1
GbNAC080	Gbar_A08G025190.1	Ghir_D08G025210.1
GbNAC081	Gbar_A08G025380.1	Ghir_A08G024490.1
GbNAC081	Gbar_A08G025380.1	Ghir_D08G025370.1
GbNAC084	Gbar_A09G000500.1	Ghir_A09G000450.1
GbNAC085	Gbar_A09G001800.1	Ghir_A09G001730.1
GbNAC085	Gbar_A09G001800.1	Ghir_D09G001620.1
GbNAC086	Gbar_A09G003450.1	Ghir_A09G003250.1
GbNAC086	Gbar_A09G003450.1	Ghir_D09G003180.1
GbNAC087	Gbar_A09G005640.1	Ghir_A09G005590.1
GbNAC087	Gbar_A09G005640.1	Ghir_D09G005180.1
GbNAC088	Gbar_A09G008410.1	Ghir_A09G008130.1
GbNAC089	Gbar_A09G010720.1	Ghir_A09G010480.1
GbNAC089	Gbar_A09G010720.1	Ghir_D09G010230.1
GbNAC090	Gbar_A09G010800.1	Ghir_A09G010550.1
GbNAC090	Gbar_A09G010800.1	Ghir_D09G010300.1
GbNAC091	Gbar_A09G012170.1	Ghir_A09G012160.1
GbNAC091	Gbar_A09G012170.1	Ghir_D09G011660.1
GbNAC092	Gbar_A09G013180.1	Ghir_A09G013130.1
GbNAC093	Gbar_A09G018340.1	Ghir_A09G018100.1
GbNAC094	Gbar_A09G019710.1	Ghir_A09G019490.1
GbNAC095	Gbar_A09G019850.1	Ghir_A09G019630.1
GbNAC095	Gbar_A09G019850.1	Ghir_D09G019150.1
GbNAC096	Gbar_A10G003080.1	Ghir_A10G002520.1
GbNAC096	Gbar_A10G003080.1	Ghir_D10G003310.1
GbNAC097	Gbar_A10G007290.1	Ghir_A10G006590.1
GbNAC097	Gbar_A10G007290.1	Ghir_D10G008760.1
GbNAC098	Gbar_A10G007500.1	Ghir_D10G008580.1
GbNAC099	Gbar_A10G021570.1	Ghir_A10G020470.1
GbNAC099	Gbar_A10G021570.1	Ghir_D10G022230.1
GbNAC100	Gbar_A10G023230.1	Ghir_A10G022160.1
GbNAC102	Gbar_A11G002540.1	Ghir_A11G003010.1
GbNAC102	Gbar_A11G002540.1	Ghir_D11G003020.1
GbNAC103	Gbar_A11G003210.1	Ghir_A11G003670.1
GbNAC104	Gbar_A11G004270.1	Ghir_A11G004700.1
GbNAC104	Gbar_A11G004270.1	Ghir_D11G004610.1
GbNAC105	Gbar_A11G005890.1	Ghir_A11G006270.1
GbNAC105	Gbar_A11G005890.1	Ghir_D11G006210.1
GbNAC106	Gbar_A11G006870.1	Ghir_A11G007260.1
GbNAC106	Gbar_A11G006870.1	Ghir_D11G007220.1
GbNAC107	Gbar_A11G007310.1	Ghir_A11G007690.1
GbNAC107	Gbar_A11G007310.1	Ghir_D11G007620.1
GbNAC108	Gbar_A11G010490.1	Ghir_A11G010830.1
GbNAC108	Gbar_A11G010490.1	Ghir_D11G010770.1
GbNAC109	Gbar_A11G010700.1	Ghir_A11G011040.1
GbNAC109	Gbar_A11G010700.1	Ghir_D11G010970.1
GbNAC110	Gbar_A11G010710.1	Ghir_A11G011050.1
GbNAC110	Gbar_A11G010710.1	Ghir_D11G010980.1
GbNAC111	Gbar_A11G013630.1	Ghir_A11G013960.1
GbNAC111	Gbar_A11G013630.1	Ghir_D11G014000.1
GbNAC112	Gbar_A11G017520.1	Ghir_A11G017980.1
GbNAC112	Gbar_A11G017520.1	Ghir_D11G018000.1
GbNAC113	Gbar_A11G018290.1	Ghir_D11G018860.1
GbNAC114	Gbar_A11G025490.1	Ghir_A11G026110.1
GbNAC114	Gbar_A11G025490.1	Ghir_D11G026250.1
GbNAC115	Gbar_A11G025520.1	Ghir_A11G026140.1
GbNAC115	Gbar_A11G025520.1	Ghir_D11G026270.1
GbNAC116	Gbar_A11G030720.1	Ghir_A11G031220.1
GbNAC116	Gbar_A11G030720.1	Ghir_D11G031500.1
GbNAC117	Gbar_A12G001300.1	Ghir_A12G001400.1
GbNAC117	Gbar_A12G001300.1	Ghir_D12G001440.1
GbNAC118	Gbar_A12G003400.1	Ghir_A12G003490.1
GbNAC118	Gbar_A12G003400.1	Ghir_D12G003820.1
GbNAC119	Gbar_A12G006170.1	Ghir_D12G006250.1
GbNAC120	Gbar_A12G012710.1	Ghir_A12G012530.1
GbNAC121	Gbar_A12G015160.1	Ghir_A12G015080.1
GbNAC121	Gbar_A12G015160.1	Ghir_D12G015300.1
GbNAC122	Gbar_A12G017590.1	Ghir_A12G017470.1
GbNAC122	Gbar_A12G017590.1	Ghir_D12G017690.1
GbNAC124	Gbar_A12G019040.1	Ghir_A12G018950.1
GbNAC124	Gbar_A12G019040.1	Ghir_D12G019160.1
GbNAC126	Gbar_A12G022370.1	Ghir_A12G022250.1
GbNAC126	Gbar_A12G022370.1	Ghir_D12G022270.1
GbNAC127	Gbar_A12G023250.1	Ghir_A12G023120.1
GbNAC127	Gbar_A12G023250.1	Ghir_D12G023110.1
GbNAC128	Gbar_A12G025200.1	Ghir_A12G025430.1
GbNAC128	Gbar_A12G025200.1	Ghir_D12G025440.1
GbNAC129	Gbar_A12G025350.1	Ghir_D12G025590.1
GbNAC130	Gbar_A13G006760.1	Ghir_A13G006570.1
GbNAC131	Gbar_A13G007670.1	Ghir_A13G007460.1
GbNAC132	Gbar_A13G011380.1	Ghir_A13G010650.1
GbNAC132	Gbar_A13G011380.1	Ghir_D13G011270.1
GbNAC133	Gbar_A13G013500.1	Ghir_A13G012710.1
GbNAC133	Gbar_A13G013500.1	Ghir_D13G013360.1
GbNAC134	Gbar_A13G014000.1	Ghir_A13G013200.1
GbNAC134	Gbar_A13G014000.1	Ghir_D13G013920.1
GbNAC135	Gbar_A13G016000.1	Ghir_A13G015120.1
GbNAC135	Gbar_A13G016000.1	Ghir_D13G015820.1
GbNAC136	Gbar_A13G016320.1	Ghir_A13G015420.1
GbNAC136	Gbar_A13G016320.1	Ghir_D13G016160.1
GbNAC137	Gbar_A13G018100.1	Ghir_A13G017540.1
GbNAC137	Gbar_A13G018100.1	Ghir_D13G018250.1
GbNAC138	Gbar_D01G000130.1	Ghir_A01G000170.1
GbNAC138	Gbar_D01G000130.1	Ghir_D01G000180.1
GbNAC139	Gbar_D01G000740.1	Ghir_D01G000790.1
GbNAC140	Gbar_D01G003130.1	Ghir_A01G003240.1
GbNAC140	Gbar_D01G003130.1	Ghir_D01G003210.1
GbNAC141	Gbar_D01G003330.1	Ghir_A01G003440.1
GbNAC141	Gbar_D01G003330.1	Ghir_D01G003460.1
GbNAC142	Gbar_D01G005360.1	Ghir_A01G005200.1
GbNAC142	Gbar_D01G005360.1	Ghir_D01G005410.1
GbNAC143	Gbar_D01G006100.1	Ghir_A01G005780.1
GbNAC143	Gbar_D01G006100.1	Ghir_D01G006050.1
GbNAC144	Gbar_D01G006110.1	Ghir_A01G005790.1
GbNAC144	Gbar_D01G006110.1	Ghir_D01G006060.1
GbNAC145	Gbar_D01G009660.1	Ghir_D01G009610.1
GbNAC146	Gbar_D01G009820.1	Ghir_A01G009360.1
GbNAC146	Gbar_D01G009820.1	Ghir_D01G009770.1
GbNAC147	Gbar_D01G021360.1	Ghir_A01G019790.1
GbNAC147	Gbar_D01G021360.1	Ghir_D01G021240.1
GbNAC149	Gbar_D02G007190.1	Ghir_D02G006830.1
GbNAC150	Gbar_D02G008420.1	Ghir_A02G007610.1
GbNAC150	Gbar_D02G008420.1	Ghir_D02G008050.1
GbNAC151	Gbar_D02G013430.1	Ghir_A03G011380.1
GbNAC151	Gbar_D02G013430.1	Ghir_D02G012920.1
GbNAC152	Gbar_D02G013560.1	Ghir_A03G011520.1
GbNAC152	Gbar_D02G013560.1	Ghir_D02G013030.1
GbNAC153	Gbar_D02G018630.1	Ghir_A03G016760.1
GbNAC153	Gbar_D02G018630.1	Ghir_D02G018060.1
GbNAC154	Gbar_D02G020860.1	Ghir_A03G018860.1
GbNAC154	Gbar_D02G020860.1	Ghir_D02G020220.1
GbNAC155	Gbar_D02G024630.1	Ghir_A03G022610.1
GbNAC155	Gbar_D02G024630.1	Ghir_D02G024050.1
GbNAC156	Gbar_D03G000380.1	Ghir_A02G019190.1
GbNAC156	Gbar_D03G000380.1	Ghir_D03G000370.1
GbNAC157	Gbar_D03G001070.1	Ghir_A02G018580.1
GbNAC157	Gbar_D03G001070.1	Ghir_D03G001040.1
GbNAC158	Gbar_D03G008770.1	Ghir_D03G009330.1
GbNAC159	Gbar_D03G011300.1	Ghir_D03G011900.1
GbNAC160	Gbar_D03G016950.1	Ghir_A03G001590.1
GbNAC160	Gbar_D03G016950.1	Ghir_D03G017480.1
GbNAC161	Gbar_D03G017750.1	Ghir_A03G000730.1
GbNAC161	Gbar_D03G017750.1	Ghir_D03G018430.1
GbNAC162	Gbar_D04G000600.1	Ghir_A05G042260.1
GbNAC162	Gbar_D04G000600.1	Ghir_D04G000650.1
GbNAC163	Gbar_D04G003420.1	Ghir_A05G039620.1
GbNAC163	Gbar_D04G003420.1	Ghir_D04G003500.1
GbNAC164	Gbar_D04G003570.1	Ghir_A05G039480.1
GbNAC165	Gbar_D04G006930.1	Ghir_A05G036090.1
GbNAC165	Gbar_D04G006930.1	Ghir_D04G006960.1
GbNAC166	Gbar_D04G007910.1	Ghir_A05G034790.1
GbNAC167	Gbar_D04G012370.1	Ghir_A04G008300.1
GbNAC167	Gbar_D04G012370.1	Ghir_D04G012360.1
GbNAC168	Gbar_D04G015340.1	Ghir_A04G010910.1
GbNAC168	Gbar_D04G015340.1	Ghir_D04G015160.1
GbNAC169	Gbar_D05G002780.1	Ghir_A05G002820.1
GbNAC169	Gbar_D05G002780.1	Ghir_D05G002950.1
GbNAC170	Gbar_D05G008160.1	Ghir_D05G008230.1
GbNAC171	Gbar_D05G016210.1	Ghir_A05G016360.1
GbNAC172	Gbar_D05G016670.1	Ghir_A05G016780.1
GbNAC172	Gbar_D05G016670.1	Ghir_D05G016630.1
GbNAC173	Gbar_D05G018220.1	Ghir_A05G018180.1
GbNAC173	Gbar_D05G018220.1	Ghir_D05G018190.1
GbNAC174	Gbar_D05G020950.1	Ghir_D05G020910.1
GbNAC175	Gbar_D05G025020.1	Ghir_A05G025090.1
GbNAC175	Gbar_D05G025020.1	Ghir_D05G025120.1
GbNAC176	Gbar_D05G029720.1	Ghir_A05G029770.1
GbNAC176	Gbar_D05G029720.1	Ghir_D05G029850.1
GbNAC177	Gbar_D05G029750.1	Ghir_D05G029880.1
GbNAC178	Gbar_D05G032550.1	Ghir_A04G005020.1
GbNAC178	Gbar_D05G032550.1	Ghir_D05G034230.1
GbNAC179	Gbar_D05G032770.1	Ghir_A04G005150.1
GbNAC179	Gbar_D05G032770.1	Ghir_D05G034030.1
GbNAC180	Gbar_D05G037310.1	Ghir_D05G036790.1
GbNAC181	Gbar_D05G037320.1	Ghir_A04G002840.1
GbNAC181	Gbar_D05G037320.1	Ghir_D05G036800.1
GbNAC182	Gbar_D06G004820.1	Ghir_D06G004850.1
GbNAC183	Gbar_D06G007420.1	Ghir_A06G007220.1
GbNAC183	Gbar_D06G007420.1	Ghir_D06G007390.1
GbNAC184	Gbar_D06G011830.1	Ghir_A06G012530.1
GbNAC184	Gbar_D06G011830.1	Ghir_D06G011870.1
GbNAC185	Gbar_D06G013190.1	Ghir_A06G011350.1
GbNAC185	Gbar_D06G013190.1	Ghir_D06G013210.1
GbNAC186	Gbar_D06G013920.1	Ghir_A06G013830.1
GbNAC186	Gbar_D06G013920.1	Ghir_D06G013970.1
GbNAC187	Gbar_D06G014610.1	Ghir_A06G014450.1
GbNAC187	Gbar_D06G014610.1	Ghir_D06G014710.1
GbNAC188	Gbar_D06G015880.1	Ghir_A06G015150.1
GbNAC189	Gbar_D06G021700.1	Ghir_A06G020950.1
GbNAC189	Gbar_D06G021700.1	Ghir_D06G022020.1
GbNAC190	Gbar_D06G022900.1	Ghir_A06G022180.1
GbNAC192	Gbar_D07G006990.1	Ghir_A07G006890.1
GbNAC192	Gbar_D07G006990.1	Ghir_D07G006860.1
GbNAC193	Gbar_D07G009000.1	Ghir_A07G008850.1
GbNAC193	Gbar_D07G009000.1	Ghir_D07G008940.1
GbNAC194	Gbar_D07G011970.1	Ghir_A07G011830.1
GbNAC194	Gbar_D07G011970.1	Ghir_D07G011870.1
GbNAC195	Gbar_D07G014540.1	Ghir_D07G014390.1
GbNAC196	Gbar_D07G014620.1	Ghir_A07G014220.1
GbNAC196	Gbar_D07G014620.1	Ghir_D07G014470.1
GbNAC197	Gbar_D07G016420.1	Ghir_A07G015980.1
GbNAC198	Gbar_D07G021850.1	Ghir_A07G021460.1
GbNAC199	Gbar_D07G023300.1	Ghir_A07G022970.1
GbNAC199	Gbar_D07G023300.1	Ghir_D07G023040.1
GbNAC200	Gbar_D07G025350.1	Ghir_A07G024850.1
GbNAC200	Gbar_D07G025350.1	Ghir_D07G024960.1
GbNAC201	Gbar_D08G004410.1	Ghir_A08G004230.1
GbNAC201	Gbar_D08G004410.1	Ghir_D08G004450.1
GbNAC202	Gbar_D08G011990.1	Ghir_A08G011870.1
GbNAC202	Gbar_D08G011990.1	Ghir_D08G011510.1
GbNAC203	Gbar_D08G012350.1	Ghir_A08G011500.1
GbNAC203	Gbar_D08G012350.1	Ghir_D08G011850.1
GbNAC204	Gbar_D08G014330.1	Ghir_D08G013880.1
GbNAC205	Gbar_D08G018030.1	Ghir_A08G016660.1
GbNAC205	Gbar_D08G018030.1	Ghir_D08G017490.1
GbNAC206	Gbar_D08G019440.1	Ghir_A08G018000.1
GbNAC206	Gbar_D08G019440.1	Ghir_D08G018890.1
GbNAC207	Gbar_D08G021430.1	Ghir_A08G019960.1
GbNAC207	Gbar_D08G021430.1	Ghir_D08G020830.1
GbNAC208	Gbar_D08G024770.1	Ghir_A08G023310.1
GbNAC209	Gbar_D08G025710.1	Ghir_A08G024190.1
GbNAC209	Gbar_D08G025710.1	Ghir_D08G025090.1
GbNAC210	Gbar_D08G025820.1	Ghir_A08G024310.1
GbNAC210	Gbar_D08G025820.1	Ghir_D08G025200.1
GbNAC211	Gbar_D08G025830.1	Ghir_A08G024320.1
GbNAC211	Gbar_D08G025830.1	Ghir_D08G025210.1
GbNAC212	Gbar_D08G025990.1	Ghir_A08G024490.1
GbNAC212	Gbar_D08G025990.1	Ghir_D08G025370.1
GbNAC216	Gbar_D09G001640.1	Ghir_A09G001730.1
GbNAC216	Gbar_D09G001640.1	Ghir_D09G001620.1
GbNAC217	Gbar_D09G003230.1	Ghir_A09G003250.1
GbNAC217	Gbar_D09G003230.1	Ghir_D09G003180.1
GbNAC218	Gbar_D09G005270.1	Ghir_A09G005590.1
GbNAC218	Gbar_D09G005270.1	Ghir_D09G005180.1
GbNAC219	Gbar_D09G008060.1	Ghir_A09G008130.1
GbNAC220	Gbar_D09G010460.1	Ghir_A09G010480.1
GbNAC220	Gbar_D09G010460.1	Ghir_D09G010230.1
GbNAC221	Gbar_D09G010540.1	Ghir_A09G010550.1
GbNAC221	Gbar_D09G010540.1	Ghir_D09G010300.1
GbNAC222	Gbar_D09G011960.1	Ghir_D09G011660.1
GbNAC223	Gbar_D09G018050.1	Ghir_A09G018100.1
GbNAC224	Gbar_D09G019490.1	Ghir_D09G019020.1
GbNAC225	Gbar_D09G019610.1	Ghir_A09G019630.1
GbNAC225	Gbar_D09G019610.1	Ghir_D09G019150.1
GbNAC227	Gbar_D10G002990.1	Ghir_A10G002520.1
GbNAC227	Gbar_D10G002990.1	Ghir_D10G003310.1
GbNAC228	Gbar_D10G008280.1	Ghir_D10G008580.1
GbNAC229	Gbar_D10G008480.1	Ghir_A10G006590.1
GbNAC229	Gbar_D10G008480.1	Ghir_D10G008760.1
GbNAC230	Gbar_D10G021820.1	Ghir_A10G020470.1
GbNAC230	Gbar_D10G021820.1	Ghir_D10G022230.1
GbNAC231	Gbar_D10G024940.1	Ghir_D10G025260.1
GbNAC232	Gbar_D10G025100.1	Ghir_D10G025430.1
GbNAC233	Gbar_D11G001610.1	Ghir_A11G001700.1
GbNAC233	Gbar_D11G001610.1	Ghir_D11G001690.1
GbNAC234	Gbar_D11G002940.1	Ghir_A11G003010.1
GbNAC234	Gbar_D11G002940.1	Ghir_D11G003020.1
GbNAC235	Gbar_D11G003590.1	Ghir_A11G003670.1
GbNAC236	Gbar_D11G004190.1	Ghir_A11G004300.1
GbNAC237	Gbar_D11G004590.1	Ghir_A11G004700.1
GbNAC237	Gbar_D11G004590.1	Ghir_D11G004610.1
GbNAC238	Gbar_D11G006270.1	Ghir_A11G006270.1
GbNAC238	Gbar_D11G006270.1	Ghir_D11G006210.1
GbNAC239	Gbar_D11G007250.1	Ghir_A11G007260.1
GbNAC239	Gbar_D11G007250.1	Ghir_D11G007220.1
GbNAC240	Gbar_D11G007690.1	Ghir_A11G007690.1
GbNAC240	Gbar_D11G007690.1	Ghir_D11G007620.1
GbNAC241	Gbar_D11G011020.1	Ghir_A11G010830.1
GbNAC241	Gbar_D11G011020.1	Ghir_D11G010770.1
GbNAC243	Gbar_D11G011210.1	Ghir_A11G011050.1
GbNAC243	Gbar_D11G011210.1	Ghir_D11G010980.1
GbNAC244	Gbar_D11G014400.1	Ghir_A11G013960.1
GbNAC244	Gbar_D11G014400.1	Ghir_D11G014000.1
GbNAC245	Gbar_D11G018400.1	Ghir_A11G017980.1
GbNAC245	Gbar_D11G018400.1	Ghir_D11G018000.1
GbNAC246	Gbar_D11G019150.1	Ghir_D11G018860.1
GbNAC247	Gbar_D11G026410.1	Ghir_A11G026110.1
GbNAC247	Gbar_D11G026410.1	Ghir_D11G026250.1
GbNAC248	Gbar_D11G026430.1	Ghir_A11G026140.1
GbNAC248	Gbar_D11G026430.1	Ghir_D11G026270.1
GbNAC249	Gbar_D11G031330.1	Ghir_A11G031220.1
GbNAC249	Gbar_D11G031330.1	Ghir_D11G031500.1
GbNAC250	Gbar_D12G001480.1	Ghir_A12G001400.1
GbNAC250	Gbar_D12G001480.1	Ghir_D12G001440.1
GbNAC251	Gbar_D12G003830.1	Ghir_A12G003490.1
GbNAC251	Gbar_D12G003830.1	Ghir_D12G003820.1
GbNAC252	Gbar_D12G006250.1	Ghir_D12G006250.1
GbNAC253	Gbar_D12G012670.1	Ghir_A12G012530.1
GbNAC254	Gbar_D12G015150.1	Ghir_A12G015080.1
GbNAC254	Gbar_D12G015150.1	Ghir_D12G015300.1
GbNAC256	Gbar_D12G018360.1	Ghir_A12G018090.1
GbNAC256	Gbar_D12G018360.1	Ghir_D12G018370.1
GbNAC257	Gbar_D12G019250.1	Ghir_A12G018950.1
GbNAC257	Gbar_D12G019250.1	Ghir_D12G019160.1
GbNAC258	Gbar_D12G019560.1	Ghir_D12G019460.1
GbNAC259	Gbar_D12G022870.1	Ghir_D12G023110.1
GbNAC260	Gbar_D12G025120.1	Ghir_A12G025430.1
GbNAC260	Gbar_D12G025120.1	Ghir_D12G025440.1
GbNAC261	Gbar_D12G025270.1	Ghir_D12G025590.1
GbNAC263	Gbar_D13G005480.1	Ghir_A13G006570.1
GbNAC263	Gbar_D13G005480.1	Ghir_D13G005720.1
GbNAC264	Gbar_D13G007590.1	Ghir_A13G007460.1
GbNAC265	Gbar_D13G011160.1	Ghir_A13G010650.1
GbNAC265	Gbar_D13G011160.1	Ghir_D13G011270.1
GbNAC266	Gbar_D13G013220.1	Ghir_A13G012710.1
GbNAC266	Gbar_D13G013220.1	Ghir_D13G013360.1
GbNAC267	Gbar_D13G013730.1	Ghir_A13G013200.1
GbNAC267	Gbar_D13G013730.1	Ghir_D13G013920.1
GbNAC268	Gbar_D13G015720.1	Ghir_A13G015120.1
GbNAC268	Gbar_D13G015720.1	Ghir_D13G015820.1
GbNAC269	Gbar_D13G016100.1	Ghir_A13G015420.1
GbNAC269	Gbar_D13G016100.1	Ghir_D13G016160.1
GbNAC270	Gbar_D13G018130.1	Ghir_A13G017540.1
GbNAC270	Gbar_D13G018130.1	Ghir_D13G018250.1
272 GhNAC genes were identified in Gossypium hirsutum
GhNAC Gene Name	GhNAC Gene ID
GhNAC001	Ghir_A01G000170.1
GhNAC002	Ghir_A01G000830.1
GhNAC003	Ghir_A01G003240.1
GhNAC004	Ghir_A01G003440.1
GhNAC005	Ghir_A01G005200.1
GhNAC006	Ghir_A01G005780.1
GhNAC007	Ghir_A01G005790.1
GhNAC008	Ghir_A01G009360.1
GhNAC009	Ghir_A01G019790.1
GhNAC010	Ghir_A02G001360.1
GhNAC011	Ghir_A02G001750.1
GhNAC012	Ghir_A02G006440.1
GhNAC013	Ghir_A02G007610.1
GhNAC014	Ghir_A02G018580.1
GhNAC015	Ghir_A02G019190.1
GhNAC016	Ghir_A03G000730.1
GhNAC017	Ghir_A03G001590.1
GhNAC018	Ghir_A03G006890.1
GhNAC019	Ghir_A03G011380.1
GhNAC020	Ghir_A03G011520.1
GhNAC021	Ghir_A03G016760.1
GhNAC022	Ghir_A03G016780.1
GhNAC023	Ghir_A03G018860.1
GhNAC024	Ghir_A03G022610.1
GhNAC025	Ghir_A04G002840.1
GhNAC026	Ghir_A04G002850.1
GhNAC027	Ghir_A04G005020.1
GhNAC028	Ghir_A04G005030.1
GhNAC029	Ghir_A04G005150.1
GhNAC030	Ghir_A04G006440.1
GhNAC031	Ghir_A04G008300.1
GhNAC032	Ghir_A04G010910.1
GhNAC033	Ghir_A04G014530.1
GhNAC034	Ghir_A05G002820.1
GhNAC035	Ghir_A05G008210.1
GhNAC036	Ghir_A05G016360.1
GhNAC037	Ghir_A05G016780.1
GhNAC038	Ghir_A05G018180.1
GhNAC039	Ghir_A05G020050.1
GhNAC040	Ghir_A05G020980.1
GhNAC041	Ghir_A05G025090.1
GhNAC042	Ghir_A05G029770.1
GhNAC043	Ghir_A05G034790.1
GhNAC044	Ghir_A05G036090.1
GhNAC045	Ghir_A05G037820.1
GhNAC046	Ghir_A05G039480.1
GhNAC047	Ghir_A05G039620.1
GhNAC048	Ghir_A05G042260.1
GhNAC049	Ghir_A06G004800.1
GhNAC050	Ghir_A06G007220.1
GhNAC051	Ghir_A06G011350.1
GhNAC052	Ghir_A06G012530.1
GhNAC053	Ghir_A06G013830.1
GhNAC054	Ghir_A06G014450.1
GhNAC055	Ghir_A06G015150.1
GhNAC056	Ghir_A06G020950.1
GhNAC057	Ghir_A06G022180.1
GhNAC058	Ghir_A07G004630.1
GhNAC059	Ghir_A07G006890.1
GhNAC060	Ghir_A07G008850.1
GhNAC061	Ghir_A07G011830.1
GhNAC062	Ghir_A07G014140.1
GhNAC063	Ghir_A07G014220.1
GhNAC064	Ghir_A07G015980.1
GhNAC065	Ghir_A07G021460.1
GhNAC066	Ghir_A07G022970.1
GhNAC067	Ghir_A07G024850.1
GhNAC068	Ghir_A08G004230.1
GhNAC069	Ghir_A08G011500.1
GhNAC070	Ghir_A08G011860.1
GhNAC071	Ghir_A08G011870.1
GhNAC072	Ghir_A08G016660.1
GhNAC073	Ghir_A08G018000.1
GhNAC074	Ghir_A08G019960.1
GhNAC075	Ghir_A08G020510.1
GhNAC076	Ghir_A08G023310.1
GhNAC077	Ghir_A08G024190.1
GhNAC078	Ghir_A08G024310.1
GhNAC079	Ghir_A08G024320.1
GhNAC080	Ghir_A08G024490.1
GhNAC081	Ghir_A08G024500.1
GhNAC082	Ghir_A08G024510.1
GhNAC083	Ghir_A09G000450.1
GhNAC084	Ghir_A09G001730.1
GhNAC085	Ghir_A09G003250.1
GhNAC086	Ghir_A09G005590.1
GhNAC087	Ghir_A09G008130.1
GhNAC088	Ghir_A09G010480.1
GhNAC089	Ghir_A09G010550.1
GhNAC090	Ghir_A09G012150.1
GhNAC091	Ghir_A09G012160.1
GhNAC092	Ghir_A09G013130.1
GhNAC093	Ghir_A09G018100.1
GhNAC094	Ghir_A09G019490.1
GhNAC095	Ghir_A09G019630.1
GhNAC096	Ghir_A10G002520.1
GhNAC097	Ghir_A10G006590.1
GhNAC098	Ghir_A10G006790.1
GhNAC099	Ghir_A10G020470.1
GhNAC100	Ghir_A10G022160.1
GhNAC101	Ghir_A11G001700.1
GhNAC102	Ghir_A11G003010.1
GhNAC103	Ghir_A11G003670.1
GhNAC104	Ghir_A11G004300.1
GhNAC105	Ghir_A11G004700.1
GhNAC106	Ghir_A11G006270.1
GhNAC107	Ghir_A11G007260.1
GhNAC108	Ghir_A11G007690.1
GhNAC109	Ghir_A11G010830.1
GhNAC110	Ghir_A11G011040.1
GhNAC111	Ghir_A11G011050.1
GhNAC112	Ghir_A11G013960.1
GhNAC113	Ghir_A11G017980.1
GhNAC114	Ghir_A11G018730.1
GhNAC115	Ghir_A11G026110.1
GhNAC116	Ghir_A11G026140.1
GhNAC117	Ghir_A11G031220.1
GhNAC118	Ghir_A12G001400.1
GhNAC119	Ghir_A12G003490.1
GhNAC120	Ghir_A12G012530.1
GhNAC121	Ghir_A12G015080.1
GhNAC122	Ghir_A12G017470.1
GhNAC123	Ghir_A12G018090.1
GhNAC124	Ghir_A12G018950.1
GhNAC125	Ghir_A12G022250.1
GhNAC126	Ghir_A12G023120.1
GhNAC127	Ghir_A12G025430.1
GhNAC128	Ghir_A12G025570.1
GhNAC129	Ghir_A13G006570.1
GhNAC130	Ghir_A13G007460.1
GhNAC131	Ghir_A13G010650.1
GhNAC132	Ghir_A13G012710.1
GhNAC133	Ghir_A13G013200.1
GhNAC134	Ghir_A13G015120.1
GhNAC135	Ghir_A13G015420.1
GhNAC136	Ghir_A13G017540.1
GhNAC137	Ghir_D01G000180.1
GhNAC138	Ghir_D01G000790.1
GhNAC139	Ghir_D01G003210.1
GhNAC140	Ghir_D01G003460.1
GhNAC141	Ghir_D01G005410.1
GhNAC142	Ghir_D01G006050.1
GhNAC143	Ghir_D01G006060.1
GhNAC144	Ghir_D01G009610.1
GhNAC145	Ghir_D01G009770.1
GhNAC146	Ghir_D01G021240.1
GhNAC147	Ghir_D02G001220.1
GhNAC148	Ghir_D02G001240.1
GhNAC149	Ghir_D02G001440.1
GhNAC150	Ghir_D02G001840.1
GhNAC151	Ghir_D02G006830.1
GhNAC152	Ghir_D02G008050.1
GhNAC153	Ghir_D02G012920.1
GhNAC154	Ghir_D02G013030.1
GhNAC155	Ghir_D02G018060.1
GhNAC156	Ghir_D02G020220.1
GhNAC157	Ghir_D02G024050.1
GhNAC158	Ghir_D03G000370.1
GhNAC159	Ghir_D03G001040.1
GhNAC160	Ghir_D03G009330.1
GhNAC161	Ghir_D03G011900.1
GhNAC162	Ghir_D03G017480.1
GhNAC163	Ghir_D03G018430.1
GhNAC164	Ghir_D04G000650.1
GhNAC165	Ghir_D04G003500.1
GhNAC166	Ghir_D04G005230.1
GhNAC167	Ghir_D04G006960.1
GhNAC168	Ghir_D04G007930.1
GhNAC169	Ghir_D04G010380.1
GhNAC170	Ghir_D04G012360.1
GhNAC171	Ghir_D04G015160.1
GhNAC172	Ghir_D04G019200.1
GhNAC173	Ghir_D04G020970.1
GhNAC174	Ghir_D05G002950.1
GhNAC175	Ghir_D05G008230.1
GhNAC176	Ghir_D05G016180.1
GhNAC177	Ghir_D05G016630.1
GhNAC178	Ghir_D05G018190.1
GhNAC179	Ghir_D05G020070.1
GhNAC180	Ghir_D05G020910.1
GhNAC181	Ghir_D05G025120.1
GhNAC182	Ghir_D05G029850.1
GhNAC183	Ghir_D05G029880.1
GhNAC184	Ghir_D05G034030.1
GhNAC185	Ghir_D05G034230.1
GhNAC186	Ghir_D05G036790.1
GhNAC187	Ghir_D05G036800.1
GhNAC188	Ghir_D06G000950.1
GhNAC189	Ghir_D06G004850.1
GhNAC190	Ghir_D06G007390.1
GhNAC191	Ghir_D06G011870.1
GhNAC192	Ghir_D06G013210.1
GhNAC193	Ghir_D06G013970.1
GhNAC194	Ghir_D06G014710.1
GhNAC195	Ghir_D06G016010.1
GhNAC196	Ghir_D06G022020.1
GhNAC197	Ghir_D07G004670.1
GhNAC198	Ghir_D07G006860.1
GhNAC199	Ghir_D07G008940.1
GhNAC200	Ghir_D07G011870.1
GhNAC201	Ghir_D07G014390.1
GhNAC202	Ghir_D07G014470.1
GhNAC203	Ghir_D07G016280.1
GhNAC204	Ghir_D07G023040.1
GhNAC205	Ghir_D07G024960.1
GhNAC206	Ghir_D07G025210.1
GhNAC207	Ghir_D08G004450.1
GhNAC208	Ghir_D08G011510.1
GhNAC209	Ghir_D08G011850.1
GhNAC210	Ghir_D08G013880.1
GhNAC211	Ghir_D08G017490.1
GhNAC212	Ghir_D08G018890.1
GhNAC213	Ghir_D08G020830.1
GhNAC214	Ghir_D08G025090.1
GhNAC215	Ghir_D08G025200.1
GhNAC216	Ghir_D08G025210.1
GhNAC217	Ghir_D08G025370.1
GhNAC218	Ghir_D08G025380.1
GhNAC219	Ghir_D08G025390.1
GhNAC220	Ghir_D09G001620.1
GhNAC221	Ghir_D09G003180.1
GhNAC222	Ghir_D09G005180.1
GhNAC223	Ghir_D09G007910.1
GhNAC224	Ghir_D09G010230.1
GhNAC225	Ghir_D09G010300.1
GhNAC226	Ghir_D09G011660.1
GhNAC227	Ghir_D09G017550.1
GhNAC228	Ghir_D09G019020.1
GhNAC229	Ghir_D09G019150.1
GhNAC230	Ghir_D10G003310.1
GhNAC231	Ghir_D10G008580.1
GhNAC232	Ghir_D10G008760.1
GhNAC233	Ghir_D10G022230.1
GhNAC234	Ghir_D10G025260.1
GhNAC235	Ghir_D10G025430.1
GhNAC236	Ghir_D11G001690.1
GhNAC237	Ghir_D11G003020.1
GhNAC238	Ghir_D11G003630.1
GhNAC239	Ghir_D11G004610.1
GhNAC240	Ghir_D11G006210.1
GhNAC241	Ghir_D11G007220.1
GhNAC242	Ghir_D11G007620.1
GhNAC243	Ghir_D11G010770.1
GhNAC244	Ghir_D11G010970.1
GhNAC245	Ghir_D11G010980.1
GhNAC246	Ghir_D11G014000.1
GhNAC247	Ghir_D11G018000.1
GhNAC248	Ghir_D11G018860.1
GhNAC249	Ghir_D11G026250.1
GhNAC250	Ghir_D11G026270.1
GhNAC251	Ghir_D11G031500.1
GhNAC252	Ghir_D12G001440.1
GhNAC253	Ghir_D12G003820.1
GhNAC254	Ghir_D12G006250.1
GhNAC255	Ghir_D12G015300.1
GhNAC256	Ghir_D12G017690.1
GhNAC257	Ghir_D12G018370.1
GhNAC258	Ghir_D12G019160.1
GhNAC259	Ghir_D12G019460.1
GhNAC260	Ghir_D12G022270.1
GhNAC261	Ghir_D12G023110.1
GhNAC262	Ghir_D12G025440.1
GhNAC263	Ghir_D12G025590.1
GhNAC264	Ghir_D13G005720.1
GhNAC265	Ghir_D13G011270.1
GhNAC266	Ghir_D13G013360.1
GhNAC267	Ghir_D13G013920.1
GhNAC268	Ghir_D13G015820.1
GhNAC269	Ghir_D13G016160.1
GhNAC270	Ghir_D13G018250.1
GhNAC271	Ghir_D13G025730.1
GhNAC272	Ghir_Scaffold1571G000010.1

## Sheet: 69 GbNAC genes
Supplementary Table S4 69 GbNAC genes have collinear relationships between G. barbadense and other species
GbNAC Gene	GbNAC Gene ID	NAC Gene ID
GbNAC001	Gbar_A01G000010.1	Cotton_A_00256
GbNAC001	Gbar_A01G000010.1	AT2G17040.1
GbNAC001	Gbar_A01G000010.1	Gorai.002G001900.1
GbNAC001	Gbar_A01G000010.1	Ghir_A01G000170.1
GbNAC001	Gbar_A01G000010.1	Ghir_D01G000180.1
GbNAC005	Gbar_A01G005190.1	Cotton_A_06256
GbNAC005	Gbar_A01G005190.1	AT3G15170.1
GbNAC005	Gbar_A01G005190.1	AT5G53950.1
GbNAC005	Gbar_A01G005190.1	Gorai.002G067300.1
GbNAC005	Gbar_A01G005190.1	Ghir_A01G005200.1
GbNAC005	Gbar_A01G005190.1	Ghir_D01G005410.1
GbNAC006	Gbar_A01G005760.1	Cotton_A_06324
GbNAC006	Gbar_A01G005760.1	AT3G15500.1
GbNAC006	Gbar_A01G005760.1	Gorai.002G073700.1
GbNAC006	Gbar_A01G005760.1	Ghir_A01G005780.1
GbNAC006	Gbar_A01G005760.1	Ghir_D01G006050.1
GbNAC007	Gbar_A01G005770.1	Cotton_A_06325
GbNAC007	Gbar_A01G005770.1	AT3G15510.1
GbNAC007	Gbar_A01G005770.1	Gorai.002G073800.1
GbNAC007	Gbar_A01G005770.1	Ghir_A01G005790.1
GbNAC007	Gbar_A01G005770.1	Ghir_D01G006060.1
GbNAC008	Gbar_A01G009360.1	Cotton_A_12683
GbNAC008	Gbar_A01G009360.1	AT1G76420.1
GbNAC008	Gbar_A01G009360.1	Gorai.002G113300.1
GbNAC008	Gbar_A01G009360.1	Ghir_A01G009360.1
GbNAC008	Gbar_A01G009360.1	Ghir_D01G009770.1
GbNAC013	Gbar_A02G006260.1	Cotton_A_08816
GbNAC013	Gbar_A02G006260.1	AT1G34190.1
GbNAC013	Gbar_A02G006260.1	Gorai.005G076200.1
GbNAC013	Gbar_A02G006260.1	Ghir_D02G006830.1
GbNAC017	Gbar_A02G018140.1	Cotton_A_01569
GbNAC017	Gbar_A02G018140.1	AT2G18060.1
GbNAC017	Gbar_A02G018140.1	AT4G36160.1
GbNAC017	Gbar_A02G018140.1	AT5G66300.1
GbNAC017	Gbar_A02G018140.1	Gorai.003G010700.1
GbNAC017	Gbar_A02G018140.1	Ghir_A02G018580.1
GbNAC017	Gbar_A02G018140.1	Ghir_D03G001040.1
GbNAC019	Gbar_A03G000700.1	Cotton_A_23128
GbNAC019	Gbar_A03G000700.1	AT1G32510.1
GbNAC019	Gbar_A03G000700.1	AT4G17980.1
GbNAC019	Gbar_A03G000700.1	AT5G46590.1
GbNAC019	Gbar_A03G000700.1	Gorai.003G180600.1
GbNAC019	Gbar_A03G000700.1	Ghir_A03G000730.1
GbNAC019	Gbar_A03G000700.1	Ghir_D03G018430.1
GbNAC020	Gbar_A03G001580.1	Cotton_A_17125
GbNAC020	Gbar_A03G001580.1	AT1G12260.1
GbNAC020	Gbar_A03G001580.1	AT1G62700.1
GbNAC020	Gbar_A03G001580.1	Gorai.003G169000.1
GbNAC020	Gbar_A03G001580.1	Ghir_A03G001590.1
GbNAC020	Gbar_A03G001580.1	Ghir_D03G017480.1
GbNAC023	Gbar_A03G011530.1	Cotton_A_28452
GbNAC023	Gbar_A03G011530.1	AT1G69490.1
GbNAC023	Gbar_A03G011530.1	Gorai.005G142300.1
GbNAC023	Gbar_A03G011530.1	Ghir_A03G011520.1
GbNAC023	Gbar_A03G011530.1	Ghir_D02G013030.1
GbNAC028	Gbar_A04G002530.1	Cotton_A_13667
GbNAC028	Gbar_A04G002530.1	AT1G52880.1
GbNAC028	Gbar_A04G002530.1	Gorai.009G433100.1
GbNAC028	Gbar_A04G002530.1	Ghir_A04G002840.1
GbNAC028	Gbar_A04G002530.1	Ghir_D05G036800.1
GbNAC029	Gbar_A04G002550.1	Cotton_A_13669
GbNAC029	Gbar_A04G002550.1	AT1G52890.1
GbNAC029	Gbar_A04G002550.1	Gorai.009G433200.1
GbNAC029	Gbar_A04G002550.1	Ghir_D05G036790.1
GbNAC038	Gbar_A05G007660.1	Cotton_A_13859
GbNAC038	Gbar_A05G007660.1	AT2G27300.1
GbNAC038	Gbar_A05G007660.1	AT3G44290.1
GbNAC038	Gbar_A05G007660.1	AT5G22290.1
GbNAC038	Gbar_A05G007660.1	Gorai.009G083500.1
GbNAC038	Gbar_A05G007660.1	Ghir_A05G008210.1
GbNAC038	Gbar_A05G007660.1	Ghir_D05G008230.1
GbNAC039	Gbar_A05G015790.1	Cotton_A_11313
GbNAC039	Gbar_A05G015790.1	AT1G28470.1
GbNAC039	Gbar_A05G015790.1	Gorai.009G166300.1
GbNAC039	Gbar_A05G015790.1	Ghir_A05G016360.1
GbNAC051	Gbar_A06G004620.1	Cotton_A_16296
GbNAC051	Gbar_A06G004620.1	AT1G77450.1
GbNAC051	Gbar_A06G004620.1	Gorai.010G051900.1
GbNAC051	Gbar_A06G004620.1	Ghir_D06G004850.1
GbNAC052	Gbar_A06G007180.1	Cotton_A_18089
GbNAC052	Gbar_A06G007180.1	AT4G29230.1
GbNAC052	Gbar_A06G007180.1	AT5G56620.1
GbNAC052	Gbar_A06G007180.1	Gorai.010G078900.1
GbNAC052	Gbar_A06G007180.1	Ghir_A06G007220.1
GbNAC052	Gbar_A06G007180.1	Ghir_D06G007390.1
GbNAC062	Gbar_A07G011620.1	Cotton_A_09599
GbNAC062	Gbar_A07G011620.1	AT3G44350.1
GbNAC062	Gbar_A07G011620.1	AT5G22380.1
GbNAC062	Gbar_A07G011620.1	Gorai.001G122800.1
GbNAC062	Gbar_A07G011620.1	Ghir_A07G011830.1
GbNAC062	Gbar_A07G011620.1	Ghir_D07G011870.1
GbNAC073	Gbar_A08G017280.1	Cotton_A_13127
GbNAC073	Gbar_A08G017280.1	AT1G32510.1
GbNAC073	Gbar_A08G017280.1	AT4G17980.1
GbNAC073	Gbar_A08G017280.1	AT5G46590.1
GbNAC073	Gbar_A08G017280.1	Gorai.004G186700.1
GbNAC073	Gbar_A08G017280.1	Ghir_A08G016660.1
GbNAC073	Gbar_A08G017280.1	Ghir_D08G017490.1
GbNAC074	Gbar_A08G018550.1	Cotton_A_18426
GbNAC074	Gbar_A08G018550.1	AT1G12260.1
GbNAC074	Gbar_A08G018550.1	AT1G62700.1
GbNAC074	Gbar_A08G018550.1	Gorai.004G201100.1
GbNAC074	Gbar_A08G018550.1	Ghir_A08G018000.1
GbNAC074	Gbar_A08G018550.1	Ghir_D08G018890.1
GbNAC075	Gbar_A08G020500.1	Cotton_A_20658
GbNAC075	Gbar_A08G020500.1	AT4G28530.1
GbNAC075	Gbar_A08G020500.1	Gorai.004G221300.1
GbNAC075	Gbar_A08G020500.1	Ghir_A08G019960.1
GbNAC075	Gbar_A08G020500.1	Ghir_D08G020830.1
GbNAC078	Gbar_A08G025070.1	Cotton_A_05832
GbNAC078	Gbar_A08G025070.1	AT1G33280.1
GbNAC078	Gbar_A08G025070.1	Gorai.004G267300.1
GbNAC078	Gbar_A08G025070.1	Ghir_A08G024190.1
GbNAC078	Gbar_A08G025070.1	Ghir_D08G025090.1
GbNAC085	Gbar_A09G001800.1	Cotton_A_30603
GbNAC085	Gbar_A09G001800.1	AT5G39820.1
GbNAC085	Gbar_A09G001800.1	Gorai.006G017700.1
GbNAC085	Gbar_A09G001800.1	Ghir_A09G001730.1
GbNAC085	Gbar_A09G001800.1	Ghir_D09G001620.1
GbNAC093	Gbar_A09G018340.1	Cotton_A_13074
GbNAC093	Gbar_A09G018340.1	AT3G17730.1
GbNAC093	Gbar_A09G018340.1	Gorai.006G189600.1
GbNAC093	Gbar_A09G018340.1	Ghir_A09G018100.1
GbNAC105	Gbar_A11G005890.1	Cotton_A_09515
GbNAC105	Gbar_A11G005890.1	AT5G64060.1
GbNAC105	Gbar_A11G005890.1	Gorai.007G065300.1
GbNAC105	Gbar_A11G005890.1	Ghir_A11G006270.1
GbNAC105	Gbar_A11G005890.1	Ghir_D11G006210.1
GbNAC106	Gbar_A11G006870.1	Cotton_A_20638
GbNAC106	Gbar_A11G006870.1	AT3G01600.1
GbNAC106	Gbar_A11G006870.1	AT5G14490.1
GbNAC106	Gbar_A11G006870.1	Gorai.007G075300.1
GbNAC106	Gbar_A11G006870.1	Ghir_A11G007260.1
GbNAC106	Gbar_A11G006870.1	Ghir_D11G007220.1
GbNAC107	Gbar_A11G007310.1	Cotton_A_15474
GbNAC107	Gbar_A11G007310.1	AT3G29035.1
GbNAC107	Gbar_A11G007310.1	AT5G39610.1
GbNAC107	Gbar_A11G007310.1	Gorai.007G079900.1
GbNAC107	Gbar_A11G007310.1	Ghir_A11G007690.1
GbNAC107	Gbar_A11G007310.1	Ghir_D11G007620.1
GbNAC108	Gbar_A11G010490.1	Cotton_A_15646
GbNAC108	Gbar_A11G010490.1	AT2G46770.1
GbNAC108	Gbar_A11G010490.1	AT3G61910.1
GbNAC108	Gbar_A11G010490.1	Gorai.007G112500.1
GbNAC108	Gbar_A11G010490.1	Ghir_A11G010830.1
GbNAC108	Gbar_A11G010490.1	Ghir_D11G010770.1
GbNAC111	Gbar_A11G013630.1	Cotton_A_03013
GbNAC111	Gbar_A11G013630.1	AT4G28530.1
GbNAC111	Gbar_A11G013630.1	Gorai.007G147300.1
GbNAC111	Gbar_A11G013630.1	Ghir_A11G013960.1
GbNAC111	Gbar_A11G013630.1	Ghir_D11G014000.1
GbNAC116	Gbar_A11G030720.1	Cotton_A_17275
GbNAC116	Gbar_A11G030720.1	AT3G15170.1
GbNAC116	Gbar_A11G030720.1	Gorai.007G323900.1
GbNAC116	Gbar_A11G030720.1	Ghir_A11G031220.1
GbNAC116	Gbar_A11G030720.1	Ghir_D11G031500.1
GbNAC121	Gbar_A12G015160.1	Cotton_A_04481
GbNAC121	Gbar_A12G015160.1	AT4G28500.1
GbNAC121	Gbar_A12G015160.1	Gorai.008G155200.1
GbNAC121	Gbar_A12G015160.1	Ghir_A12G015080.1
GbNAC121	Gbar_A12G015160.1	Ghir_D12G015300.1
GbNAC122	Gbar_A12G017590.1	Cotton_A_06161
GbNAC122	Gbar_A12G017590.1	AT1G69490.1
GbNAC122	Gbar_A12G017590.1	Gorai.008G179900.1
GbNAC122	Gbar_A12G017590.1	Ghir_A12G017470.1
GbNAC122	Gbar_A12G017590.1	Ghir_D12G017690.1
GbNAC124	Gbar_A12G019040.1	Cotton_A_13395
GbNAC124	Gbar_A12G019040.1	AT5G07680.1
GbNAC124	Gbar_A12G019040.1	AT5G61430.1
GbNAC124	Gbar_A12G019040.1	Gorai.008G194400.1
GbNAC124	Gbar_A12G019040.1	Ghir_A12G018950.1
GbNAC124	Gbar_A12G019040.1	Ghir_D12G019160.1
GbNAC126	Gbar_A12G022370.1	Cotton_A_07894
GbNAC126	Gbar_A12G022370.1	AT4G17980.1
GbNAC126	Gbar_A12G022370.1	AT5G46590.1
GbNAC126	Gbar_A12G022370.1	Gorai.008G227800.1
GbNAC126	Gbar_A12G022370.1	Ghir_A12G022250.1
GbNAC126	Gbar_A12G022370.1	Ghir_D12G022270.1
GbNAC128	Gbar_A12G025200.1	Cotton_A_13198
GbNAC128	Gbar_A12G025200.1	AT1G32770.1
GbNAC128	Gbar_A12G025200.1	AT2G46770.1
GbNAC128	Gbar_A12G025200.1	Gorai.008G259700.1
GbNAC128	Gbar_A12G025200.1	Ghir_A12G025430.1
GbNAC128	Gbar_A12G025200.1	Ghir_D12G025440.1
GbNAC129	Gbar_A12G025350.1	Cotton_A_17362
GbNAC129	Gbar_A12G025350.1	AT1G33060.1
GbNAC129	Gbar_A12G025350.1	Gorai.008G261400.1
GbNAC129	Gbar_A12G025350.1	Ghir_D12G025590.1
GbNAC135	Gbar_A13G016000.1	Cotton_A_16813
GbNAC135	Gbar_A13G016000.1	AT1G52880.1
GbNAC135	Gbar_A13G016000.1	AT3G15510.1
GbNAC135	Gbar_A13G016000.1	Gorai.013G167100.1
GbNAC135	Gbar_A13G016000.1	Ghir_A13G015120.1
GbNAC135	Gbar_A13G016000.1	Ghir_D13G015820.1
GbNAC136	Gbar_A13G016320.1	Cotton_A_16773
GbNAC136	Gbar_A13G016320.1	AT3G15170.1
GbNAC136	Gbar_A13G016320.1	Gorai.013G171300.1
GbNAC136	Gbar_A13G016320.1	Ghir_A13G015420.1
GbNAC136	Gbar_A13G016320.1	Ghir_D13G016160.1
GbNAC138	Gbar_D01G000130.1	Cotton_A_00256
GbNAC138	Gbar_D01G000130.1	AT2G17040.1
GbNAC138	Gbar_D01G000130.1	Gorai.002G001900.1
GbNAC138	Gbar_D01G000130.1	Ghir_A01G000170.1
GbNAC138	Gbar_D01G000130.1	Ghir_D01G000180.1
GbNAC142	Gbar_D01G005360.1	Cotton_A_06256
GbNAC142	Gbar_D01G005360.1	AT3G15170.1
GbNAC142	Gbar_D01G005360.1	AT5G53950.1
GbNAC142	Gbar_D01G005360.1	Gorai.002G067300.1
GbNAC142	Gbar_D01G005360.1	Ghir_A01G005200.1
GbNAC142	Gbar_D01G005360.1	Ghir_D01G005410.1
GbNAC143	Gbar_D01G006100.1	Cotton_A_06324
GbNAC143	Gbar_D01G006100.1	AT3G15500.1
GbNAC143	Gbar_D01G006100.1	Gorai.002G073700.1
GbNAC143	Gbar_D01G006100.1	Ghir_A01G005780.1
GbNAC143	Gbar_D01G006100.1	Ghir_D01G006050.1
GbNAC144	Gbar_D01G006110.1	Cotton_A_06325
GbNAC144	Gbar_D01G006110.1	AT3G15510.1
GbNAC144	Gbar_D01G006110.1	Gorai.002G073800.1
GbNAC144	Gbar_D01G006110.1	Ghir_A01G005790.1
GbNAC144	Gbar_D01G006110.1	Ghir_D01G006060.1
GbNAC146	Gbar_D01G009820.1	Cotton_A_12683
GbNAC146	Gbar_D01G009820.1	AT1G76420.1
GbNAC146	Gbar_D01G009820.1	Gorai.002G113300.1
GbNAC146	Gbar_D01G009820.1	Ghir_A01G009360.1
GbNAC146	Gbar_D01G009820.1	Ghir_D01G009770.1
GbNAC149	Gbar_D02G007190.1	Cotton_A_08816
GbNAC149	Gbar_D02G007190.1	AT1G34190.1
GbNAC149	Gbar_D02G007190.1	Gorai.005G076200.1
GbNAC149	Gbar_D02G007190.1	Ghir_D02G006830.1
GbNAC152	Gbar_D02G013560.1	Cotton_A_28452
GbNAC152	Gbar_D02G013560.1	AT1G69490.1
GbNAC152	Gbar_D02G013560.1	Gorai.005G142300.1
GbNAC152	Gbar_D02G013560.1	Ghir_A03G011520.1
GbNAC152	Gbar_D02G013560.1	Ghir_D02G013030.1
GbNAC157	Gbar_D03G001070.1	Cotton_A_01569
GbNAC157	Gbar_D03G001070.1	AT2G18060.1
GbNAC157	Gbar_D03G001070.1	AT4G36160.1
GbNAC157	Gbar_D03G001070.1	AT5G66300.1
GbNAC157	Gbar_D03G001070.1	Gorai.003G010700.1
GbNAC157	Gbar_D03G001070.1	Ghir_A02G018580.1
GbNAC157	Gbar_D03G001070.1	Ghir_D03G001040.1
GbNAC160	Gbar_D03G016950.1	Cotton_A_17125
GbNAC160	Gbar_D03G016950.1	AT1G12260.1
GbNAC160	Gbar_D03G016950.1	AT1G62700.1
GbNAC160	Gbar_D03G016950.1	Gorai.003G169000.1
GbNAC160	Gbar_D03G016950.1	Ghir_A03G001590.1
GbNAC160	Gbar_D03G016950.1	Ghir_D03G017480.1
GbNAC161	Gbar_D03G017750.1	Cotton_A_23128
GbNAC161	Gbar_D03G017750.1	AT1G32510.1
GbNAC161	Gbar_D03G017750.1	AT4G17980.1
GbNAC161	Gbar_D03G017750.1	AT5G46590.1
GbNAC161	Gbar_D03G017750.1	Gorai.003G180600.1
GbNAC161	Gbar_D03G017750.1	Ghir_A03G000730.1
GbNAC161	Gbar_D03G017750.1	Ghir_D03G018430.1
GbNAC169	Gbar_D05G002780.1	Cotton_A_09393
GbNAC169	Gbar_D05G002780.1	AT4G29230.1
GbNAC169	Gbar_D05G002780.1	AT5G56620.1
GbNAC169	Gbar_D05G002780.1	Gorai.009G028900.1
GbNAC169	Gbar_D05G002780.1	Ghir_A05G002820.1
GbNAC169	Gbar_D05G002780.1	Ghir_D05G002950.1
GbNAC171	Gbar_D05G016210.1	Cotton_A_11313
GbNAC171	Gbar_D05G016210.1	AT1G28470.1
GbNAC171	Gbar_D05G016210.1	Gorai.009G166300.1
GbNAC171	Gbar_D05G016210.1	Ghir_A05G016360.1
GbNAC173	Gbar_D05G018220.1	Cotton_A_04612
GbNAC173	Gbar_D05G018220.1	AT1G76420.1
GbNAC173	Gbar_D05G018220.1	Gorai.009G186000.1
GbNAC173	Gbar_D05G018220.1	Ghir_A05G018180.1
GbNAC173	Gbar_D05G018220.1	Ghir_D05G018190.1
GbNAC175	Gbar_D05G025020.1	Cotton_A_04509
GbNAC175	Gbar_D05G025020.1	AT1G34190.1
GbNAC175	Gbar_D05G025020.1	Gorai.009G260000.1
GbNAC175	Gbar_D05G025020.1	Ghir_A05G025090.1
GbNAC175	Gbar_D05G025020.1	Ghir_D05G025120.1
GbNAC182	Gbar_D06G004820.1	Cotton_A_16296
GbNAC182	Gbar_D06G004820.1	AT1G77450.1
GbNAC182	Gbar_D06G004820.1	Gorai.010G051900.1
GbNAC182	Gbar_D06G004820.1	Ghir_D06G004850.1
GbNAC183	Gbar_D06G007420.1	Cotton_A_18089
GbNAC183	Gbar_D06G007420.1	AT4G29230.1
GbNAC183	Gbar_D06G007420.1	AT5G56620.1
GbNAC183	Gbar_D06G007420.1	Gorai.010G078900.1
GbNAC183	Gbar_D06G007420.1	Ghir_A06G007220.1
GbNAC183	Gbar_D06G007420.1	Ghir_D06G007390.1
GbNAC194	Gbar_D07G011970.1	Cotton_A_09599
GbNAC194	Gbar_D07G011970.1	AT3G44350.1
GbNAC194	Gbar_D07G011970.1	AT5G22380.1
GbNAC194	Gbar_D07G011970.1	Gorai.001G122800.1
GbNAC194	Gbar_D07G011970.1	Ghir_A07G011830.1
GbNAC194	Gbar_D07G011970.1	Ghir_D07G011870.1
GbNAC205	Gbar_D08G018030.1	Cotton_A_13127
GbNAC205	Gbar_D08G018030.1	AT1G32510.1
GbNAC205	Gbar_D08G018030.1	AT4G17980.1
GbNAC205	Gbar_D08G018030.1	AT5G46590.1
GbNAC205	Gbar_D08G018030.1	Gorai.004G186700.1
GbNAC205	Gbar_D08G018030.1	Ghir_A08G016660.1
GbNAC205	Gbar_D08G018030.1	Ghir_D08G017490.1
GbNAC206	Gbar_D08G019440.1	Cotton_A_18426
GbNAC206	Gbar_D08G019440.1	AT1G12260.1
GbNAC206	Gbar_D08G019440.1	AT1G62700.1
GbNAC206	Gbar_D08G019440.1	Gorai.004G201100.1
GbNAC206	Gbar_D08G019440.1	Ghir_A08G018000.1
GbNAC206	Gbar_D08G019440.1	Ghir_D08G018890.1
GbNAC216	Gbar_D09G001640.1	Cotton_A_30603
GbNAC216	Gbar_D09G001640.1	AT5G39820.1
GbNAC216	Gbar_D09G001640.1	Gorai.006G017700.1
GbNAC216	Gbar_D09G001640.1	Ghir_A09G001730.1
GbNAC216	Gbar_D09G001640.1	Ghir_D09G001620.1
GbNAC223	Gbar_D09G018050.1	Cotton_A_13074
GbNAC223	Gbar_D09G018050.1	AT3G17730.1
GbNAC223	Gbar_D09G018050.1	Gorai.006G189600.1
GbNAC223	Gbar_D09G018050.1	Ghir_A09G018100.1
GbNAC239	Gbar_D11G007250.1	Cotton_A_20638
GbNAC239	Gbar_D11G007250.1	AT3G01600.1
GbNAC239	Gbar_D11G007250.1	AT5G14490.1
GbNAC239	Gbar_D11G007250.1	Gorai.007G075300.1
GbNAC239	Gbar_D11G007250.1	Ghir_A11G007260.1
GbNAC239	Gbar_D11G007250.1	Ghir_D11G007220.1
GbNAC240	Gbar_D11G007690.1	Cotton_A_15474
GbNAC240	Gbar_D11G007690.1	AT3G29035.1
GbNAC240	Gbar_D11G007690.1	AT5G39610.1
GbNAC240	Gbar_D11G007690.1	Gorai.007G079900.1
GbNAC240	Gbar_D11G007690.1	Ghir_A11G007690.1
GbNAC240	Gbar_D11G007690.1	Ghir_D11G007620.1
GbNAC241	Gbar_D11G011020.1	Cotton_A_15646
GbNAC241	Gbar_D11G011020.1	AT2G46770.1
GbNAC241	Gbar_D11G011020.1	AT3G61910.1
GbNAC241	Gbar_D11G011020.1	Gorai.007G112500.1
GbNAC241	Gbar_D11G011020.1	Ghir_A11G010830.1
GbNAC241	Gbar_D11G011020.1	Ghir_D11G010770.1
GbNAC244	Gbar_D11G014400.1	Cotton_A_03013
GbNAC244	Gbar_D11G014400.1	AT4G28530.1
GbNAC244	Gbar_D11G014400.1	Gorai.007G147300.1
GbNAC244	Gbar_D11G014400.1	Ghir_A11G013960.1
GbNAC244	Gbar_D11G014400.1	Ghir_D11G014000.1
GbNAC249	Gbar_D11G031330.1	Cotton_A_17275
GbNAC249	Gbar_D11G031330.1	AT3G15170.1
GbNAC249	Gbar_D11G031330.1	Gorai.007G323900.1
GbNAC249	Gbar_D11G031330.1	Ghir_A11G031220.1
GbNAC249	Gbar_D11G031330.1	Ghir_D11G031500.1
GbNAC254	Gbar_D12G015150.1	Cotton_A_04481
GbNAC254	Gbar_D12G015150.1	AT4G28500.1
GbNAC254	Gbar_D12G015150.1	Gorai.008G155200.1
GbNAC254	Gbar_D12G015150.1	Ghir_A12G015080.1
GbNAC254	Gbar_D12G015150.1	Ghir_D12G015300.1
GbNAC257	Gbar_D12G019250.1	Cotton_A_13395
GbNAC257	Gbar_D12G019250.1	AT5G07680.1
GbNAC257	Gbar_D12G019250.1	AT5G61430.1
GbNAC257	Gbar_D12G019250.1	Gorai.008G194400.1
GbNAC257	Gbar_D12G019250.1	Ghir_A12G018950.1
GbNAC257	Gbar_D12G019250.1	Ghir_D12G019160.1
GbNAC259	Gbar_D12G022870.1	Cotton_A_07124
GbNAC259	Gbar_D12G022870.1	AT1G62700.1
GbNAC259	Gbar_D12G022870.1	Gorai.008G236400.1
GbNAC259	Gbar_D12G022870.1	Ghir_D12G023110.1
GbNAC260	Gbar_D12G025120.1	Cotton_A_13198
GbNAC260	Gbar_D12G025120.1	AT2G46770.1
GbNAC260	Gbar_D12G025120.1	Gorai.008G259700.1
GbNAC260	Gbar_D12G025120.1	Ghir_A12G025430.1
GbNAC260	Gbar_D12G025120.1	Ghir_D12G025440.1
GbNAC268	Gbar_D13G015720.1	Cotton_A_16813
GbNAC268	Gbar_D13G015720.1	AT1G52880.1
GbNAC268	Gbar_D13G015720.1	AT3G15510.1
GbNAC268	Gbar_D13G015720.1	Gorai.013G167100.1
GbNAC268	Gbar_D13G015720.1	Ghir_A13G015120.1
GbNAC268	Gbar_D13G015720.1	Ghir_D13G015820.1
GbNAC269	Gbar_D13G016100.1	Cotton_A_16773
GbNAC269	Gbar_D13G016100.1	AT3G15170.1
GbNAC269	Gbar_D13G016100.1	Gorai.013G171300.1
GbNAC269	Gbar_D13G016100.1	Ghir_A13G015420.1
GbNAC269	Gbar_D13G016100.1	Ghir_D13G016160.1
