# Supplementary material for: Systematic analysis of NAC transcription factors in Gossypium barbadense uncovers their roles in response to Verticillium wilt
Source: PeerJ. 2019 Nov 5;7:e7995. doi: 10.7717/peerj.7995 (PMC6839521; doi:10.7717/peerj.7995)
Supplement: Table S5 [file peerj-07-7995-s008.xlsx]

## Sheet: Sheet1
Supplementary Table S5. Motifs of 270 GbNAC genes
Gene symbol	Gene locus	Group	Chromosome	Motif
GbNAC001	Gbar_A01G000010.1	VI	A01	motif9	motif10	motif13
GbNAC002	Gbar_A01G000630.1	III	A01	motif9	motif10	motif13
GbNAC003	Gbar_A01G002960.1	II	A01	motif2	motif7	motif12	motif18
GbNAC004	Gbar_A01G003150.1	VI	A01	motif9	motif10	motif13
GbNAC005	Gbar_A01G005190.1	II	A01	motif1	motif6	motif5
GbNAC006	Gbar_A01G005760.1	IV	A01	motif14	motif16	motif17	motif20
GbNAC007	Gbar_A01G005770.1	IV	A01	motif4	motif8	motif12	motif14	motif17
GbNAC008	Gbar_A01G009360.1	II	A01	motif4	motif8	motif12	motif17	motif18
GbNAC009	Gbar_A01G013160.1	VI	A01	motif16	motif20
GbNAC010	Gbar_A01G020220.1	VI	A01	motif7	motif12
GbNAC011	Gbar_A01G023430.1	VI	Scaffold3757	motif10	motif16	motif20
GbNAC012	Gbar_A01G023460.1	VI	Scaffold3757	motif2	motif7	motif5
GbNAC013	Gbar_A02G006260.1	V	A02	motif1	motif3	motif6
GbNAC014	Gbar_A02G007430.1	IV	A02	motif17	motif20
GbNAC015	Gbar_A02G009970.1	VII	A02	motif9	motif10	motif13
GbNAC016	Gbar_A02G010420.1	I	A02	motif9	motif10	motif13	motif18	motif19
GbNAC017	Gbar_A02G018140.1	I	A02	motif4	motif8	motif12	motif17	motif18	motif19
GbNAC018	Gbar_A02G018750.1	VI	A02	motif3	motif6
GbNAC019	Gbar_A03G000700.1	V	A03	motif1	motif3	motif6
GbNAC020	Gbar_A03G001580.1	I	A03	motif4	motif8	motif12	motif14	motif17	motif19
GbNAC021	Gbar_A03G006890.1	I	A03	motif4	motif9	motif13	motif18	motif19
GbNAC022	Gbar_A03G011370.1	VI	A03	motif9	motif10	motif13	motif18
GbNAC023	Gbar_A03G011530.1	IV	A03	motif2	motif7	motif5	motif14
GbNAC024	Gbar_A03G016800.1	IX	A03	motif8	motif10	motif12	motif18
GbNAC025	Gbar_A03G016820.1	IX	A03	motif2	motif7	motif12
GbNAC026	Gbar_A03G018940.1	X	A03	motif3	motif20
GbNAC027	Gbar_A03G022770.1	VI	A03	motif1	motif6	motif5
GbNAC028	Gbar_A04G002530.1	IV	A04	motif2	motif7	motif5	motif14
GbNAC029	Gbar_A04G002550.1	IV	A04	motif1	motif6	motif5	motif14
GbNAC030	Gbar_A04G004620.1	VI	A04	motif8	motif10	motif12	motif17
GbNAC031	Gbar_A04G004630.1	VI	A04	motif3	motif20
GbNAC032	Gbar_A04G004760.1	II	A04	motif4	motif9	motif16
GbNAC033	Gbar_A04G006050.1	VI	A04	motif8
GbNAC034	Gbar_A04G007880.1	IV	A04	motif9	motif10	motif13
GbNAC035	Gbar_A04G010670.1	IX	A04	motif3	motif8	motif10	motif18
GbNAC036	Gbar_A04G014360.1	IV	A04	motif10	motif13
GbNAC037	Gbar_A05G002510.1	VIII	A05	motif11	motif15
GbNAC038	Gbar_A05G007660.1	VII	A05	motif2	motif7	motif5
GbNAC039	Gbar_A05G015790.1	VIII	A05	motif11	motif15
GbNAC040	Gbar_A05G016230.1	IV	A05	motif1	motif6	motif5	motif14
GbNAC041	Gbar_A05G020290.1	X	A05	motif16	motif20
GbNAC042	Gbar_A05G028870.2	V	A05	motif4	motif9	motif16	motif17
GbNAC043	Gbar_A05G028900.1	V	A05	motif2	motif3	motif8
GbNAC044	Gbar_A05G033820.1	IX	A05	motif12	motif20
GbNAC045	Gbar_A05G037020.1	VI	A05	motif4	motif8	motif12	motif17
GbNAC046	Gbar_A05G038590.1	IV	A05	motif2	motif7	motif5
GbNAC047	Gbar_A05G038740.1	X	A05	motif9	motif13
GbNAC048	Gbar_A05G041300.1	V	A05	motif1	motif3	motif6
GbNAC049	Gbar_A05G043040.1	II	Scaffold2926	motif1	motif6	motif5	motif18
GbNAC050	Gbar_A05G043940.1	V	Scaffold91	motif4	motif9	motif13
GbNAC051	Gbar_A06G004620.1	IV	A06	motif1	motif6	motif5	motif18
GbNAC052	Gbar_A06G007180.1	VIII	A06	motif11	motif15
GbNAC053	Gbar_A06G011380.1	II	A06	motif10	motif14	motif16	motif17	motif20
GbNAC054	Gbar_A06G012610.1	VI	A06	motif2	motif7	motif5
GbNAC055	Gbar_A06G013600.1	IV	A06	motif10	motif13	motif14	motif20
GbNAC056	Gbar_A06G014410.1	VIII	A06	motif11	motif15
GbNAC057	Gbar_A06G015120.1	VI	A06	motif3	motif8	motif10
GbNAC058	Gbar_A06G020920.1	VI	A06	motif9	motif10	motif13
GbNAC059	Gbar_A06G022140.1	X	A06	motif16	motif20
GbNAC060	Gbar_A07G004410.1	I	A07	motif2	motif3	motif7	motif18	motif19
GbNAC061	Gbar_A07G006690.1	V	A07	motif1	motif3	motif6
GbNAC062	Gbar_A07G011620.1	VI	A07	motif7	motif10	motif12
GbNAC063	Gbar_A07G014100.1	VIII	A07	motif3	motif6
GbNAC064	Gbar_A07G014170.1	I	A07	motif16	motif18	motif19	motif20
GbNAC065	Gbar_A07G016000.1	II	A07	motif3	motif8	motif10	motif14
GbNAC066	Gbar_A07G021200.1	VIII	A07	motif16	motif20
GbNAC067	Gbar_A07G022750.1	II	A07	motif4	motif8	motif12	motif14
GbNAC068	Gbar_A07G024600.1	IX	A07	motif3
GbNAC069	Gbar_A07G025450.1	VI	Scaffold589	motif2	motif7	motif5
GbNAC070	Gbar_A08G004250.1	V	A08	motif1	motif3	motif6
GbNAC071	Gbar_A08G011900.1	I	A08	motif2	motif3	motif7	motif14	motif19
GbNAC072	Gbar_A08G012220.1	VII	A08	motif4	motif8	motif12	motif17
GbNAC073	Gbar_A08G017280.1	V	A08	motif16	motif17	motif20
GbNAC074	Gbar_A08G018550.1	I	A08	motif1	motif6	motif12	motif14	motif17	motif19
GbNAC075	Gbar_A08G020500.1	II	A08	motif4	motif9	motif14	motif16
GbNAC076	Gbar_A08G021100.1	VIII	A08	motif16	motif20
GbNAC077	Gbar_A08G024160.1	X	A08	motif16	motif20
GbNAC078	Gbar_A08G025070.1	I	A08	motif1	motif3	motif6	motif14	motif19
GbNAC079	Gbar_A08G025180.1	V	A08	motif4	motif8	motif13
GbNAC080	Gbar_A08G025190.1	I	A08	motif9	motif10	motif13	motif18
GbNAC081	Gbar_A08G025380.1	VI	A08	motif10	motif20
GbNAC082	Gbar_A08G025390.1	VI	A08	motif4	motif8	motif16	motif17
GbNAC083	Gbar_A08G025400.1	VI	A08	motif2	motif7	motif5
GbNAC084	Gbar_A09G000500.1	III	A09	motif4	motif9	motif13
GbNAC085	Gbar_A09G001800.1	VI	A09	motif2	motif7	motif5	motif18
GbNAC086	Gbar_A09G003450.1	VIII	A09	motif11	motif15
GbNAC087	Gbar_A09G005640.1	II	A09	motif14	motif16	motif17	motif20
GbNAC088	Gbar_A09G008410.1	IV	A09	motif4	motif8	motif12	motif17
GbNAC089	Gbar_A09G010720.1	VI	A09	motif6	motif16
GbNAC090	Gbar_A09G010800.1	VII	A09	motif2	motif5	motif8
GbNAC091	Gbar_A09G012170.1	III	A09	motif1	motif6	motif5
GbNAC092	Gbar_A09G013180.1	III	A09	motif20
GbNAC093	Gbar_A09G018340.1	V	A09	motif4	motif9	motif13
GbNAC094	Gbar_A09G019710.1	VII	A09	motif1	motif6	motif12	motif17
GbNAC095	Gbar_A09G019850.1	I	A09	motif4	motif9	motif13	motif18	motif19
GbNAC096	Gbar_A10G003080.1	IV	A10	motif4	motif9	motif16	motif17
GbNAC097	Gbar_A10G007290.1	VI	A10	motif9	motif10	motif13
GbNAC098	Gbar_A10G007500.1	IX	A10	motif3	motif20
GbNAC099	Gbar_A10G021570.1	V	A10	motif2	motif8	motif17
GbNAC100	Gbar_A10G023230.1	X	A10	motif16	motif20
GbNAC101	Gbar_A11G001260.1	VII	A11	motif1	motif6	motif12	motif17
GbNAC102	Gbar_A11G002540.1	V	A11	motif2	motif3	motif7
GbNAC103	Gbar_A11G003210.1	II	A11	motif4	motif9	motif16	motif17	motif18
GbNAC104	Gbar_A11G004270.1	I	A11	motif4	motif8	motif13	motif18	motif19
GbNAC105	Gbar_A11G005890.1	V	A11	motif10	motif13	motif20
GbNAC106	Gbar_A11G006870.1	VIII	A11	motif11	motif15
GbNAC107	Gbar_A11G007310.1	II	A11	motif2	motif7	motif5	motif18
GbNAC108	Gbar_A11G010490.1	I	A11	motif2	motif3	motif7	motif14	motif19
GbNAC109	Gbar_A11G010700.1	VIII	A11	motif20
GbNAC110	Gbar_A11G010710.1	VIII	A11	motif16	motif20
GbNAC111	Gbar_A11G013630.1	II	A11	motif4	motif9	motif14	motif16
GbNAC112	Gbar_A11G017520.1	V	A11	motif10	motif13	motif20
GbNAC113	Gbar_A11G018290.1	I	A11	motif9	motif10	motif13	motif18	motif19
GbNAC114	Gbar_A11G025490.1	II	A11	motif9	motif10	motif13	motif14
GbNAC115	Gbar_A11G025520.1	IV	A11	motif4	motif5	motif8	motif14
GbNAC116	Gbar_A11G030720.1	II	A11	motif4	motif8	motif12	motif17
GbNAC117	Gbar_A12G001300.1	X	A12	motif8	motif12
GbNAC118	Gbar_A12G003400.1	VI	A12	motif4	motif9	motif16
GbNAC119	Gbar_A12G006170.1	I	A12	motif9	motif10	motif13	motif18	motif19
GbNAC120	Gbar_A12G012710.1	I	A12	motif2	motif3	motif7	motif18	motif19
GbNAC121	Gbar_A12G015160.1	VIII	A12	motif11	motif15
GbNAC122	Gbar_A12G017590.1	IV	A12	motif4	motif8	motif12	motif14	motif17
GbNAC123	Gbar_A12G018260.1	VIII	A12	motif11	motif15
GbNAC124	Gbar_A12G019040.1	II	A12	motif4	motif8	motif12	motif17	motif18
GbNAC125	Gbar_A12G019360.1	X	A12	motif16	motif20
GbNAC126	Gbar_A12G022370.1	V	A12	motif2	motif3	motif7
GbNAC127	Gbar_A12G023250.1	I	A12	motif1	motif3	motif6	motif14	motif19
GbNAC128	Gbar_A12G025200.1	I	A12	motif9	motif10	motif13	motif18	motif19
GbNAC129	Gbar_A12G025350.1	VII	A12	motif9	motif10	motif13
GbNAC130	Gbar_A13G006760.1	X	A13	motif12	motif20
GbNAC131	Gbar_A13G007670.1	VI	A13	motif9	motif10	motif13	motif18
GbNAC132	Gbar_A13G011380.1	II	A13	motif4	motif8	motif12	motif14	motif17
GbNAC133	Gbar_A13G013500.1	I	A13	motif9	motif10	motif13	motif18
GbNAC134	Gbar_A13G014000.1	V	A13	motif1	motif3	motif6
GbNAC135	Gbar_A13G016000.1	IV	A13	motif2	motif7	motif5	motif14
GbNAC136	Gbar_A13G016320.1	II	A13	motif2	motif7	motif5
GbNAC137	Gbar_A13G018100.1	IV	A13	motif9	motif10	motif13	motif14
GbNAC138	Gbar_D01G000130.1	VI	D01	motif2	motif7	motif5
GbNAC139	Gbar_D01G000740.1	III	D01	motif1	motif7	motif5
GbNAC140	Gbar_D01G003130.1	II	D01	motif1	motif6	motif12	motif18
GbNAC141	Gbar_D01G003330.1	VI	D01	motif8	motif10	motif12	motif17
GbNAC142	Gbar_D01G005360.1	II	D01	motif4	motif9	motif16	motif17
GbNAC143	Gbar_D01G006100.1	IV	D01	motif1	motif6	motif5	motif14
GbNAC144	Gbar_D01G006110.1	IV	D01	motif4	motif8	motif12	motif14	motif17
GbNAC145	Gbar_D01G009660.1	I	D01	motif3	motif7
GbNAC146	Gbar_D01G009820.1	II	D01	motif1	motif6	motif5	motif18
GbNAC147	Gbar_D01G021360.1	VI	D01	motif7	motif12
GbNAC148	Gbar_D01G024160.1	VI	Scaffold2267	motif1	motif6	motif5
GbNAC149	Gbar_D02G007190.1	V	D02	motif2	motif3	motif7
GbNAC150	Gbar_D02G008420.1	IV	D02	motif1	motif6	motif5
GbNAC151	Gbar_D02G013430.1	VI	D02	motif2	motif7	motif5	motif18
GbNAC152	Gbar_D02G013560.1	IV	D02	motif2	motif7	motif5	motif14
GbNAC153	Gbar_D02G018630.1	IX	D02	motif2	motif7	motif12	motif18
GbNAC154	Gbar_D02G020860.1	X	D02	motif12	motif20
GbNAC155	Gbar_D02G024630.1	VI	D02	motif9	motif10	motif13
GbNAC156	Gbar_D03G000380.1	VI	D03	motif13	motif20
GbNAC157	Gbar_D03G001070.1	I	D03	motif10	motif13	motif18	motif19	motif20
GbNAC158	Gbar_D03G008770.1	I	D03	motif1	motif3	motif6	motif18	motif19
GbNAC159	Gbar_D03G011300.1	I	D03	motif9	motif10	motif13	motif18	motif19
GbNAC160	Gbar_D03G016950.1	I	D03	motif4	motif8	motif12	motif14	motif17	motif19
GbNAC161	Gbar_D03G017750.1	V	D03	motif4	motif8	motif13
GbNAC162	Gbar_D04G000600.1	V	D04	motif16	motif17	motif20
GbNAC163	Gbar_D04G003420.1	X	D04	motif3	motif7
GbNAC164	Gbar_D04G003570.1	IV	D04	motif1	motif6	motif5
GbNAC165	Gbar_D04G006930.1	III	D04	motif4	motif9
GbNAC166	Gbar_D04G007910.1	IX	D04	motif3	motif20
GbNAC167	Gbar_D04G012370.1	IV	D04	motif9	motif10	motif16
GbNAC168	Gbar_D04G015340.1	IX	D04	motif1	motif6	motif12	motif18
GbNAC169	Gbar_D05G002780.1	VIII	D05	motif11	motif15
GbNAC170	Gbar_D05G008160.1	VII	D05	motif1	motif6	motif5
GbNAC171	Gbar_D05G016210.1	VIII	D05	motif11	motif15
GbNAC172	Gbar_D05G016670.1	IV	D05	motif1	motif6	motif5	motif14
GbNAC173	Gbar_D05G018220.1	II	D05	motif2	motif7	motif5	motif18
GbNAC174	Gbar_D05G020950.1	X	D05	motif16	motif20
GbNAC175	Gbar_D05G025020.1	V	D05	motif1	motif3	motif7
GbNAC176	Gbar_D05G029720.1	V	D05	motif1	motif6	motif12	motif17
GbNAC177	Gbar_D05G029750.1	V	D05	motif2	motif3	motif8
GbNAC178	Gbar_D05G032550.1	VI	D05	motif1	motif6	motif5
GbNAC179	Gbar_D05G032770.1	II	D05	motif1	motif6	motif12
GbNAC180	Gbar_D05G037310.1	IV	D05	motif4	motif9	motif14	motif16	motif17
GbNAC181	Gbar_D05G037320.1	IV	D05	motif1	motif6	motif5	motif14
GbNAC182	Gbar_D06G004820.1	IV	D06	motif4	motif8	motif12	motif17	motif18
GbNAC183	Gbar_D06G007420.1	VIII	D06	motif11	motif15
GbNAC184	Gbar_D06G011830.1	II	D06	motif2	motif7	motif5	motif18
GbNAC185	Gbar_D06G013190.1	VI	D06	motif9	motif10	motif13
GbNAC186	Gbar_D06G013920.1	IV	D06	motif1	motif6	motif5	motif14
GbNAC187	Gbar_D06G014610.1	VIII	D06	motif11	motif15
GbNAC188	Gbar_D06G015880.1	VI	D06	motif2	motif3	motif7
GbNAC189	Gbar_D06G021700.1	VI	D06	motif1	motif3	motif6
GbNAC190	Gbar_D06G022900.1	X	D06	motif16	motif20
GbNAC191	Gbar_D07G004710.1	I	D07	motif4	motif8	motif12	motif17	motif19
GbNAC192	Gbar_D07G006990.1	V	D07	motif2	motif3	motif7
GbNAC193	Gbar_D07G009000.1	VI	D07	motif2	motif5	motif8
GbNAC194	Gbar_D07G011970.1	VI	D07	motif8	motif10	motif12
GbNAC195	Gbar_D07G014540.1	VIII	D07	motif3	motif7
GbNAC196	Gbar_D07G014620.1	I	D07	motif1	motif3	motif6	motif14	motif19
GbNAC197	Gbar_D07G016420.1	II	D07	motif1	motif6	motif5	motif18
GbNAC198	Gbar_D07G021850.1	VIII	D07	motif16	motif20
GbNAC199	Gbar_D07G023300.1	II	D07	motif1	motif6	motif5	motif14
GbNAC200	Gbar_D07G025350.1	IX	D07	motif3
GbNAC201	Gbar_D08G004410.1	V	D08	motif4	motif8	motif12	motif17
GbNAC202	Gbar_D08G011990.1	VII	D08	motif2	motif7	motif12
GbNAC203	Gbar_D08G012350.1	I	D08	motif9	motif10	motif13	motif14	motif19
GbNAC204	Gbar_D08G014330.1	VIII	D08	motif16	motif20
GbNAC205	Gbar_D08G018030.1	V	D08	motif2	motif3	motif8
GbNAC206	Gbar_D08G019440.1	I	D08	motif4	motif9	motif14	motif16	motif17	motif19
GbNAC207	Gbar_D08G021430.1	II	D08	motif4	motif8	motif14	motif16
GbNAC208	Gbar_D08G024770.1	X	D08	motif16	motif20
GbNAC209	Gbar_D08G025710.1	I	D08	motif2	motif3	motif7	motif14	motif19
GbNAC210	Gbar_D08G025820.1	V	D08	motif4	motif8	motif13
GbNAC211	Gbar_D08G025830.1	I	D08	motif9	motif10	motif13	motif18
GbNAC212	Gbar_D08G025990.1	VI	D08	motif8	motif10	motif16
GbNAC213	Gbar_D08G026000.1	VI	D08	motif1	motif6	motif5
GbNAC214	Gbar_D08G026010.1	VI	D08	motif1	motif6	motif5
GbNAC215	Gbar_D09G000410.1	III	D09	motif10	motif13	motif20
GbNAC216	Gbar_D09G001640.1	VI	D09	motif9	motif10	motif13	motif18
GbNAC217	Gbar_D09G003230.1	VIII	D09	motif11	motif15
GbNAC218	Gbar_D09G005270.1	II	D09	motif4	motif9	motif14	motif16	motif17
GbNAC219	Gbar_D09G008060.1	IV	D09	motif1	motif6	motif12	motif17
GbNAC220	Gbar_D09G010460.1	VI	D09	motif9	motif16
GbNAC221	Gbar_D09G010540.1	VII	D09	motif4	motif8	motif12	motif17
GbNAC222	Gbar_D09G011960.1	III	D09	motif9	motif10	motif13
GbNAC223	Gbar_D09G018050.1	V	D09	motif16	motif17	motif20
GbNAC224	Gbar_D09G019490.1	VII	D09	motif2	motif7	motif12	motif17
GbNAC225	Gbar_D09G019610.1	I	D09	motif2	motif3	motif7	motif14	motif19
GbNAC226	Gbar_D09G025620.1	X	D09	motif16
GbNAC227	Gbar_D10G002990.1	IV	D10	motif2	motif8	motif12	motif17
GbNAC228	Gbar_D10G008280.1	IX	D10	motif3	motif20
GbNAC229	Gbar_D10G008480.1	VI	D10	motif9	motif10	motif13
GbNAC230	Gbar_D10G021820.1	V	D10	motif1	motif3	motif6
GbNAC231	Gbar_D10G024940.1	III	D10	motif4	motif8	motif12
GbNAC232	Gbar_D10G025100.1	III	D10	motif1	motif3	motif6
GbNAC233	Gbar_D11G001610.1	VII	D11	motif10	motif16	motif17	motif20
GbNAC234	Gbar_D11G002940.1	V	D11	motif4	motif8	motif12	motif17
GbNAC235	Gbar_D11G003590.1	II	D11	motif2	motif7	motif5	motif18
GbNAC236	Gbar_D11G004190.1	IX	D11	motif1	motif6	motif12	motif18
GbNAC237	Gbar_D11G004590.1	I	D11	motif2	motif3	motif7	motif18	motif19
GbNAC238	Gbar_D11G006270.1	V	D11	motif2	motif3	motif7
GbNAC239	Gbar_D11G007250.1	VIII	D11	motif11	motif15
GbNAC240	Gbar_D11G007690.1	II	D11	motif2	motif5	motif8	motif18
GbNAC241	Gbar_D11G011020.1	I	D11	motif4	motif9	motif13	motif14	motif19
GbNAC242	Gbar_D11G011200.1	VIII	D11	motif20
GbNAC243	Gbar_D11G011210.1	VIII	D11	motif16	motif20
GbNAC244	Gbar_D11G014400.1	II	D11	motif2	motif7	motif5	motif14
GbNAC245	Gbar_D11G018400.1	V	D11	motif10	motif13	motif20
GbNAC246	Gbar_D11G019150.1	I	D11	motif1	motif3	motif6	motif18	motif19
GbNAC247	Gbar_D11G026410.1	II	D11	motif4	motif8	motif12	motif14	motif17
GbNAC248	Gbar_D11G026430.1	IV	D11	motif14	motif16	motif17	motif20
GbNAC249	Gbar_D11G031330.1	II	D11	motif1	motif6	motif5
GbNAC250	Gbar_D12G001480.1	X	D12	motif9	motif13
GbNAC251	Gbar_D12G003830.1	VI	D12	motif2	motif5	motif8
GbNAC252	Gbar_D12G006250.1	I	D12	motif4	motif8	motif13	motif18	motif19
GbNAC253	Gbar_D12G012670.1	I	D12	motif10	motif16	motif17	motif18	motif19	motif20
GbNAC254	Gbar_D12G015150.1	VIII	D12	motif11	motif15
GbNAC255	Gbar_D12G017710.1	IV	D12	motif14	motif16	motif17	motif20
GbNAC256	Gbar_D12G018360.1	VIII	D12	motif11	motif15
GbNAC257	Gbar_D12G019250.1	II	D12	motif9	motif10	motif13	motif18
GbNAC258	Gbar_D12G019560.1	X	D12	motif16	motif20
GbNAC259	Gbar_D12G022870.1	I	D12	motif2	motif3	motif7	motif14	motif19
GbNAC260	Gbar_D12G025120.1	I	D12	motif4	motif9	motif13	motif18	motif19
GbNAC261	Gbar_D12G025270.1	VII	D12	motif1	motif3	motif6
GbNAC262	Gbar_D12G029510.1	V	Scaffold731	motif4	motif8	motif12	motif17
GbNAC263	Gbar_D13G005480.1	X	D13	motif12	motif20
GbNAC264	Gbar_D13G007590.1	VI	D13	motif10	motif13	motif18	motif20
GbNAC265	Gbar_D13G011160.1	II	D13	motif2	motif7	motif5	motif14
GbNAC266	Gbar_D13G013220.1	I	D13	motif2	motif3	motif7	motif18
GbNAC267	Gbar_D13G013730.1	V	D13	motif1	motif3	motif6
GbNAC268	Gbar_D13G015720.1	IV	D13	motif4	motif8	motif12	motif14	motif17
GbNAC269	Gbar_D13G016100.1	II	D13	motif2	motif7	motif5
GbNAC270	Gbar_D13G018130.1	IV	D13	motif1	motif7	motif5	motif14
Subdomain A: motif3, 5,12, 13, and 16; Subdomain B: motif17; Subdomain C: motif1, 2, 4, and 10; Subdomain D: motif6, 7, 8, 9, and 20; Subdomain E: motif14 and 18.
