# Supplementary material for: Systematic analysis of NAC transcription factors in Gossypium barbadense uncovers their roles in response to Verticillium wilt
Source: PeerJ. 2019 Nov 5;7:e7995. doi: 10.7717/peerj.7995 (PMC6839521; doi:10.7717/peerj.7995)
Supplement: Table S6 [file peerj-07-7995-s009.xlsx]

## Sheet: Sheet1
Table S6. Promoter sequences of 270 GbNACs
>GbNAC001
TAACATTAAACTTAAATTATTAAATTCAAATACTAAAGTAATTAAATCTTTAAAAAAAAAAAGATTAAAAGAGTGCTAGAACTAATAGAGCAAATACACCTATATTACAATTCATTAAAATCAAACCCCTTTCATGAGGTCCTTAATTTTTTTTTATATTTAAGTATAATAGAGGGGGAGACAGAGATTTTTTTTTTAATTTTCATTAATATTTTAAAGAGAGAAATAAATTTATAAGTTGTATTAGAATAAAAGTTTTATGGATATATTAAGAGTTATATAGCTTTTGTCTTTTCTACTAAAAAATAAATAAATTAAACCTTATATATTAGATAAAAATGAATAGAATTTCTAAAATTAGATTGTTTTTGTTATCTAATGTATACTTTTTTTTAATAA…
>GbNAC002
AAAAACAGAAAGATTAAATTCTTAAAAATAAAAACTAGAGACTAAATATAAAATTTTGGAAGAAGTATAGGACTGATGGCACATTTTAACTATATAATGGTAATTTTTTCTCAAAGCTGTGGGAGGAAAGAATCTTTCAAATGGGTTCCTTGTATGGAAGGGGAAAATGGATATAATTCAAATTCCATTGAAGAATCTGAGAAAAAAGAATCTACTGGTTCTGGTTCTTCTCCATCATCTACTACTACTAATGGTGTTCTCAAATTTGGATGAGAGCATATCCAATGGAAAGCTTAAGGAGTTATTCTCAATATAGTACCATAACATCATGCAAGATCGATTATCGTACTTGATTAAGTTCGATTAGTTCTGATAATCATTTGGCTAAAGCGTATGCTT…
>GbNAC003
CTCATCCATGAGAATGAATCACATTTTATGACTAATCGTTTACTTCTTTAGAAAAGCGTATGCACCCACCCTAAGCTCAATCCACCCTTTTTCATTATTAAAATATTAAAAATTTATTTTGTTTTCATTTTTAAATACTTAAATATATTTCATTATCACTTTTAAAATATTAATTAGTAATATAAAAATCTTTATCAAGGCTTGGCTCGGCTGTACTTGTAGCAAAGCTTAAGCCGAATTAACTTATTGATTAAGGAAAATGTCAATAATATTCAATCAAATTTTAGCCTATTTATTATACGGTAAACTACATCTATGGTCACTTTTGTTTACCTTAGGTTACATTTTAGTTTTTTACGTTATCGTGTTGTAACATTTTAGTCACTGAGCCGTTAATTG…
>GbNAC004
TTAAATGTCATAAAGCTTTGCATAGAATTTAGATAAGGTCTTATTGTCATACATTGTTAAAGTCTCAAATCTCGTAGTCAGCATTTGAAGTTTGGATTACTTCACAATTGGTCCTTTATAAGTAGTTTCAAGAATAGTCTAAGCTTCTCTAGCAAATGATCATTTAGATATTGACCTAAAATCTTGAGGATTAACTCTAGAGAAAATTACCTTAAAGTCTTAGAGTTTGCATTAGCCAATTTCTCTTCATCATTAGTCTAAGTTACTTTAGGTTTGAGATTTCTCACACCATATACACTAGTTATTAGTAGCTCCTAACCAGTCAAAATTGAGTGCCAAGATTTTTCATCCATGAACTTGATAAAGCATCATCCTTACCTTCTACTAGGCATAGTTTGT…
>GbNAC005
ATCTACAATCAAGTTATTCACACACTTTTACCCCGAATTAATAATCAAATATCACCACAACCACAATCAAATCAAGCAAAAATACAAAAAAAATAACAAAAAAAGGAAGAAAATCTTTTGTTCAATGAGTCCTAAATAAGACCTCTAGAAATAAAAGGGCGTAATAAAATCAAAGAAAAGAGAATCGAAATACAAAAGGAGAATTAAACATACTGGAATCAGTTAAGAGTTAGTCAAAAAGTTTCAGGTGACAAAGGCTTAATGGAAAAAAGTCAATGAGAAAGATTCGCTAAGAAGAGGAACATATTAGAGTCAAACGGTCATCTAACAACGATGGATAGAGATCAGAAAGCCTTTTTGTAAACCGATAAGGTTTTAGACAATTATAAGAAAAAATAA…
>GbNAC006
TATTTGATTATGTAAATTTCCAGGGTTTAAAATTCGTAATAAATTATGGCCTCATAATTGCATCACCCTTGAAATCACAAGATAAGTTTTTGTTATTTTTGTATTATCTATATTTAAAATTGAAAAAAAAAATTGAGTTTAAAATTTTTTAGTCTTGATTTGATAATAATATTGAGCTGTTTTGAATTTTATTTCTCCTAAATTATATGTAGATTCTTTTCAAATTTTATTTTGATTTAACCTTTACATTAGTAGATTATTGAATTGTGATAATAGATGTTGATAATGGTAATAGAATGAATGTAAAATAAGCACACACAAAAATCACGGGCAGAGTAGAAGAAATTCACAAATATTGAAAAAGGAATATACATACAAGAAGAGTTTCGACTACATCTA…
>GbNAC007
ATATTTGAGCATAATGTAATAGAATTTGACTCGGTAATTATTATTATTATTATTTCATTATGAATTATAAAATGAATCTAACGCAATAAAAATAAGAATAAAATTATCAAAAATGTTATTTTATCAAGGAAATATAATTACCTTGAAACTGTTGAGAATGTGAGATTTTCAATTAAAAGTAAACATGAAAATATTATATTAGAATCTCACATTACTCCATAAATATTATATTTCATGAACTAAATACATCTTTATATTATTTAATTACTATTAAATTAATTATATATATATTCAACAAACCCACATCCAAATTTTTTTAAATTTATCAAATTAACTGTTTTAATTATTTTAAGATTGAAATTTTAGCTATTTAATCTTAAAAATTATAAAATAATTAAA…
>GbNAC008
CAAGTCGATACTAGGTGAAGCTGGGTGAATATTAGAGTATAGACTCTGTTAGTCTGTTACTGTTTTGTTATACTGTTTTGTTATACAGGCTAAAATATTGTTAGCAAGTAATTAGCAAACAGCTAATTATAGCAGTTAGTCATTTAAGTATAAATTCTATTCATGTATTGTTGAAAGTAAGCAAATAATATCAGAAGAGATTAAACGTGTTCATTCTTCTTTCTTGGTTTTTCTTCATAATACAGTTGTTAACAAACATAGAGTGTTTTAAGTCGTAAATTGATGGCCAGGCCTAGCAGAGTTGACTGGGCCACTCTCCTTTCATTGGTTAGTAGAAATTTGACCCTACATGTTTCCTCTAATTTTTGCCCCACGAGGAGAAAAAAAAGGTGCTCAATA…
>GbNAC009
GTATCATGTACTCTTTAATAAAGTTAATTTTTTTTAAAGTTTTTATGGTTTTGTAAATGATTTTTTTTTAGGATTGAAGTGCAATTGAAACTTAATAATTTTTAATATAATTTATGCTAACTCATATTGATTCTTTGGGATCCTTCCTTTCTTCAAACGGAATAAACAGATATAGAGAATTGGATTGATTTACTAAGTATCTTTCTAGATATTTCTTAATGTCCTGACTATTCACGGAACATGAGAAGTGAATGAATAATCATTTGCTTCTGGAAGAAATCGAAGAATTTCTTGGGAATCCTACAAGATCCATTCGATCTTTTTTCTATGATAGATGGTCAAAACTTCATCTGGGTTCAAATCTACTGAGAGGTCCACTATTGATCAAAAATTGATCTA…
>GbNAC010
TCGATCTAATATTTTTATCATAGCGAATTAAAATATTGTTTATATTAATATTTATTTTTAGTTGAAATTTTTTAATTTATATCGAACTTGACATGCATGATCTAATGAATGGAGCATGAAATATGAAGATTGAATTATTAAAATATTAACTATATAAAAAATAATGAAAAAATGTAAAATTATTTTAATTTTGCTTAGTAAATTTTTACTTGTAATTAAAATATTGAATTGAAAACTTTTCGAGCACTATAAATATAATTAAATTATTAAATTAACCGTGAATTTGTTAAGAATATTAATTATATAGAAAATTATAAGAAGATAAGCAATATTAATTTAATTTTGCACCAGAAAACATATGAGAAGGTCTACTTTTATAATATATATATTTATATATAT…
>GbNAC011
ATTATTAAATTCAAATACTAAAGTAATTAAATCTTTAAAAAAAAAAGATTAAAAGAGTGCTAGAACTAATAGAGCAAATACACCTATATTACAATTCATTAAAATCAAACCCCTTTCATGAGGTCCTTAATTTTTTTTTTATATTTAAGTATAATAGAGAGGGGGGAGGACAGAGATTTTTTTTTAATTTTCATTAATATTTTAAAGAGAGAAATAAATTTATAAGTTGTATTAGAATAAAAGTTTTATGGATATATTAAGAGTTATATAGCATTTTGTCTTTTCTACTAAAAAATAAATAAATTAAACCTTATATATTAGATAAAAATGAATAGAATTTCTAAAATTAGATTGTTTTTGTTATCTAATGTATACTTTTTTTTTAATATAAAAGATAAA…
>GbNAC012
TAGAGAGGGGGGAGGACAGAGATTTTTTTTTTAATTTTCATTAATATTTTAAAGAGAGAAATAAATTTATAAGTTGTATTAGAATAAAAGTTTTATGGATATATTAAGAGTTATATAGCATTTTGTCTTTTCTACTAAAAAATAAATAAATTAAACCTTATATATTAGATAAAAATGAATAGAATTTCTAAAATTAGATTGTTTTTGTTATCTAATGTATACTTTTTTTTTAATATAAAAGATAAAATGCAATCCTAGGCTTTGACCCGATCAATTCAGCCATAAACAACTCATCTTTCAAGTTGAAAGCATTCTTCAAAGCCACGAAATTTCTTTATTTCTTCCTAATTAAACCGATCTATAAAGACAAATTTTTTTTTCATTAAGTTTAATTATAAA…
>GbNAC013
TCGTGTTTATGGCTATATAGCCAAATACAAATTTTCTGCCTCTGTTGCCCTTGCGTGCTGTGTTTTTTTATTTCTTTTTTTAGGTATGCTTGCAGGTTGGGGAAGGTCAACAAAGGGGGGATTTCGTTTTGGTGCAACAAGACAAAGGGAGTCGAGCCTCAGGCGTTGGACATGCCGACGAGGCACGTGGGGGGTGCGGCGCTAGGAAGGCTCAGAAACCTTAGGGTTTCTGAGTTGGTTTAGTCTCTTGGGCCTATGTGTGGGTCTGTTTTGTTTGGGTTAGGGTAGGTTGGGCTTAGTTGGTTTAATTGGGGTTGGGTTTAGTTTGGTTTAATTGGGTTGATGATTTAAGTTTGGGTTTAGGGTTTGTGATTGGGTTTAGGTTTTAGGTAGGTAGTT…
>GbNAC014
TTGTTTATGTTTGAACTTTGAAACATGTGATTCAACTTTAAAAAGCTCATTTAGGTGGCAATTAAAATTTAAAAACGTATTCTATTCAAGTACCAATTATAGTATAAAGACTTGTTTAGGTATAATAAAAGTATAAAAGGTATGTTTAAAATAACGTGATAGAATTCAAAGATTTATTTAATATATTTTCAATTTATAAATTCATTTAATAAAAATATTACAACTAGCAATATCTAAGCGGAGAACGAAGTCAGAAAATTCAAACAATAAGTAGATTCAAACATGCATCTACGATATTTTAATAAAGATTTTTTTCTTACAAAAACATCATTCATGTGGTCAAAAACGTCTCATTAAAAAAAATTACTTACAGACTATTTTACGAATTTCTTCATAAAG…
>GbNAC015
TCATATATTTTTTAATTTTTATATTTTTTTGATATTTTTACTATTTTTATAATTTTTTTTTCTGATTTTTATAATTTTTTAATATTTTAATGGGAAAAATATTAGTTTTCAATATTTTAATGAGAAAAATATTAGATTAACCCAGAAGTTGCAGCATATCACCATTTGATTAGTTCATCAATTTATTTTAACGGTCAACGTGAACAATGACAGGAATTGTTAACGGATGGGCTTAATTGATTATTTTAGTTAATAGAAATGACTGAATTGAGTGCAAATTTACTGCATAAACTTAATTGATTTTTTTTTGCATATTTTAAGGACTATTTTTGACAAATTGTCTTCTTTCAAAAAACATAAGACCATCTTTTTAAGAAAAAAAACTCCCTTATAAGTAAT…
>GbNAC016
AAGTGCTTCTTAAGGGAGGTAAATCTTCCGAATGGGACAATACTTTTTTTAAGAGTCCGATAGCCAACTCTCTCATCACTTTTATAATAAATTTGTAGATAACAATAAAATAAAACAAAACCAAAAAAAACAAGCAAAACTAGGAAAAAGGGAACTAGTAGCTTGAGATGTATATCCCTTTTAAAATGACTTGAAATGTGGTGTTTGAATACATAAAACGACATGGTATTCGGAAAGCAAAAAGTGGCAAATATTTTTTATTTCGTCAAATATACTATTATGAGATGCTTTTGCCTCTATACCATCTTCAACACTCCATACATAATTTATATCACTAAATTTCTTTCTCCTAAGTATTTTTGTTTTTGTAAAGTAATTTAAATCTACAAATATTTAAAT…
>GbNAC017
CGAAACACGACCGCCAGTTAATAAACTCGAGGTAAGCTTCTACATTTCTGCATGAAAAAGAAAACTCAAAATCTTTTCAAGACAATATTCTTTTCATTTAGTATCGTGTTCGTGTCATGTCACCATTTGGTAATGTTAGAGTATATACAGAAGATAATCCTTAACTGGTCTGAAATCTTACAAGATCTTAACTGGTCTGATTTTCCCTATGAAAACATGAATGCCATTGACATTATAACCTTAAAAAACCAGAATATAATCAGTTCAGAGTGTCATGTTTTGGATTTGAATGTATGAAAAACTATATACAGCAAAAACCCAGAAACTATTTTTTCTGATTTTAGGTCAGTTTTTGTGTTATGGGAATTCTCGACAAACAGATAAAAGTTTGACAGTGGC…
>GbNAC018
AGGTTCAAGCTCAAACTTAAGTTATTGAAACCCAAGTATAACTCATAATTTAAAGGGTAAATTACATTGTATGTCATTAAACTATTAGTAAGTTTATGTTCTGGCACCTCAACTTCAAAAAGTTACAAAATGGTCACTAAACTATTAGAAAGTTTTCATCCAAGTCATTGAACTATTCAAAAGTTTTTATTTAAGTCATTAGGTTGTTAATTGTTTTTTTAAAGTCCAGCTAGCAAGCTCCAAGTGACGATTTGACGTTCGGTACGATGGGTCAATAGACATCAACAAGTAGAAGAACATATTTTAAATTTAAGTCAATCAGATGGTCAGTGTCGAATATCATAGAAGAAAATTGTTTGGATTTTGATTAGTAAACTCGTGATGTCCAAACTCGAATAG…
>GbNAC019
TTCAACTCTCAATGGGTAATTTTGCAAATTGGGACATTCAATCAAAAAATAATTGAGCTTCCACTAAAAGTGTATTTGGACATCCCAAAAAAAGTTGCAAAAAACTTGGTAAGCTCTTTTGAGAGTTTCTTTTATTATTATTAATGTTTTCTTTATAGAAGTGGGGCATTACATGTCTAGATGACATAAACAACCACATAAAACAAAAGCAAAAAGTGTTTTGTCTGACTCAAGATGCAATGGAAGGAGCTTAGCCCAAGAAAACCCAAATTCCCCCCCTCTACGCTCCTTTCCTCTGACTACTATTCTCCATTTATTTTCTTTTTTCTTTTACAAATAATTTATTTTCTTTAAATAAAGGGTAAGTTACACTCCTATATCTTCAAAAAATTATAAAAT…
>GbNAC020
TTATAATCAGAAATTTTATTTTAATTGACTTTATATTATATATATATACTTATATATATATACTTGGAGGCTGCCATTAACGAAGAGCATGTGAGATCATATTGAATAAGGGTAAGGGTAATATATTCCGGTTATTATTAGGAATCTGATGGTGCTCACCACGCGGTGAACAACAAAGATAAGATTACCGAAATACAAAAAGAATTGAATTTCTTACTTAATAAAGTGAATTTTTTTTTAAGAAAAAAATCTCCTCCACCACCACATAGTTATAATGTGTATTACCTATAGTCTTTCTTTAATCCATAAGTAAAAGACTAACACGCTTCGGTATACTCAAACTCATGACCTCTTGTATTAGCAATATTATTCATACCAATTGAATTAAAATTTAATCAA…
>GbNAC021
AAATTTAAGAAGACAACTATTCCTTTACCATCCTTATGAACATAGAGATAAAATAAATTAATCAACATAATTATAATTAATTATGAATTAACTAATTAAAATATTAAATTAAATATAAAGTATTAAATAAAAAAAAAACTTCCTGAAAATGCTATATTTTGTTGTCCATGATTGCGAAATATAAATTTGATCTTCAGTCCTCGATCGATTGAATAAATCTGATTAGGTAGGAATAAAAGATTGTTATAAATTTCATAACACATATAATCTAAAGATTGTTTGGCTGAACGGTTGAGGTAAAGAGCTGGAGCCTAAATGAAAAAAAAATTAGAAGAGAATTGTGTTGATAGTATCTTATAAAATAAAAATAAAAGAGAGTTAGGAACAAACAAATTGGGG…
>GbNAC022
AATACTAAACACTGGCATCGGACTTTTACGGTCCAAATATATAAATTTAATATATTTCAGCTTTGTGTATTGGGAGTTGGTTAAATAATTCAAACCCAAAAACTATAAATATATATATATTTATATGTGATTTTTGGGATTTCATTTGTCTTGACTTGAAATTGGATAGGCAAAAAGTATCATGGGATTTGCATTAAAAAAATTTGCAAGTTATTATCCCTAGACGCTGCTGATTTTCTAGCTTCTTGAGATTCTTCCATTAAACAAAACTTCAAAATTACAAGTAATTACAAAATATGAGTTTGTTGTAGAATTTGATGGACCCTTGCTGATTCAAAATGCTAAGAAGTTTGGTTTTTTTGAGTTTTGAATTTCTCTTGTGATGGAGGATTTTTGCTT…
>GbNAC023
ATGTTGACTTCATGAAAAATTTTATATATTGAAGGCTTAAATAAATTTGTTCTAAATGTTTAACATAAATAGAAAAATATTTTTAAAAAATCTACTAAAATTATGCATTAATTTATATAAATTTTTTTATTTGTTTAAAAGTTTTGACCTCCAATCTAAAATTCCTAGTTACTGAAGATAAGGGGAGAGGTAGGTGACACACTTGGTCGTCTGTTTTTCAAAGAATAATTTAGATAAGATGAAGATGTTGAATAATATAGTTAGTTGGTTGGATGTGTTTTAAAAATAAAAAACAAAAAGAATGGAGGAGGGTCTAATCCCCTAAGTAGCATGCTCAAAACACAGTGCTTGGGGGATCCAACCCTCCCTGCTATTTTGAGAAATGATATAAAATGGGAT…
>GbNAC024
ACCTGCTTCAAACTAAATATCCTCATTTTCATCCTTGAGGACAAGGATTTTATCTTGGGAAGGGAGTATTGATGTGAGCTAGAATGGCAGACAGCAGGAAGTAGAAGATTAAGGAAATAAAGTTAGTTATAATCAGTTAATCTCATTTAAGCAAACGAGGAGTTTTGATCTTTAGTTAAACAGAGAGTTTGGGGTTTAAGGTTAAAACAGTAAAACGCAGCGTTGAACATTAGTGAAACGATGCGTTTGAGTATAACAGATTTTGCCAAGCTGTTTTCTTTGTTATTTTTCTTATTTAGCACGAGTTGTATGGGAAAAAGGCAGTTATGAAATATATCCAGAAAATTTAACATTCTCTTCTTCTTCCTAGTTTTTCTTTTCTTTCAATTCTTCTTCTGC…
>GbNAC025
AATTTTGTGCTATTAGCTTGGTTCATATTAAATCAAATTTGAATGATTTTTTTATTTTTAATTAGATTAATTATATATAAAAAATATTTTTATGTAAATTTAATTATAAAGTATATAAAATATTAGAATAAAATAATTTGTAAATAATGATAAAAACTCTGAATCGACCCGATTTGAGTTGGGCTTAGACAAAGTTTTTTTATGTCTCATACTGTGCCAACTTGAACTCAATTTAAATAATAATAAATATTTTAAATTAAATCTAGTTACAAAATATTAATATAAAAATATTTTTAATATTTTATTTTTTTAACGGTGAAATGAAATTTTGGTAATGGTGGGCTGAAAATAGTTTTGGGCTTGAATGTCTTTGTAACTTGAGCAATGAGTCGGCTTGGC…
>GbNAC026
CATCATCGAGTGGATATATATTTTGCTATGATAGATACTTAGTTGCTAGAATTGAACAATAGATTTAATGAAACTGTAGCTTTAGATCCTAAAGAATTCTTCAAGTTCTTTGGCATTGAGAAAATTTGTGCTCTCGTAAACAAGTTCTATTCAGCAGATTTTTCTCAACAAGAGAAAGAGCGTCTTTCGTATGAGTTGAAACATTATGAGCTCGATGCTTGTCCATATACTGAATTGAGAAAAATATTAACACTTTTTGATCTTTGTAAAAAATTAGTTGAGAGTGAGAAGTCAATTAACTATCCACTTGTTGATAAGTTGATTCATCTTATATTGACTCTTTCAGTTTCAATTGCATTTATAGAACATGTTTTTTCAGCTATGAAAACTGTGAAGACT…
>GbNAC027
ACAATCCTCTTTAAAAGTTAGTAACACTTTTTATATTATTTGTAGAGTCGTCAAGTCAACAGTTTAGTAATGATTCGATGAACATGCTCCCACCACATGTTATCTTATTCCTCAATTATTTAATACTCTCAATCTCTGAAATTACGGCTTGACCATTTCAAATTTTCATTTAAAATACATAAAATATTGAATAAAAATATTTTAAAATTTAAATCCATCAATTTAAAATTACTATTTAGTTAATTAAACATTATTTACAAAAATATATGAATAATTATTTAATACAAATGACTTTTTTTTTAATAGGCGAGTGATTTTACTGTTTTTTTTAAGTTGTATTTAAATAAATAAATAAAACAAAATTTCAAATTCTCTTATAGAGTTAAAAATTTTCTATCA…
>GbNAC028
TATTATCTTTTTGTTGCCTTGTATGGGTTGTGGTTCCCACCCTCCACTCCATACCTCACACGTATTACTCCCTCTTTTGGGAATTACACGTTTCCATCCTCCATTCGGCTCAAATATCCTCAGTTGTGGTAATTATATGATTCCATACATATTATTAAATATTAAAAATAAATTAAAATGATTTTTTAAATCTTTATATTTATTTTACTATTCATATTCAAGTTTTATGACTACTTCTATTAATAACGTCGTTTCCAAAGTTTAAATATACATTCTCATTTTGAATGCGTAATGTGTCTAAAGGTGTACATGAGTCGGGCTGAGTTGGGTTGAAGCTCGGTTCCAAAAACATTTCAAGCCCAAGCCCGTTTTGGGTAGCCCAACTCTCTCAAAAATCTC…
>GbNAC029
ATCAAAACAAAAATGTTTAAAAATACATTAAAATTAAGCTTTGGTTGAGTGGTGAATTTATTTATTTTTAATTTAATTAGTGCAAATTCAAATCTCACCATATGTATATTTTAATTAATTTTTATTAAAATAAAAAGACTAAAAAATCTTCAAATAATATAATTTTTTATAATTACGAAAGGTCAATTTCATAATTTTCTGACTAAATTGATGACTCGATTGAGAATAACATCGATTAAGTGAGAGGCTTAATAAATAATATATTAGTTATATATTATGTGAAATGGTTAATAATGTAATGATGAATTATTTGCATGGCTTAAGGTCTTATTGATACAAAGTTTGGTTTAGATTTATACAACACCTTCAAATTATTACTTTTTAAATATATACATTAGA…
>GbNAC030
TTCATGAAAAATTTTCTATGTCCCGATTTGTTTCTAATACATATTTAAAGCCTCGAGAGCCTATAAAAGGGACAATATGATTAATTTATGATATATATGCTATATGATATGATTACTATTCTTATTTGATCTGAAAGGTATGGTAATGCTCTGTAACCCTATTTCGGGGACGGATAAGAGTTAGGGGGTGTTATAAACCCATTCACAATCAAATACAAATTTTATAATTTATTCAATTTAGTCCCTAAAATCGGGACTAACCTAACTTTCAATTTAAAGCTTCAAATTGAATTCTAATTTCACTATTATTCATTAGGCACGTCCTAACAAATATCAAGCTAATCGACACATAAGATGTCATTTCTTTCAGATAACCTCAGAGTAAAAATAAATTGAAAA…
>GbNAC031
CATAATAATAATTTCATAATGTAGGATCGTGAGCGAGTTGGAACTACAAGTAAGCCAAAACAAAAATTCACGCACACAGCTAGGTCGAAAAGTTTTGCCCGTGTAGCTGACGACAAGGTATTTTGAATTTATTAATTGTGTCAAATATTAATTACTTTCTATTAAATAATATTTTTCCTACTATATCGTAGGAACTGTCGCCTGGTCAAAAAGTTGGACGCCTTCAACTTTTTGACATTACACATAGAAAGAAAGATGGATTTTCTATGACTATTGAAGCTGCAGAAATTATGATATATTTACTTAATAAAATTTGAATTGTTTTAAATATTTATCATGTTTAATTATAATGGTTTAATTTATCGTTTGTAATGCAAATAATTTTAAGTTAGGTTGCAT…
>GbNAC032
CACTCTCTGTTGGTTGATTCATGGATCCAATACATTCGTGGTTATTTTTTTTTTAAGGTTTAGACTAGATAATTCAATGACTACTATGTGTGCTGACAATATGCTCCAATGATTGTGAATTTTTTCGTCCTTTACTTTGTATCGGAGTTACAAAAGGATTAGAAGAATTAGTCATTAAGATTGCAAAAATATGGACATGTTTTAATTTTATTGGTTCGACCCATAGGATATGATCCAAAGGGTCAATCTAATAATTTTTCACAAAACAGTTATTTGCCTATTTAATGCCATATATTTATGAATACTCCTTGTCACCTAAACGGTAATCTTAATTACTTCGTTAATCATTCATTTACTATTATTTTAAAATTTTCATGCTATCAAAATAAATAATTGAAT…
>GbNAC033
CCAGCCCATAATTCATAGGGAGTTGATTGCAATAGATTTGGAGGGTATCTGATTCCATACATAGCCATCCTTCAGTAAAGCATCACCACAAAAGGTGATGGGAAAATCAGCTTATGTCATCATAGACCTGACCATTTGTAGAAATGTTTTATTTATTCTTTCTACAACACCATTTTGTTTTGGAGTCCTCGAAATGGTTAGCTGCCTATCTATCCATTTTTCATCACACAAGGTTTTGAATTGATTAAACAAATATTCATGGTCTTAGTCAATTCTTAATTCCTTGACAATTTTATCTAATTTATTTTCCACTAATGTAACATATTTTCTGAAGCTTAATCGGTTTGGAAGATTGTCGAAGATATATCACACTATCCAACGATTATATCGGTAGTTTTT…
>GbNAC034
AATTTGGTTGGATTCACTCATTTTCACTGTTTGCATTATAAAATATTTTAAAAATATGTTAACATTAGTATTTTACTCTAAAATATTAATGTTAATAAAAAAAATTCTTTAAAATATATTTTTACTCACAATTTAAATTATTTAAATTCAAATTAAATCAAACTAAATTAAAATTAAAAAATAAAATTATTTCAATGAAGCATTCGAGATAGAAACAAGTATAGACGGAAGTGGCTGGTAGAGCCAAAGTATATAAATGGATCAAGCGTAGGACAAATTATGTATGAAATTAGAAAGATGAAGATTAAGCTCAATCAAAATAAGATATTGCATAATTGCCCATTTGCATACCAAGTAGATTTAGCCATAAATTGTTTATGGTCGACAGTCATTCTAGGT…
>GbNAC035
TTGGTTATTCTAAGAAAAAAAGCAATGCATTGAAAAATTTTCATGGATCGTTTTTAATATAATTATAATACAATTACAAATATACATGTTTTTGAATAATTATAAAATAAAATCAAATAATTATAATATAATTACAAATATACATATTTTTGAATAATTATAAAATAAAATCAAATTATTATAACACACAATTAAAATAATCTCGTACAAAATCCATCACATAAGACAAATGTGCATGAAGGAATTCAAACTTCAATACTATAAGACACAAGGCTTTAGCCTTTGTCAACAATGCCAACGCCCTAATTAATTTATTTTTTATTTACTTTGATATTGACATTAAAATTCACTTAATAGATTTTTTTTAATTAATTGAAAAAGCAAAGTACATACTAAGTA…
>GbNAC036
TTACCTTAAATTGCAGCCTTATAGACAACATACTATGAGGAAGCTATGAAACCAAAAGCTCTCCCCAAATTATGTTGGGCCCTTTCCAGTGGAAGCAAAATTGGTGTTGTTGCCTACAAGCTAGTTCTGCCAACAGGGTCTCGAATCCATCACACTTTCCACGTATCACAGCTCAAAAAACACATTGGTCGAGCTCCTGTTTGACCTAACCTACCCTTGGTTGGTTCCGATGGCGCCTGCAGCAAAGAACCAGTGAGAGTCCTAGATCGAAGGATGGTTTGAAAAGGGAATTGTGCTGCTACTGAGGTATTAGTTGAGTGGGCAAACACATTTCTAGAAGATGCGACATGGAAGAACCTGCAAGAGCTTCAACAAAAATTTCCATCCTTTAATCCTTGA…
>GbNAC037
TATTTGTTATTATTAAAATTGAAAAAAGAAAAAAAAATCCCTTGCGGGATATATTCTTCCCTGTCCAATAAAATTACATAATTCTTGCAGTAATAATAAAATCAGATAGAAAAGAAAAAAGAAGCAATCATGGCGACCTATCTGTTGTGCCCAACATATTTTCGTCCTTTCATCATTCAGTCCCTTAATTTCATCTGATCAAAATTTTCCATATTTGGGCCCCACATAATCTGGGTCTTTCTTTCATTGTTCCTCTCACTTGGACTCTATTATTTGTGCGAGTGTTATACACTTTTGACTTTCCCTTCTTCAAAAACGATACAAAAAATCGAATATCAATTATATATATTTTAAAAATAACAACAGTTAAGTCTAAGTCAATATAATTAAGAACTAATT…
>GbNAC038
TGGCTTGAAATTAGTCTACAAGATCAACATAGTTTGGTGTTGAGTGATGTGGAGTGGCCTAGTCTTTTCGGCTTTATTGCATGGCGCTTTTGGAAGAGCAAGAATCTCTTTGTTTTTCAGGGTAAACAATAGAGTGTGAATGAGGTTGTCAAAGTCTCGTTTAGTTGGGTTAAACTGTATGCTTCCTTTCATAAGGAATCAAGTGGCAACAGGTTAGAACTGTAATCCCTTGGACTGAATAATTGGGTTCAGTTAAATACTGACGGTACTATTAAGGTGAATTTTGATAATGCTGCTTTAGGAAGAGTCTTGCGTGATCAAAGAGGAAAGTGGATTTTGGGATATAATTGATACTTAGGAAAGTGCTCAGTTTTTTATGTTGAACTATGAGGAACTTTA…
>GbNAC039
GAAAATGAGCATTATTTGCCTGCCAATATCCCCAAGCTTAACATAATACTTGGGTGGCTCATTAATCCTTTGGTAAGTAAAGGAAACAATCATTAGGTGAGTTGTATGAAAATTTGATGTAATTTTCCCATTTGGAAATTTCTCACCCAAAATGAAAATGGGGTTAAATTTTGGTATGAACAAATAAAAAGAAACTGAGGAGATGCAGCCAAAAGCTGAGGAGGAATGGGACAATTATTTGTATGGACGCAAATAAAAATATTCATATTTGGTTCAAACAATAAAAACAAAAGAAAAAGAAAACCCTAAAGCCCATACGTTAAAGTTTGAAAGCTTAAGAAAGAAGTTTGATGCAGTTGCGTGGCTTCTCGGAGAAGCTGTCTCAAGCTAACAGATAAC…
>GbNAC040
TTATGATATCTGTATTGCAGCACAAATATGTTTCCATGAATGAGCGCGATAGATTGACGGCATCCGTAGCTCCTCATGCTTGCAAGATGTATGTTCTGACACCACTCCAAAGTTGAAGGAGGCTATCATTTTATTGAACTTTTAGGATAGTTTAGCATTTTTTATTTTTGTGCATAGCCCCCTTTGGATCTTTTTTTTTCCTTATTGAGTGTTGAGGGAGAATCTAGTAAATGCAAAATAAATGATTTCATCTGAAGCAAATAAAATTCAATTATATTTGAGTCAGGGTATGATGAATCGATTTTAATTCGATGTCTTGTGATATGAACAAAGTATATGATCTTGTCAGCTATATAAACCAACGTGCTGTTACCCGAAAAGCAAGTTACTTGGCTCTGG…
>GbNAC041
CTTCTGTTCTTCTTCTTCTTCTCTTCTTTTCTTCTCCATTGGTGCCGCCTGTGACAACCCCTCCATTGGTGCCGCCTCTGGCACCCCCACCACCGGTGCCGCCTGTGACATGCCCTCCACCCATTTTATTATTATTATTATTTTTTTAACTGTGATGGGTCAGAAATTGACGGTGGTGCCACATATGCACCACCCTCCACTAGTTCAAACATACCATTTCTGTAATTTATATTTGAGAAAACCTATTTTTTATTTTTATTTTTATAATATTATGGTAAAAAACCCTAAGACGTAATTATTTATCATACATTTTAATAAGATAGAAATTTCACATCCGTAAAAAAATTGAAATTATGAACTAGTGCTTAATTTAGTGGTTTTCGTAAGAGTATTTATTGT…
>GbNAC042
AAGTTAAATTATATTTTGTTTTATTTATTGAAAAAATAGATAAATTTACCTGTGTATTAAATTAAAAAATAAATTTATTTTTCTTTTAAATTTTTTATCAATTTTTACTCCTAAAAATTAATCTACATATATTAAAATAAGAAACACATGATATATCATATGTAATTATATTATTATTTTGTTGCTTAAATTAATTATTAACATGAACTAATTAACTCTTTAACTAATAAAAAATCAATTTACTCATAATTTAAATAAACAAATTATAATTTAACTCCTAATACATTACCAAATTAATAAGACATTCTGAGTTTTGAATAAGTTTACTAATTACGATCCTTACCAGTAATGGATGTTACGTAGGTAATAAAATAAAATCTAGAAGCTTCAGCCGTTAGC…
>GbNAC043
CCTATCATGTTGTTTAAAGTTTCATAAGCTTCTTCAAGTTTCATAACCTTAATCTTTTAAGGAGAAATGATTGTATGAAATTGTGATTTCATGTCATCCTTATCACTTTCTAATTGTAAAATGATAAATCAGATTTTTCCCTTTCACTTTTAGCATTTTTAGTTGGATTTAAATTTTTTTTAAAAAGAAAAAAGCTGAAAATGATGAGAAAAAATCTAATTTGTCATTCTGGAATTATAATTTTATATAAACCTTTCTATTCTTTCAAGTTAAATGTAATAAAAAATTAACTGAAATTCCTAATTAATAGTAAACTTTTAAAAGTAACGACCAAGTTATTTAATTTTTAAGAAAATAACTAAGAAATTTTATTCAATTAAGATTCTTGTCTAATTTTCC…
>GbNAC044
CAATAAAATTAATCAGCGCACCATGTTTATTTTTTATCAATCATATTTCTTATCATATGAGAGTAGTTCAATGAACATATCGAATTGATAAATTTTAAAAAGAAATACTAATAATGTTAATGATTAAACTAAGCTTTTTAAATAAAAAAAAAGGTATGAGTTATTTTTTTTTATCTATTTGAAGTATAAGGATTAAAGCTAATATAGGAAGAATCAAATCAATAATGGAATGATTTTAAGTTGAATTGGTTGAACAGTGAGTTTAATAATAAATTTAAAAAAATTATAAAGGGTTGAATCAGTTAAATTTATGGTATTTAAACATTGTCAGATGAGATGGTGGACCGTATAAAGAACAGAAGGATGGGGCTTTTCAGTTTTCCTGTTATTGGGCTTACA…
>GbNAC045
AATTCCGGAAGGTAAGAATTATAAAACATTAAATATCAAATAGTTCTAGTAAGCTCATAATTTATTAGTAATAATTATGTTTTGTCAAATTATAGGTAAATATTATCTTGCTGATGCTAGATATGACATTCGAAATGGATATATTACCCCATATCGTGGTGTTCGATATCATTTAAAAGAGTTTAGTGCCCAGGGCCTGAAAATGCAAAGGAACTCTTTAATCTTCGTCATTCATCATTGCGAATCACTATTGAACGTGTTTTTGGGATTTTGAAGAAATTTCGTGTATTAGATGCTGAACCATTTTGGAAATTTCAAACTCAAGTAGATATAGTTTTGGCTTGTTGTATCATTCATAATCATATAATGGGAGTTGATCCTAGTGATTTACTTAATCAA…
>GbNAC046
CACCTTGCACCTACCTCCAAGTATATGCTTCAACAGGAATCACTTACACAAGGGTAGATTGATACAATATAAACCTCTGGTAAAATGCCCCCCGATAACTCAGAGGATAAAGTACATTACATAGTCCATTTTAGAGATTGGCGACTTAACCATTCCGTGACTTTGGCACTAGACGTTCCAAAAATGGGTACTATCGGGTCGGGTGAATTCAATAATATAGACGCCTGGTGGCATTCCAGCTTTCCTTCTCCTTTCAGGACCTATCCCAAAGAGAATCCAGTACTTCTCGGTCGTGAATATTTGAATAGGGCGAACCACCCCGTGGATATCTTTGCTTCGGAACAAAACAATTAGAATATAATTAGGCTCGATCAGCTTGAATGTGTATTATCCATATAT…
>GbNAC047
GACGCATTTTGGGGTTTTTCGGCTCATTTTAGTAAATAAAGTTTAAAGTGAACTATTTTCGTAAATAAAGTAGGAAATTAGCCTCTCTTTTTTTAGTAAAATGGTCATAATAATGGGAAATCGATACTACAAAACATTTACAACAATCAACGGTTCTTAGGGCTAGTTTGACAATGCTTTTGAAAAGTGCTATGGAAAAGTGCTATGGAAAAGTACTTTTGAGAAATGTTTTTGAAAAGTTTGGTTTAAAACTTGAGTGTTTAGTATTGCTATTTAAAAGTGCTTTTGTGAAATAAAATGTCTATTTTAGACATGTTATTATCAAGTAACAAATATGCAATTAAATAATATTTAAATTAGTTAATATTATTATATTTTAGTAAAAATATAAAAAAATTA…
>GbNAC048
GAATCTATATTTTGTTTATCCATGTTGAATAAAAATTTCAATCGATTGATGAAGCACTCAATTTGATTTCTACGGTTTCAATTCAATAAATATGACAATAGAAAACTAAAAGAAAAAGGAGACGAAGGGTTTTTTTTTCAGTTCAAAATGTGTAATTAATTTTAAATTTTAAATTAATTAAATTTATTTAATTAAAAAATTATTCTCATCCGAGCTTAACATCCAAATTGGCATTTAAAATCCATTTAAACTATCACGTGGGATTGTCGTTAGAGAGGTAACGGAGCTTAACGACAGAGTAACCACTTTGTAACAAAATGATAACGTAAGTAACTAAAATGTAATATTTCAAATAAAAGTAACTAAAATATAATCTGAGGCAAACAAAAGTGACTATTT…
>GbNAC049
TAAAAGTAGCCCTAAAACCTACACACCTGCTACCAGCAGCTGAAGGTGATAGGTAATCTTTCTTTTTTCATATATATATCGGAGTTCGATGCTTTACGACTAGGATTTCGATTTCGAATCATTTTGTTTTGTCCAATTTGATCCAAATAGTTGAAATTTTATTGAATATACAAAATTAACCATTTATCTTCGTTAATGCTGATGTTGTTATCTTTTACTACACAGTTGAGAGACAGCGGCAGCTTACGACACCCCTTTTAATTTACCTCATCATCACATGCCTACACGTGCCAGTGCATCGCCGACATTTCTTTTACCTTTCAAGAGACCCGTTAATTATATGCATCCCCGCCCCATTGGGCAGTAAGTAATTCATTTGCCAATATTACTTTTCCACCA…
>GbNAC050
ATAATTTCTAAATACTAATTTCTCCTACAAGTTCAATCAAAGTACGTTTGTTCTCTTTCTAATTGAAAAATAGAATAAAATAAAATATCCTTTTCTTCCCTTTCAAGTTATATTTGCTGTAGAGATATTAGAGGTGAGTGAAAGTTTTAACTCAGCATTTATGTTTTCTGTTTTAATTTTGTTTCGTTAGTTTTATTTATTATTATTATTATTCAAAATTATAGCATGTTTTTTTAAACATTTATTATTACATTATTTTAGGAAAATTAACAAAGAAAAAATGCATGTCAATGAAAATATAAAGGAGAAAATTTATATAATTACATTTCTTTTTGTCCAAAAGTTGGTCTCGGATAAAAATTTTTACACGAATCGATCCGGTTTCAATTGAAATATTAA…
>GbNAC051
TGGTATAAATTGAAAAGCATGGATTGAAATCATAGTTGAGGCGGTGTGACAGAAAACAACATGCTTTTAAGTGAAAGGAGTGGAAGAAGAGGGCGGTTTCGGCACTTGCTCAGCAACTTCCTTTATCCTTATCCACGTAGACCGTTGACACGTCAACCTTTGAAATTATGTCGTTGAATTTTTGAAATTTAGGTCTCCCCCCACTATTTTATTATAACTTTCCTTAATTACACACATCCTTCTAATTATACCTAATCACTCTCTCCTAATTACACAATAATAACATGTTAGAATTCTTGTATATCTGTTGGATAAAATTGAAAAATATAAATACTAAAATGGGGTTATTCTTGTTATTTTACCATTATATGTTAATCAAAGTCAAAGGGTTGACGACTA…
>GbNAC052
TGATGTCACATAGCAATTAATTAATTTTTAAAATTAAAAAATATTTTAAAATATTAAAATTATAAAAAATATTTTTAAATTTTAAAAACTTAATTAAATTGCTTACGTGGCATACACGTGGACTGCTATATCAGCAAAGTTAATAGATATTAACTTTTTCATCTCTTTTGAGATGATTTGACGAGCAACGAAAATTCAAAAGATAAAAAGAATAAATAGACGTTAAAATGACTTTTTTTATAATATTGAAAGATTAAATAAATTACTATGCTTTTTAATAATAACAAAAAAAAAGAAATTTCGTTAATAAAAAAATAATTAATTTCCTTTTTTCCATAAAAATTAGTTTCCTATTTATTTCCACAAAACTTTATTTTTTCATTTGAAATTCCCATTAAA…
>GbNAC053
TCTCTTTTTAGCAGCCAAGCGAGATCTCAGCTACAGTCATTGACTTAAAGTAAAGACCATTGTTAAACCCAAAAGTCACTCAAATTAACTTGCATGAATGGATATCACATAATTTCTTTCGAGCTTCTTCTCATGGCGATATGTAATATATAGTGTGTATATATCCAAGTTCCAACCTAACACATAGTAGCCCATTATATCCCACCACCATTTATAGCTTTAACTATAACTAAATTGTTTATGGAGAAGGAATACAAGAAAGAAACTAATTGGACAAGGAAACCCCGACCTCTTGTTTGTTTGCAGAGGAAACCAATAAAAGATTTTAGATGGTTGAAGAAGTTGTAATTAGTGTAGAACTAAACATGGGTTAGAGCTAGATTGATTGTGCATCCGTAA…
>GbNAC054
AAAAATTAAAACTAAACTTAAGTATTAAATTGAGTAAATTAAAATTTCAAATTAGAAATTAAATTTTAAAAATGAAAAACACGTGGGACTTAAAAAATAAAAGTAAACTAAATCGAGTTAAAATTTAAAAAATCATGTAATACATTAAAATGGAATTGTAAAGAAATATAATTAATTGTGAAATTAAATAGTAATATCTAAGCCGATTGAGTTTTAGCTTGATTGGCATAAATATTATTACCAATGTAAGATCATATGAAAAGCCATGTACTATATAACAGATACGAAGGATACTGTAGTCATAAAAAAAAATCATAATATTAGGGTGTTAATATGTCAATCATCAAGCGCACCACTTGTCGAAAAATTAAAGCCTTAACATAAAAAAATCCCTAAAGA…
>GbNAC055
ATCTTCGAAAAATACATATCTTGCGTCCATTTTGTTGCTATTTTCAACCCCATTCTTGGCATCAAGGTTGTCAGCCTGTAGAATATAACTGAGAAAGTAGATGAAATTGGAAGATGTTGTGTTCGCCTTAACACAGAGTTAACTGCCTCTTCCAGGTTGGTGGTCATTTGAAAATATCAAACCCCGTCATCAAAACTTTGAGCCCATTTCCACGGCTCCATTGATCCCAACCGCACTCGAAAAAGAATTTTCGTTTCACCTTGTATGTCACCCTCAAGTCTAGTCATCCTTTGCATGAAAAGGTGTGGTTCTAATTCGTACACTATGTAAATATTAAGAAAAGACAAGTTACGGTCTCAAATTAATTTTTTGAAGTATCAAGAACATTTAAAAGATATG…
>GbNAC056
ATGTTCCGATAGTTATTATGGAAAAGCTACTTGATATGCAAAAGTTACTTCACTTGTTTATTAATTAAGAATTGTTACTATTTATGATGATGAGTTATATATTTTATTACTAAAAGTTATGTTATTTGATTATTAACAAAAAATTAAGCTTATTCAAGTAATATGTAATGAATAATTTTATTCATTTTTAATAGATGTGACTATTCAAATAGAATATACTGAATAGTTATGTCTCTTATTAAGAATATAAAAGTGAAATTTTATTTGTTGCTCAAAAAATAATTTATGAAAAGTATTTTGTTACATAGCGAAATCTTTTTCGCTATTCTTTAACTCTCAGTATTAAGAGAGTGAACTTTTATCAAGAATTAAACACATAATAAAAATTATAACTATCCA…
>GbNAC057
AATAGCTATGACAATGACTTTTCTTTTTCTTCCTATAGTAAATATTATGAATTTCTGCTATCTAATAATTGTATCAGACTAAGTTCAATTAATTTAAATAATTTATTCATCTCTAATAAAATAAGAATTCAATGATGCTTGATTCAGCATTTTTATTTTCCAACTTGTCCCAATTCCATTCGGTGCTGTGGTGAACTAATGTCCATGCATTGAAATTTAAATTCCTTTCTTAATTCAGACCCACCCGCTGTTGGTGTCTATTTTGGACCAAACTCCAAATCATTTTTATAATTTCTATTTTACCTATAAATTATAGATTTAACCTCTATATTTTAATTTAGTCATTTTTAATTGTTCTACTTTTTTAATTAATTAATTATAGTCTTTGTATTTTTGTAT…
>GbNAC058
AAAAAAACTAAATTGTAGAAGAGAGCTTTCGATTGATGAATATGGTGCAAATAGAGAAAGTCATACAACAATGATTTAACAGCCTAGTGATTTAAATGAAAACTTTCGAATAGTTTAATCACTATATTGTAACTTTTTAAAGTCGGGTAACCAAAACGTAAACATACTAATAATTTAATGACCTCGGATGTAATTTACCGAACTATCAAAATTCAAAGAGCAAATTAAAAAAAAATCAAATTCAGGGACTAAATATTATTTTATCTAATAATATAAGAGTCTAACGTAAAACTCATAAAAAATCAATTGGATCAAAGCGAATAAGAATATAATAATACTTCGTTGATTAGGTACTGACGTTCACAAAATTTCATCACAAAGAAAACATGAAGCAACTGG…
>GbNAC059
AACGTTTTTCTCAAATTAACTCAAATAAATAAATTTTTACTCGATTCAATCGAACACTCACCCATTTACAAAATAATTAACTTAACATCGTATTCGGAACCAGAATTTAATGAAATTGTTAATGTGACAGGGACTGTAACTGGAATTTCCGCAGCTGGAGCTATAGGGATTGGGATTGGTATATGGGTGTTGAAAAAAGTGAGAGCCAAAGCACCTGTAACATGTGGGGTTCAAAGCAATGAGAATAGGGTTTTCTGAAGAAAGTTAAAGTAAACTGCAAATTTCTGTCTTTTTTCTTCTTTTTCTGAAATCATATTTCGAGCTGTAAAGTGAAACCTCGTTAATGGTTTTTGTTTATGTCTTTTTTTTGCTTTTTGTGATGGAAATTTGAGCTAACTG…
>GbNAC060
TGGATAATTAAAACTTGCACTAATCCCATGATCATCATACTTATATTCAGCAAAAATTTATCACTTGTAATATATATTTCTTTTTCTACGACGCATTAATACGCTCTTCTAGACTATTTTCCCGACTGTAGATCTCGAAAGCATGCATTTTCCATTAAGTTTCTTTATCACAAAATAGGATCTCTCGCCACAATGAACACTTGTTCAGCCATTTCATGAGTTTACAATGGAGATGACATAATGGTTTTATCACGTGCTTTTAATTTCACTGCATGCCGGCCTGTGTTCGTGCACCTTATTGCTGTAATAACAAGATAAGAATGAAATTCTATGTCAGGTGCTTTTATCTTCTTCTTCTCTTTATTTTTTCCATTAACAGCAGAAAAAAGGGGTAAAAAA…
>GbNAC061
TGAGGTAATCATTCATAATCTACCACAATTTTGTGGTACCTTATAATCTTGTTAGTATCTAGTTATTGTATCTAGAAAACATGCAATTTTTAAGTTTGCAACAGTTTATGCTATGTTGTAAGTGGTCACTGTAGTCTAGCACTTTCATTATAATTTTATATTTCAGCAAACAAGCAACTTAAAATATCAACAGAAACAAGAAGAAATCTAAATCAAAAGTTAATAAGAAAAATAATATGGATTAAGAGATTGCGAAAAATATTCAAATGAAAATTGAACACAAATATGTCTAGTGAAAGGCAAATTAAAAACAAATTTGGGGATATCATAGCTCCCCTAAGAGGATGATCAAAGCCTTACCATTTTGTTTTGAAACGCAGATTTGCATAATTCTATATA…
>GbNAC062
TTAAACTTACTATCACCTCAAACAATAAAGTGTTATGTTAAAGAATAGAAAATTTCATGTGGAAATCTTTTTATCATCAAGTTGAAATTAACAATAATCAGTGTTATTTATTTAATCTTCGAATTAAAACAACGGTTTCATCTTAAAATTATATTTCCCAGGTCTGACAAAAAAAAGGCTGGAGGACTGAATTGAATAATAAAAAAAGTGAGCTGCCTAATTCCCTGATTATCCCAGCACAAAGTAAAGCACTGCAGGTTAAGACAAGTTGACTTTGTCGTCGTATCCAAACTACAATAATTACCGAATAGATGCGTAACAAATCAGACGGATACTACAGATTTATTGCCTCTAAGGGAAAATACCACGGATGAACGTACACTTACGTAAAGTGACATC…
>GbNAC063
ACACGCCATCTTTTCCACTGCTTCGGACCAAAAACCAAATTGTCTACAAGTTAATACAGAAAGTGATGATAGGTTTTACGTTACAAACATAAATTCAAGACTTAGGTAACATATATTTATTTCAGTACCCACTTATCTATATATTGAAAGGAAAAAAAACAACTGACTTAATCATAACCACATCATTTTTTTCGTTAACAGTTATATATATATATAACAAATGATTATAATATAATTAGAGATGTAAATGAATGAAGTTTAAATAAATAAATTTTTAGTCATGTTTGTTTATTTATTTTTAAGTTTGTTTATGTTCACTTTGTGTTTGTTAAGAATTTCAATTTTTTTTTGTTTATGTTCGCTTATTTAAAATTATGTGTGTTTATATTCGTTTGTTTA…
>GbNAC064
AAAAAAGAATTCAAGTAATTTTTTAACTCAATTCAACTTATTTACATCCGCCTGCATATCAACAAATTCAACCATTTTTTCAAACCCATAACAGGACTGATTCTAAATCTAGTGAATCTAATTCTGTAAACAGTCGTCTTGCTAATTTTTTTTTTTAAGTTTGTGTTTATGTTTTATACTAATTTATTTAATATTGTATTAATTTTAAAATATTGATCGCTTATTTAAAAGAGTTATATATATATATCATTTCATGTTATTTTTATCTTATATCGTAATCCTTTTTATGTTGAATTAATATCATATTTTGCATATATAAATTGTCACCGTGTAATTATTTATAAAAAAAATTATGAATTTGTATTGTGTTTATAGTGTGTCTTAATTTATAATTTTTCA…
>GbNAC065
TATGTTTATAGATTAAATCTGACCGATTTGGAGATTTAAGTCCGACTTATATAGGCCTTATCTAACTACCAGTTTTCTTTCCATCCAATAATTAATCTGCAAAAATTCTCCCATTTTCTTTTCCTTTTCTTTTTATTCGGTGTCCAGTGGACCAAAGAATAGCACACATATATACAGGATGTGCTGAGCAATTATATATATATACAGGAGTATATTACAACTTTTTTTTTTAAATATGAGCATATAATAAAATTATATATATAACCAGGGATGTTATTGAGAGGAAGACAAGATTTGAACTCTCAAATTTTTAAGATATTTTTTTAATCAATCAAAATTTGAGAAAGGATGGGTCTAAGTAAGGCTAGGTAAACTTAATGAACGAATTTAGAGTGTGGC…
>GbNAC066
CATCTTACATATGCCATGTTTGGGAAGACAAAGAAGTTGCAAAGTGTAGAATATCATGATACTAATGTTGTTCTTATCTTTTAGATCCACCCACTTTGAGCTCTGAACTGGCTTTGCTGGCTAAATGCACCTGGATTTTATGGATTTTAAGATATATTGACATCAATTTTCATTTATTATTTTGCTTTTATTTAGATGAATTGCTCTGCACATTTTATGCTGGGAATGAAACTTCCCTTTCCAGGATATCTACTTGAAATATAGTAGCAGTTTTTGCAAGATTTAGGGCTAGTTTAGCAATACTTTTGAAAAGTATTGTGTAAAAATGATTTTGAAAAGATTAGTTTAAAATTTGAGTGTTTAGTATTGCTGTTAAAAAATATTTTTGAGAAATAAAAT…
>GbNAC067
TAAATGAATAAACAAAAAAATTATATAAAAATAAATAAGAACAAAAGTATAATTTCTTTTTATTTGAATTTTTTTTTTAGTAAATTTATGTCAACAAAGTTAGAGTAAGTGAGAATTCTTGATAGTTTACGAAGGGTGCATGATAAATTATTGAAAATTTTCATTTCATTGAAAATGGAAAATTTTAATATTTAATATTTTAAATGTATTTGATAATCATTTTAATATTTTATTTAATATAAAATTTTCAGCAAAAAAAATATTGAATAAGATAAGCAGGCAGATTGCTACTTATCACTTTACGTAGAAAACATTAAGTCATTTTATTTTATTAAAAAATTGAAATAAATTATCTTTTATAAAAAAATGAGATATTCAAATTACCATATTCATCTTTCA…
>GbNAC068
TATCAGCATATAAATTAGTTCAAGTTCAGTCCAGTTCAAAATATGAGCTTAAAATTTTGTCTAAATTCATTCATATTTACAAAAAAACTAACCTAAACTCATTTTAATCTCACTCATATTTTTATTTTTTATTTTAAAAAGTATTTATATTATATTATTTTAATATTTACATTAGAATAATATTATATATTTAGTATAGATTTATTTTTTAATATATTATAAATTACATAACACATAAAAATAACATAATATAAAAAATTATAAATTTAAAAATAGGATGGCCAGGCTAGGCTTAAGCATTGAATGTTTAAGCCTAAGCCCAACCCATATTTTAAACAGAACTAATTCTTGTATCTAATCTCATTTTTTAAGTCTAATTATTTTATCTAAATCTTCTCA…
>GbNAC069
TATTTTTATTTTATTCTATTTAATTTAATATTATATTATTTTTATCAAAAAATCTAATTATATTCCACATTTTATTTTAAGTAATACATCAAATAAATTTTGTAACTTACAATTTTAATAAAATATTTAAAATATACTTACAGTTTTAATTACTAACGAGTGTTTAATTAAAGCAAATATTTAAAACCATCTTATTAATAAATATTGAAATTCACAATGATGATGCTATGAAATTATTTTGTAGAATACACTTACAAAAATCTTCTTACAACTCGTTATTGAAATTCAAATAAAAACTTATATTCTTGAACTTAAAAATTAAGAAACTTTATTTTCCAACATATGGCAATTTCCATGAAACTGAGAGCCCATATATATATATATAATTGCATTGAAGAA…
>GbNAC070
TGAATTAACACTTTCTGCCCTGCCGGTAATAGTACATTGCCTTTCACCAGAAAAGGAGCTAAGGTTTAAAGCTTCAACTCCATTTATATTCGGCGAACCTTTCACCAGATCCTTCCATCTTCCATAACTCATCAGAAACCTGGCTCAATAACTCTAGGTTACAGTATCGTGTGAATTGTTACCGACTACCAAATCTTCTCTTTGTATCAACAAACCCCATTAACTCTAAGGATAAACTTCCAAAATGCTTCTTTACCTTAGATGCTTTAGTAGTATTTTATCATAGATGATGGTAATTTTTTTTCTCTAAATTGGTATTTTAGAATCATAACATATATAAAATCCAATTATGAAACATTTAACCATTATTGAACAATAAAGTTGCAATCATTCCATTTT…
>GbNAC071
CTTGTGAACCTTGTTCCTTTAACAGGTATATTAATACAAAAATGATAAAAAAATGCCTCTTTTTCTTTTTGCTGATACTCAATACAACCGTCTCACCCAAATATAGCTGCCTTAATTATTTAGGTATACTATATGACCCAAAAGTCCTGGAAATCTTTATAATTCCTTCTCACTGTTGAGTGAATGATTATATAGAGAGAGAGAGGGGGGGATTACATGGCATCACTGCATTTAATTTTTTTTTTGATGTAATTAAGAATTTCACCCTTCTAGAAATTTTAATTTTCTACCCTATAAAAACTTAAAGATTATTAACCTAAAAATTAGCAATTCATTGTTAAAAGAGAAATGAAAATCACTTTTTTTATTTGTGTTGTCCTACTGTCGTTACTTGTCTTG…
>GbNAC072
TTCATACAATATAATTGACTGATAATAAAAAAGAATTCAAGACGATACCGTCAATGTATCAAGCAACACCCAATATTATACAAACCAGGCTTTTTTACTTAAATAATACAAAAAATAAAATTAATAACTGAAATGGTATGCCTATTAGATTATTTACCAAAATGGTATGATTTTATTGGTACCGTTTGTCAAATTGGCAACATAGACTGAAATGTAATGATCTAAAGTATTCAACGACTTGATATGCAAATTTTTCATTTTGAGTGGCTACTAAAAAAAGTGAAAGGGTGCCGCTTAACAGTGTGGTGGCAACAAACCTTAAATGTGGCTAATTACCTTGTAAGCCCTCCTTATTTATTATTTTATTTTTATTCCCCTTCAACTCACTATATTGTGTTT…
>GbNAC073
ATTTTATAACCTCCTTACTTAATATAAATAATTAGTATTGTTAACTATTTGCTTAAAAATATTAATATAGCTTTTTTCTCAAAACACTTCTTTCAACAAAGAAAATAGGTAAATTACCTACTTGATCATCTAATTTTTAAGGTGTTTTTATTTTAGTCACTCAAAATGAAATCTTTACAATTTTGTCACCCAACTTTTAGGGTGATTTTATTTTAGTCACCCAAATATTAAATCTTTAACTACGGTTAACTATACATCCCACATCATGTTTACATTTTTATCTTGGTCACCCAAAGATTATCTTTTTTTAAGTATTGATTGAGGGTAAAAAAAATGAAAGATTAAAGTGAAAAAGCAGTAAAACTTAAACTAACACGTAAAATTAGTCAAATTGTATTT…
>GbNAC074
TCAACACTTCTAAACATAAAAGGTTGTTGTTAAAAAAAAAACAATTAAAGCCGTCCTTGCACCATATTAAGCATGTAATTGATCCAATATATTCTAGAAGGCTAATATTTCTTAGTCTAATATATATCCTGCGGTGTATGGGAGAATACAAGAGTATAACAAGCCTAATAATAATAGTAGTAGTAGTAATAAGTGCAAAGAAATAAGTAAAAGAATAAGTGATGAGTGATGAGCACCACCAAAAATATCATCCATCAAAAATTTTTTTTTTGTAGCTTTTATTTATGAATAAGAAAATGCAATATTTTTTAGGAAAGAAAATATATTTTGCTTTAAAATTATGGGAGTTACAAAAAGGAAGGGAGAGAGTAGTGATCATGTCTGTAATTAAAAGAGAAA…
>GbNAC075
GTATAATTTTTAATGAGGTAACATATCATTAACACGTCACGTCAATTATTTATGCCTTACATATATATATATGAAAATTGATAATAATCATTGCCAACCATTATAAAAAAATGTCAGCCGTGACACTTGGATCTTATTGGCATATATTTTATAATTATTTTTTCATTCATTATTATCTATACCATATATTAAAAAAATTCCTGATAGGTCGGTCAATCCTTAATCAATGGCGGGCTACAAAATTTTAATGCTATTTTAATTTATTTTATATTTAGTTTTGATTTTTTAAAATTCGTATTCTTTTAGTTTATATGGAATATTGAATATTCCATTTCTAATTTGTATTTACTTTGGTATCATCTTAATAATAATAATAATAACTAATTAATTAATTAAAGT…
>GbNAC076
GTCTAGAATCTTCCATTCCTTGCTTATCGTTGAATTGACTCAAAAGTAATACTTATTCACAAAGTTATATTTTGTTATGATTTTATATAATATTTGATAGAATATATTTTGTTATGAATTTTTTAAAAATAAATTAATTAAATTGATGACAAGAAAATTCAACAAAATAAACGAATTACAGAATTTAGTTAATGAAAAGTAATTTGAACAAAATCCAGAACCAATTCTGCAATTTTTATTATATTAATAATTCAAAATTTTTCATCAATCAGCAACGAATTATATATGAACTGTCAAGTAAATTGTCAGGTCAGTTCCATAAAAAATTTAACGATTTAATTATTTAAAAAAATTAACTATTTTTATCATAATATAACTAAAAATTGAATATCGATAGTC…
>GbNAC077
GGTGATCTTGATTCAGCTGTGGCCGATCGCATTGATGAAGTACTGGAATTCCCTTTGCCCGGGGAAGATGAACGCTTCAAACTCCTAAAGCTCTATCTAGACAAGTACATAGCTCAGGCTGGTTCAAGAAAACCCGGTTTGCTTCAAAATCTTTTCAAAAAGCAGCAGCAAAAGATTGAGATCAAAGGACTGACCGACGATATCTTAAGAGAAGCTGCAGCAAAGACTGAAGGATTTTCCGGAAGGGAAATAGCCAAACTGATGGCGAGCGTTCAAGCAGCTGTTTATGGGAGTGAGAGCTGTGTGCTTGACCCGAACCTATTCCGGGAAGTGGTAGATTATAAGGTTGCAGAACATCAACAAAGAAGAAAACTGGCTGGCGCAGATGGAGATCGCGCA…
>GbNAC078
TTTATTCTAATTTGAATTTAAATATATTTCGATTTTTAAACCCTTATAATTGTAATTGTAAACAGTATGTATATCTATACATATATGTATATATTATGGCCGTCCAAGTCGAATAAGATGCGAAAATCCCAAGAAGTAATAGCAGCTGTTTTTCTCCAAGCCTTGCTTTAGGAACAATCAAAATGGAACTCTCTTTATTTTCTCGGGATTGTTTGCTGTCATTTTTATTTATGATTTTTGAATGAATTAATTTGCTTCTTTGAACGTAGCCCTTGTCCCAAGTTTCTCTGCAGCGCGTGCAAACTTTTAATATTCAACATAACAACCTAAAATAAACCATCTCTTACCGATCGAGTCTTATCTCGATTGTTATAAGTATTATTGTTAATGTAGGAGGAC…
>GbNAC079
TAACTCCTACAAGTCAATCATGATTAGCTTGTAATCTCTATTTAGAATTTTGAGTTAACATTTTTTTTTGTAAAGTATAAATTTGAGACATTTATTTATCCATGAGTAAATTGTTAAAGTTAGTGATGTTTGGAACTTGTTTAGATAAAATCCTAGAACACATATGATATTAATAAGGAGTTACAATTATGAGATTTTTATGCATCAAAGTTGTGATTCTTAAAATGTTCTTGATCATCGTATTATCAAGATAAGACATCGGTAATGCTCAGAGGTCGACATTTGTTAACCCTCCATACATGGGGATGTATACAACTGATCTTATAAGTTGAAATATGGGATACTTAAGCATAACATGTTGGTCTTTGTTACGAGAATAAGCACGCTAAACATGACCTG…
>GbNAC080
AGGTATAGGTGAACTGTACGTGTTATGTGAAATAAATAAATAAATAAAATAATTAATATAATTTTATCAATAAAGAGAGAATTATTAATTAATTAATATAAGTTTAATAGTAATCAATTGGCAGTTGTGCTGATTTTACTCATTTTTATGAGGCGATTTTGAGGAATAAGGTCCCCCGTTCAACGACATATGCCCCAACCCTCTATTCCATACTTCATACTTGAACTAATATACATGATTTTGGTTTAATTTGGGTTTCAGTCCCTGTATTTTTTAATATATATTTTAGACCTTTTATAGTGGAAGTCACTCTAAGGGCTTCAGTTAAATTGGATTATGTACAAAGGCTAAATAAGCAAAAAAGAATTGTTGAATATTTCTCATTTGGAGATTGAAATG…
>GbNAC081
AAAAAAAAAAGAGTTGCGTACTTATAAATAAGTACTAATGACTTTTTTTAAGTTCAAACTTTAAACTCTAAACTCAATATAAATCCTAAATGCTAATTCCTAAATCCAATACTCGAGAAAAATATAATAATTATACTTAATTATATTTAAATAAAATTATTAGTATTTATTTATAAGCTTTTCATTATACTTTATTTCACTAGAGATGAGATGTCGTGTTATTGTTCACTGATGAGATATAAGACTCATACACCAAGACTATATCAAATATTCACCCTTTCTTAAAAACATTAGTGTTTTGACCGGAATAGGTGTTAACAATTTAAATTAACTAACGAGATTGTAAAAATAGAGGGATGAAATTATACCAACTTAAAACATAAAAGCTGAATGTTACGT…
>GbNAC082
CTTGAGAAAAATCTAATCATTATACTCAATATTTAATTATGTGTAAGTAAAGTTATTGATATTTTACCATTGGTAAGGTGTTGTGTTATTGTTCATCGACAATATATGAGACTCATACAGGCACTATATCAAATATTCACCCTTTCTAAAAATTGTAACGTTTTAATCAATGTAAATGGTTTAAATTAAGTAATAAAATTATAAAAATAAAATTATGCCAACTTAAAATATAAAAGTTGAATGTAAAGTAGAGGGACCGGAATCATAATTTGATAAAATATAAAACATATTCTTTTCTAGAAGTCACAAAGTGACACCAAACAACTGATGGAACCAGTTTGGACACTTCCCGTGGGCCATAACATCATCAATACAAATAAGAAAAAGAAAAGACTGTTT…
>GbNAC083
TCCTTAAATTTTAAAATATTCTAAATAAATTTTTAAAATATTAATATGGTATCAATTATATTTTTCTAACAAATTAGTATATGTGAATCTAGTGTTGAACATATTTAAGATATGTGAATTAAATTTAAAATTTATATTCATTTTATCATATGAACAACTTGATTACTACGGGAAAAATATGTATATAGCGACGTTTTAAGCGAAATGCCACCAGTTTTTAGAATTAGCAACGTTTGTCAAGAAAATGGCAGTACATGTCACTTTCAATGGCCAGAAGCCGGTAAATGCTAATATTTATTGAGGCTTTGGGAAAAACGCCACCAAGTATATGCGACTTAGTTGTGCTTGACAATACAAACGCTGCTAATGGTGAGTAAAATTCCGACAGAGAACCGCTGC…
>GbNAC084
AATGGTGATTATCACATGAAAATTATGAAAAATGTGAAAGTAACCTAAAAACAGATTCAAGTAACTGAAATGACGTAACTTTGAAAAATCACTAAAAATTGTAGAAACATAGTTTGAAGATGAATAATATATTAAATTAAATCTTATTATGTCTATTTTCTTATGGAATAAGAAAAACAGGTAAAGGTATTATATTATATGATATATCTGAGTTTTAGTGAAACAGGGTCAGAGCGATTTCTGGATCCCCTGTTTCAACTTTGGAAATTCACCATAAATTGTACAAAACTAATTAGAAGGTTTACTTTATATGGTTATAATCCTTGTTGAGTCTAGTTTTAAGAGAAACAAACGGCTTAGTGATATGAATTTTGTACAGGAAGAAACATGGTTCGTAGC…
>GbNAC085
TAGCTTTGATCAAACAAAACAGCCACAACTAAATGTAGAAATGCTTAGATAATCTAAAAAAGATTATTATTGTGTTTTGTGATTAATATGTTTTTTTAACATTAATATTATTATAGGTTTTTATTATATCTATTTTTTATACAATATCTAAAACTACTTATAGTCCCTTCTTAATCCTTAAATAGGAGGATTATGCGTTTCAGCATATTTGAACTCATGTCCTTCTAGACTGACAACAATGTTGCTGTCAGGCCCATTCTTGACATTTAGAGGCTTTAGGCGAAATAATAAATTGAGTTTCTTTTAAAATAAATTATAAAATGTAATAAAATAAAAGTTGAAAAAATTTTGAGACCATAAGAGATGAAGTATTTATGGTGAAAAATTGAAAACTTTAAA…
>GbNAC086
AATTAAGATAAATACAGATATCCAACTCGTGATTCCTGTAAAAGGGAGGCTAACATTGATTTTTTGAACAGATTGGGCTTGATTTGTAGCATTATGTATTCAACTGCAGGCCTGTTATATCATGGTCCCCCAAGTCTCTCAACACCCCATCTTTCTTACATTTTATTGGCATTCGGTTTAACGCAAAACCCAAAAAAAAAAAACAGTGAAAATCGCCGTTGCCGGGGATCGAACCCGGGTCACCCGCGTGACAGGCGGGAATACTCACCACTATACTACAACGACTCGATGCTCATTGATCAAGTTTTATTATATTTCAAATATTTATCAGATAAAATGTCTTTTTCAAAAAATTATATGTTATAATATACATTTATTCCCTAATTATGTGAGGTTGAG…
>GbNAC087
AAAATGGTTCAACCTTAGGTACAGTCGTGTGGGTTGGTGACCCTTTTAACCACTCTTAATTATCTTTTTCCCTGCATTTGTCTATTCACCCCATTAAATTAAATTAAATTAAATTTTATGTGCAGCCATGGTAGTGTCCATTGTCAAATATTCTATGTCATCCCCCCCTATTCTTACCAAAAAAATAACTTCTTTTTCTCACTATAAATGAACAGCTCATTCATATACATAATTAAATGTGTATTTGATTATTAATAATGACTTTTCATTATCAAGGTATTTAATATTGATATTGATGGATAAGTCTACGTTTACAACTTTTAGAAACTATGTAGATAGTAGACAATATCACCCTTTCTATTCACACACACATACTATAGCAATTCCCAACAAAATTAG…
>GbNAC088
TTTAAAATATATATATATTAATAAAATATTTCAAATATATATTTCAAATTTTTTTAAGTTAATAATAATAAATAAATAAATAAAGATAAAAGACAAAACATAAAAAAAATAAAACTCAAAAAAGTAAAAAAGTAAAAAAAGTAAAAAAAAAAGAAACTTACATGGCAGGGGAATCTGGTGGCGCCATATTAATTGGCTCCACCAGAAAATGATTAATTTTTTTAAAGTCCCCATATTTTTAAAAATTTTAGTATTTCTTTAATATTTATACAGGTGATGCTATTTTACGTGGCTCTATAAAAAAATTAATTTTTTATGCTCCCTGATGATATGATAAGTTGGTGACGCCATATAATTTGACTCCACTATTTTTTACTGTAGATTTAGGATCATTTTGAT…
>GbNAC089
ATGAAAGCTTTTTACATACGTTTTGATCTATTTAAGGGATTTCACTAAAAATATATACATTAATATAAAGAGGGATCGTATTTTTAACTCTTTTCAAATTTTTCAATTTTCAACACTAAAGACATCAAGTAATCAATTAAGTACCAATTTTAGGCGCAACGAGGGTCTAACCCTTCCTCGTGCGTAACCGACTCCCAAACCTATTTTCTAAACTTTGTAGACCAAAAATCGTTGTTTTAAATCAAACATTTTATTAAAACAATCAAATTACGAAGTGATCTGATCACACCTCATAAAAAAAAGATTGGTGGCGACTCTAATTTTATTTTTTAAAATAAAAAGTCAATTTCAAAAAAAAATGGTTTCGACGTCCTCCTTCATATTTATTCTAATAACCAT…
>GbNAC090
TCTTCGGCAAAAATTCTTCAAGAGCAACAGGAAAAATTCATTTCATGATAATCCTATTTTTATATCTTCTTTCCTCTTGCCCTTCAGTTTTAGGTTGAATTTTGTTGTGCATTGTTTTCTCTCAGTTGGACAATTGATCATTAGTATGTGCAATGCAAGATGATTAAATGATTTATTATTGATTTGCTTTAAGACATCTAGGGTTCTTTGAACAACCTCATGTCTCAGGCCAGGTAAATCACATATAAAATGCAACCAACTCCTCTCCACCGTTATAAGAAGTAGCAGAGGTGTCATAGAAAACGGCTGAAGCTTTGAACCACGGTAGCTCCAATGTTAAGGTTGGAGGTGTCGCCACCCTGGAAAACCTCAGCAAAGAGCGGTCCGTCAGGTTGTGGG…
>GbNAC091
TTGCCAACAACCTATGTATCCTCTGCTTCTTTGCATAAGGCCTTGTATCGATTTTGGAACTCGCCACCTAACAAGGATTCTGATACAATTTCAGGAGGAGCTTCGGATTGCTTAACAAGTTGCAAATATGGGAGACGTTATGTTAGTAAACTTCTGGGAAGATACAAGAGTTGACTCCAACCATCTAACTAAATCATTATTAACCTAGCAGTTTGCTTGTATTTTAAATGGTTTTTATAAAACAAAATAATCTAAAAATTCTCATAATAAATTGTCCTATTACGTGTTATATAAACTCAAAAACATGTTTCTAAACCTTTTTAAAACTTTCCAGGCCTAAGTCTTGTAAGCATTGATACCCTTCAAGATCTAACACAACTTTTTAAAGGGGGTAGGGTA…
>GbNAC092
GAACCCCACCATCAAAAGTGAGGATAATTGATCTTGTTTCTCTTGCTTGATGATTACATGTTGCAGAATCATCACACTTTCAGCTAACTGTTTGTTCACAAACATTGCATTCATTACATACAATATCAACTCTCAAATAATTATAATCACCATGGTCAATTAACACATTCATTCAATAATGTCTTTTAGTTCAGCCTGGTATCATCAATCACCATCAAAGATATCAACTCCGAAATAGTTAGAATAAACAATATTTGTACTATAAGTACTTCATTCAAAGGAATGAAATTCTCTATTCTTCCTTCTTTCTTTATTTATATATTTCTTGCCCCTTGTATAACATATTCACAGTTTATTTTCTTTTCTATTCTTCTCTTTTCTTTCATATTAGCCTTACGT…
>GbNAC093
TTTAACTTCAACTTTTTTCGCTAAAGCTCCATAAACTCTAGACTAAAATTAATGGAGGAATTGAAATCAATTTCAGCCTAAAATTTATAGAGCTTTATTAACGTTGAATTTTTTGAACTTCTTATATTTTTAAAATGATTTTTTGAATTCTTAAAATATATATTTTTTTAAAATTTTTATTGAAAATATTAGAAAACTTTAACTTTTAAAAAATTATTTTTTTTAAATTTTATGTAATTTTAAATAATATGAGCTAAATTGACAAAATTTGTAAATTTTTAAGACTAAAAAAGTTTTGCTACATTTTTTAGCAATTGCCACATCAAAAATAGTAAAGACAAAATTTGATGTCATTATCGATTTGATCAAAGTTTTAGGATGTTCTTGTCACCCTTTATT…
>GbNAC094
ATATATTTATTTTGTGTAAATAATTTTATGATATGGCCATGATTGGTTGAGAAAATGTTTGATATTGATAAGTCATGGTGATGGTTAAATTTAGATCATGTTTGATATCATGGAAGTTTAATAGGTTATCTAGTTCATAACAACTCATGAAAAGATGAAATTTGCCTTAAAACAGAATATTGCTGCAACAATGACATGAATTTGAAAAATCACTAAAAATAGTATAAATGGAATTAAATAATGAATAAGTTATGGAATCGAAGATTGATGAGTCTATTTTCAAATGGAAGAAGCGAAACAGGTATATGAGCTATATTTTATGAGATGTTTAAATTTTTATGAAACAGGGCCAGAGCAATTTCTGGATCCCCTATTCTGACTTTGGAAATTCACCATAAA…
>GbNAC095
TATTAATTTTGTTTCGAGCTTATTTAATGATTTTTTTAAAAAGGAAAAAAATCAGATGTAAAAGATGAAGTGAGACTGTTATTGTAAATACTTTTACTTTGATCAACTTAAATTTTTAAACCTATGAGTATTACTTTTCATATATGTTTTATTATATAAATCAATAATAAATTAATTTAATTAATGATATTTAGTCGTTCTTTATTTAGTAAAGAGAAAGAAAATAGAGTTTTTATTCATATTTCTAATTTTATGCTTAAATTTATACAAAATACTTTCTTTTAGGCCTAACTATTGTAATACATATGCAATAAATAAGCCTTTTTCCTCATATTGTTATACTAATAACTGTTGAAACATTTTTAAAAATATTTATAATGTTCCAATAGTTATAACTGA…
>GbNAC096
AACATGGTTTGACTTGAACCTATGTCTTATAGCTAGCTCAAATAGTCGCATTCCCCTATCCTATAGAGTATAAGTTAAAGTCTAACAATATACTTTTACACTATATTATCAACTTATCGCTTATCTAGACACTTTAACTTTGGATAAAGTTAAGAGATACAACCACACTAGTAACCCGCTTATATTTTGTAATTATTTTTGTAGGAGCAAAAAATCAGAGATTAGCATAAATACTCGATACATTGCCATTGTTAGTCAATTCATCCAATTAAATATAATTTTCAGTTAAGATGTTACTGTCATTGCTCGCTTCTATGTCCTCAAAAAGAGCCAAACTAAAAGACTATAAGACAACATCAAATATGCAGGCACCAACTGGCCAAAGGATTCGTATATTTG…
>GbNAC097
CAAATGTATCTATAAATAGAAACCTTAACATTTGGAATTTGTATTACTTGAGAAAGGAAACCTCTATGCTTACACAATTTGCACATGATTTCTTTTTTGGATGATGTGTGATAAAGTTGGAAGGTTAGGGAATAAAGCTATGTTAAATTTTGCAGTATTAATTGTTTTCTCTTTTTTCTTTTTTTTAATTTATTTCTTCTTGAGTGCTTGTTGTTTGGTACATTGTTAATAAAAATTTTTAAATTTCACCTGGTTCAAGAAACATATTTAAAAAATTATAAATTAAATCAAAGTTTAAAATTTCCAACAAGTACACATGGTGAAAATACAACTATTAATTAAATTTGGATGTAATTGCTTGAAATTGTCCATTGTTTGGGTAACCGTTGTAATTAATTA…
>GbNAC098
AAAAATTTAAATAAAAAAATTTCCATTAAGTAGAGACACCTACCAGCCGGTGGGTTCGCGCCCGAATACAAAGAATGTGAGGGAACATTAGCTACCAAAAATATTTGTGATTACAACCACCTTATATAGTAAAAAGGAAAAGTAAATGGGAAATTAACTGTAAGGTTTGGTTGGATTATTAGAAAAGAATAATATTAATGATAAAGTAAACAAAAAAAATCTGACACAAATCCATTATAATATATTATAATCCCAATCAGTTTGTCAACTAGAAGAACTTCAAGGCTGGCTATACATCAGAGACAGCCTCTGTGTCTGTCTGTCAAACATGGCCAATCTCATTAATTAATATACATTTTCAAAAATATTGGTCTGTCCTTGAAATTAATATATCAAGAT…
>GbNAC099
GGTCTAATTCAAGCAACATTGTATTTAATAATATAAATATTTTTTTAAAAATAAAATTTTAAAATATAAATCATATAATAGATTCAAATATTTAAATCTAAATATAAAAAATAAAACGGATAATAATTGAAATATTCAAAAATATTTTCGGTAATTAAAACCCATAAAATCTAAGGGTGAGCTTAGATGGGTGGTGGGGTGAGGTGCGATATATTTAGTTTACTTTTTGTCTCATACTATAATATCTAATCTCACCACCACTATTGTTTTTACACTAACTATAGGTAAAGACACATCCATCCAAACCTACCCTAAATTCGAAAAAATAAAATAATAATAATAAATAATAAAAGGCAGCATGTCCCACAAACGTAATACTTGCCTTATCGGAAAAGCATG…
>GbNAC100
AGTGTAAGTGACTCGACCAACACGAATGGTGGCTTTGAACCCCGGAGCATGCGCAAACCCTTAATTCGTTGAAGCTATGGTAAATAGGGAGACCGACCCCGGATCTCTGAGCATATTCTTGCAAACGATATTATGCAAATGATGTGCAAATCCTAAACAACACACAGAACACATCAAATGATATTAACATCCCACATCGGTTACTAGTAATTAAACACGAAACTGTTAACAAACAAATTCTTCTCTTCTATTATCACATTACAAGTGTTAAGAACATTGGTGGGAATTCCCATGCAAGTAGTGGGAGACACCTTCATATCTAAGGGCTGAGAAGATGACACCTATCTATGGGCAAAATTTTCATTTAAATTATTTCTTTGCTAAGAAGCTCATAGATAC…
>GbNAC101
ATTAGTTTATTTTATATTTACATATTGTTTTATTCATTACTAGTCTAATTTTTAAAGTAAACACTTTTTTATGAGTTTTTAGTATTTTTCAATATGTAAGTCAGGTCAAGCTGGATTTGAGTTGGATTTAAGTATGATATTAATATATTTTATGTTTATTCAGGTTCGACTCGACCTTCAATATGAGCTTAAAATTTTGTTTAAATTCGCCTATATTTATAAATAGTTAACCTAAAATCATTTTTTATTTGTTCATATTATTTTTTAAAATTAAAATTATATATTAAAATTTTTTTTATATAATATTTAATGATTTTAGATTTTTATTTATTAAAATTTTATATTTAGTTATCTTAACATTTTTTTTAGTATTTGTACTACAATAGATTAAATTTTTAT…
>GbNAC102
AGATATTATATTATTAATCAATAATGATGCACATATAATATTATTCATACATTATTATCTACATCATCATCTGTTTAGGGTAATTATTTTTCTTGTTTCAACTCACATAATAAGAGAAAATAATAATATATATTGTAAAATTAAATGAATATTTGATAAAGGAATTTAGAGAGATGGTTGGTTACTGTTTAAAATAATTAATACAACGTCTAGACTTATCCATAGCTTCGCTCTAACTCTTATTAGAATTATTCATAACTTTTCTCAAACTCTTAAATAAGAAGATAATATACTTCAACGCACTTAAACTCACGTTCTCCTAAGTTAATAATAATACGAATATTAACTAAATTTAAAATTCAATCGATAAAAAATATATATATCGTGCCCTAAAATGAC…
>GbNAC103
TAGCTAATTGTGAATTTTCATCAAATTAACTTTAAAATTTGAATTGAAACTAAAAGGTTAACACTGTTATCTTCAAATATCAAAATGTATTACTTTTATCAAATACAAGTAATACATTAGACCTAAAAACAACACATGCCATTGTCTTAACTTGAATAGAGTGATGGTTAAAACTTTTGTCAAGCACCTGCTTGACATGGGTTCAAACCATATTATTCCATTCCTACCCCTAATATTGCATCGAAAAAATTTACGTGTTTGACATTAAAAAATAAAAATCAAAGTCAGCTACCATACATTAAGCCCAAATAACGTTATATAATTTATCATAACATATGAAAGTTATTGAAAAGGCAGTAAATGTAAGTATTAATTCAAAATTTCGAAGTCATTATTTAT…
>GbNAC104
AAATAATTCAGGTTCCGATGTTAGAATAATATTTGTCTAGTTCAAGGATTAATTTGGAGAAAAAAATTAATCCCAATGCAAGAACAAGTGTTAAGTTCAAGCCCAAAGAATGTATTAACCCATTTAATAATAAAAAAAGTGTTGAGTATAATGATAAGAAGCATTATACTTTTAAGAAGAAAACTCAGATTCAAATGATATCATTTTGAACCTGAGTTTGACACTCTTTTCTAGTGTGGTACTTGTATTATTTTTTGTTCAAATTGGTACATGTATTCGATAAAAAGTTATATATTTTTGTCCCCAAAAGTGATAATGTTAACTTTTACTGTTTAATTTGGGTTTTAAGATTGATCTCATGAAAGTCAATTGCTAATATTATTATGTTTAAAATTTTTA…
>GbNAC105
TTCTTGATTAAACTTTTTTTAATAAAAAAAATGATCTATACCTAAAAATATACTTATATATTAAAATTAAAAATTTTTTAAATAGTTGCACGTGTCAAAGAAGCATGGACTCAATCTTAAGTTGAGACCCGAAAATTTTTTAACAAGACTCGGCAATTTTTTTTGGAATAAATAAGCCAATGGCAATTTCATTTAATCAATGGGATAAAACATCGTTAAGAACAATATCATCGGTCCTACTAAACTTAAACCTAACATCATTGGTTGTACGTAAGCCTACGCAGATCAAGTTATGCATGTTTGAGATTTTCAAATTTGGGGATATCAAAAGAATTCGGATCCAATTTGATTTAATAGATTTTTTTTAAATCGGATTTTAGAATGGGTCAAGATGTATTT…
>GbNAC106
TGGCGTCGAAACATTCAGTGTACTGTGCTCAGCCTGCATGCCTCCAGCCAACCTGTGTAATGCAGCCAGATTGTATCCAACCAGCATGTTTCGGACCGCGTCTTTTTCCTAGCAAGTCCAAGAAAGAAAAGAAGAGCAAAATAAAGAGTGAAACGAATCAGCAAGTTAGCCCTCTTCCTGAGCTCATTGCAGAACCTACCAATGCTCGATCAATGTCCTTCGTTGGCACTCACGAGTACTTGGCACCTGAAATCATTAAAGGCCAAGGCCATGGAAGTGCTGTCGATTGGTGGACGTTTGGGATCTTTCTATACGAACTTTTGTTTGGAAAAACCCCGTTTAAGGGAGCCGAGAACCAGGCAACTGTGTTTAACGTGATCGGCCAGCCATTGAGATTTC…
>GbNAC107
TTAATGTTTACATTATAATATTATATTTCACCACCAATTTAATTTTTGTATGTGTTTTAAATTGCATAACATATAAAAAATAACATAATATAATATAATATATTAGAAATTTAAAAATAAGTCGAGGTTGGACCTTGAATGTTTGAATCTAAGCCCGATCCATATTTTAAATGGGCTTGTTTTCTTTGCCAAAGCTCATTATTTTAGATTAATATTTTTGCTTAAATCTTCTAAAGTTGACTTAGAGAAACTTACGATGATTTGGGTCCAAATAGATCTATTGTTCTAGATTTATCAAATTACAAAAATACATAAATACCTTCAAAATAATATTCTTTACTTTGTAGAAGGAAGGAGCTTTTGATAATTTTTTAATTGAGTTTAATTCTAGTTGACGAG…
>GbNAC108
GTTACAATATAAATGTAACAAGTGAATAAATTTATAAATAGATTTATAATCTATTTTACTTGGGTCTTTTCTGATATATTGTGAGTCCAGTCAATCACATTTATATTTATCTTTTGGGAGTTATTCGCTCCGATGCTCAAGACAAAACATATGTTTAATTGGACTTGTTAAATGACATGTCAGTCTTTCAATCGGTTTGCTTATTTCCAATTAGATTAAGAACATGTTTAGATTAAATTACTAATATAAGTGTCTTTACGTATTGTGATCTGACCATCGATTAGTATTAATTAAATGTTAGGTAATTAATGAGTCGAGATTTATTTTCATTTTGCTTTGTGTGTAAAAACTATTAAGTACAATATACAATAGTATTAATTAAGAGTGTAATTGTGCATT…
>GbNAC109
TACCACTGAGTATACCATACTCAGCGTACGGTTTGTTTCCGTGCGCAGGTTTAGCAAAGATAGAACGTTGAATCAGCATCCCAGTTCGATCCCGAATTCATTAAGGTAAAGTGTGTTAATTATTGGTAATGGCATGTACCTAGGATGTTTTATAAGAGTCATTTAGGTTGTAGATGTACTCATGAAATGAGTAAATTATGGTTGGCAACGGTATGTAGTATGAATTTTGAAATTTACTAAAAATTCGTAGTGATTCTAAATTAGTCCCGAATTGAATTTACTGTTCATATTGGACCGCGGGGGCCCATTAAAGGGACGACATCTTAAAACTAGGATGTGTGTAAATATTTATTTTAATTAATGACCGAAATTGGACTGTACTGACTGGTAATGTCTTGT…
>GbNAC110
AATATTTTTGAGAAATAAAATGTTGTATTATAAAATAACAAATATGCTTTTAAATAATGTTCAAATTAATTAATATTATGATATTTTAGAAATAATATAAAATATAATTTATTATAACTTGTCATTAATAATTTAATATATGAAATATAAATTTTAAATTTTTAAATATAAATTTTAAATTTTTAAGCAATTAATATTAATTATTTATAAAATTTAATTAAAATATATAAATTATATTTTAAATATTTAAATATAACCATTAAATATTTGTAGTTAGATATTAACACATTTGTATTATTTTAAGAAATACTTTTTTTAATTAATAATTTTATTTTAAAATGTAATTTGAATATATAACCTATTTTAGATATTGATATAATAGAAAACATAAAACTAACA…
>GbNAC111
GAGTAAATTGAAATTTAAACACAAAAACAACCAGATTAAGAACGTTAAATAAATACAATTGTTTATCATTATTTTGTCATCAATTTTGAGTTGGTGTCATGTTCATTTGTGACACTAACTCAATCAGCAACATTATTCATATACACAAATATATAAAAATTTAGAACACATACATACTTATTAAAATTCAAATAAAAACTAAAAATCGCTTTAGTTCAAATCGTAAATAAAAAAATTATAAATGGATGGTGTCTCACGTTCAAATATCATTATGGATAAATTATGTAATTTATTGAATCACGACTCAATTAATAGTTGACACCAACTCAATAAAATATTTATTATTATTATTCACTTAAAATAAAAAAATAAGAAGAAAAGGTATTTATTAATGTTTAG…
>GbNAC112
GGATGCCTGTTTGTGTTAAATTTTCATTTGAATTGCTTAATAGAGTTAGCATAAGTCATCTAATTTGTTAATAATAGAAGTTGATTGTTAAAATAAGTCTAGTATAATACTATTATTTAAAATTTTAATTGAATTATTGTTATGAGTCATTTGATCATTAATTTGATTAAAAAATATTAAATCACTTTTACATATTTGAAAAAAATTATATTTTTACAAGATTTTAAATAAAACTAATAACAAAATACAAAAAAAAAAATGTGATTCGAACCAATAACATCAACATACATAAAATCATAATGTTAATTTAATTCTTTTTTGTGCATTTTTATATTATTATATAAAAGCACCCACACAACATATTTTATTTCGTGTGCATTATTTATCCATACATACTAC…
>GbNAC113
TTATTTAGCTTTAATATAATAGTAAAAATTTTAAGAAAAAAAATTAAAATAATAAAATTATATCTTTATTGTGATTCTCAACAAGTATGGAAAACGAGCTTTCGATAATTTTACAACTAAATTGAGACCCAATAAATGAGTGACGTTAACTCATTCAAATACAGTACAAAATTATGACACACCCACAATGTTATTGAAAAATTTATATAACAATTTAAGGTATAAATAAAAATCAAAATGTAACTTTAGTTGAAATGGTATATTTGAGTTTATAAATACAGTGAAGTCTCAAGTTTAAATCACATCATGCATGTCTATTCTCAAGTTTAAATGCAATGAAGATTATGAGTTTATAAATAATATTGTTACTTTATAAAAATATTTTTTTTGATAATTTCA…
>GbNAC114
AAAAGACCGAATTAACCGAAATATTTCAACTCGGTTAAAATTTTTTTGAAAAATTTCGATTCAGTTAACGGTTAAAGGATTAAAAAATTCTATTGATTCGGTTAATATTATTTCAGTTTGATTAATTGACCGGTTAACTATTTGAACAAGTGAGATGAAATTTGTTTTTGTTTTTTAATATTATTTTGATAATAAGTTTGTAATAGTTAGTAGTGAATTTTCGTTTTCAACAATTTTGGTAATTGACGGTTGAGATAAAGACAAATCTCAAGTGTGTACAAAGGATACAAGTGTGGTTTAAATTAATTTAAGATATATAAAAAAAAATGAAAATAAGAAAGTGAGGGATGGATTTAGAAATCTGTCTATTCTATTGACAAGAAATAATTATACGTCTTT…
>GbNAC115
AAACAATTTAACTTTCATAAATTTGCTCCCATTTAATCGATAGAGCTAAACTCTTTAAGAGATGTAATCAAGTTAAACAATTTGAGTTTCATAGATTTGCTTGCACTTAATCAGTAAAGTTAAATCTCTTAAGGGTTTTAATCAAGTTAAACAATTTGACTTCCACAAATCTGCCCCCACTCATTCCATAAAGCTAAACCTAGTAGGGGATGTCATCAAGTCAAATAATTTAACTTCCACATATTTGCTCCTACTTAATCGATAAAACAAAATACCTCGAGAGATATAACAAACTCAAACAAATTGTTATGCATATTTGCTCCCCTTAATCGGTAGAGCTATATTCTTAAGGGATGCAATCAAGTCAAATTATTTGGCTTACATAAAAAATTTCCTAAT…
>GbNAC116
CACACGCGCGCATACTCAAATGCAGAACCCACCTCTGTGCTACTCCCCCATTCCCTGCAACCCAATTACATCTGTTTTCTTTTACACTTTTCTTTTTATTTCATAATCATTTCTTAATAATTTGTTTTATATGAGGATATTATATTATTTAGTATTTGAGTTTGATTTTGATATTAAATACAATATTTATATTAAATAATATTATGTGACTCAATAACTATTTGACACTGTACTCTAACAAAACACAACATATATATATTTAATTGGGGTAAAAAAAAGTTCGGATACTAAATTGAACAATGAACCTAAATATTTTATACTTAGGATAAAAGAAGCTCAAGTATCACGCTGAAAAATGTTAATATATTATTAGGTACTTGAGTGTTTTTTGCAATGTTC…
>GbNAC117
CATATCTTGAGACATTTTAAAAAAATAACAACAGATGTTTGATGCAATGGTAATTTATATTGGACTCTTAAAAAAGAATACAAACTTAAATCGTAGAAAGATATTACGGAGAAGAGGAATTATAAGTTCTGAACATAAATTATAAAAAGAACATGAAAAATGTAAAAAATAATAAATGGGGCATGTGTTTTCGTTTTTAGGAATTTTTTTTCACAAAATTAAAATATGAACAAAATAAATACAAAAACATTCAACCCCTAGTAACTCTACCTCCTACCTTCTATCCCAATGATCAAAATCTAGTTCAATTCCTACCCTTACCCTATTCCACGATTTGGATGCTCTGCCCACTCTTATATACTACCAAAGAGGGAAAAAAAATATCTTATGAAGTTTTGC…
>GbNAC118
CGGCTGTGTATTCGCACATGACCTACCACACGGGGCGACCACAAGCCCGTGTGGCGTCGACAGTTTCTTTTTTTTTTGGCTTTTGCCGAAGCTTTGTTTTCTGTGTTTCGGGTACACACCTGATATCATCTCGATGCAACAACACTCCTGAGCACTCCGAGACCTAAAAACAGAATACCCACAACAAATTTAGCCAACAACTCACAACCCTTCAAAAATAAACCTAAAGATGTGCATACACTTACTACCAACACACACATTTACTCACATCAATTCGACCGTTGAATAGAATCTGTTGTTTCACCCACTTCTCCTACGCATAAGATATCGCAAAGATTCAACCTTTAGAAATCAACAATTAAAGAATGCCACCGCAAGCTAACTTACCGATTAAACCGA…
>GbNAC119
ATTTTACTATTAGATGTTCATCTTCACTTTGCTTTTAAGTTTTCTTCATTAAAAATCTCAACTTTTTTTATTTTATTTTATTTTTCTTAAGCTTTTCTTTACTGACTACCATGTTGCTTTCTTTTATGGTTGTTAGCTTAGCTTTTAACATGAGTAACTAAACTCTTAAAGGGGTTTGTTGATAGAGATGTGGGTAAGATAATTTTTGGTTAAGGGACTAAATTGCAATAAATTGGACTAATTTGAATGAACAAAAAAATGTAGGATTAACGACCCTAAAGGAAGATTTAGGCAAATGAGACTGGGAGGTAATATTGTTGAGCACCAATTCTTTAGTCCCGGGTTAGCCGGTGTGATCAAGAGATAAATTAGACTAATTTTTCTAATTTGGTAAAGTTG…
>GbNAC120
ATAAAATCTACTAGTTAATATAAATACTAAACAATATATGATATACAAGTGGCACATGTTAAATATTTATAGATAAAATTGAAAGATAAAGATAACTATAAGGTACGAAAAAATAAAGATGGTTAGTAACTAAAGTATAAAGTGGTTGGACCGTCATTTTATCAACCAAAAATAATGATTGGAGGTAAGGAATTTAGAGCATAATTAAAATGATTAGAATGGTGACCTTTAAAAGTTCTAAACTAAATGCCCCAATTACGTGCCACTATTAGTGACATTTGCTCATAATAAAGTTAAAAAAAATCCCAATTTTCAATGGTAAATACCTGTTTTTTTTAATGAAATTTTAATTTTAAAAAATGAAATAATTCGGTTTGTTATTATGTTGTGTTAAAAAGA…
>GbNAC121
CAGATTTTTTTATGTTTTAGATTGAATCTATATTGGCCCATGCTTTTTTGAGCTTGGATTAGTTCAAGTTCGAATTTTTTCAAGTTTGAATTTTCTCATATTTGAATTGTTACGAGCACTGGTATGTACAAACAAACTTTTATATGCTTCACTATGATTTTCTAATTTTTTATTTTGAATTCTAACAAGAGATAATATATGTGAATATAATTGGAGGATATAATATGTTAAATATCACATTTTATCATTATAAAATTAGAAAGAAAGAAGAGGATAGAGATGAAAAGAAATTAAAATCGTGTTTGAGGGGAGCTTTAACCAGGATGTGGGGCATAAGGGAGTAGTGGCAGGGAGATGGATGGATAGTAAGAAAAATAAATAAACGATTGCCCATATATT…
>GbNAC122
TCATACGAATGAACCTAAAAACCAGTGGCTCTGCAGTTTAGTTTAGGCCCAGTAATGACGTGGTTAATTATAGTTTTCATAATCTGTTAATGGCGGTTTTGTGGAGTGAAGTGATGAATTAAACAATTGAATTACATTCTTATCGTATAAGATGAACGTACATCTCTATTTTTTAAACTAATTAAAATATTCATTGGATACAATTATTAGGTATCCATGTTTGAAAATGTCCAATTAACTCATCCTCATCCTTTTACTTTTCCCAATGTTTGAATCGGTGATGACTCATCATTCCCGCAACTAGATCAATAACCGTACTTGCTTTCTTTTGCCTTTTTCATACCATTGCTTTCCATTTTCACCATTTTTTTACTGTTTTTTTTTTAAATTTTAAAATAA…
>GbNAC123
AATGACAGTACCTATCAATGAATAAAAGAATATAACTTAGATTCAAGTCAATCTAAAGGTTAGTGTCGAAGATTGGAAAAGAATACTATTTAGATTTTAATTTGCTGATTCCTGATGTTTAAAACTATTTTATGGAAAAAAAAATTGAATTATAAAAGAGAAATAAAATGAGAGCTTTCAATAAAAACTTTCGATTAGTCCAGACAGTGCGAATAGATAAAGTCATAGAATAATAATTTTAGCAGAGATTGTATGTAGGTATTAACGTGACGTCCAAGTTTTGATTTTTATTTCTGCTGCAATTACAATCTTTTGTGGTGATAATATTTTTGCGAATTGATTTTTTTTAGCTTAAGCATTAATTGTTGAAGTTAAAAATCTATGGAAAAGGAAGAAGCT…
>GbNAC124
AATATATATTTTCTAAAACTAAAACATATAAGGTAAGAATGTGAAAATATTAATTATATTTAAGCATTTTATTGAATTTGTGTTTACTATTAATTGGGCTTATAAAAATATTTTTTAATTATAATTAATATTATAGAGACACTTTTTTTGAACAATCTTATTATAGATTCTGATTATATTTGCTTTGTTTTCATACGTCCCCTTAACCCATAAATAGGAAGATAATGCGCTTCAATGCACTCAAACCCACGTCCTCTTGTATTGACAACAATACCCATACCAATTGAGCTAAGACTTAATCGGGATGAGGACACTTTTGTGTTTTCATACGTTTATATCATTTAAAAAAATAAAAAAAAATTACAAATATTAATATGTTTAATAGTATTAAAATACAAA…
>GbNAC125
TCTTGTATTGTTTGTCAAATCACTCCAAAATAAATGGAAAAATTAACGTCTGTTAACTTTACTAATATGACATCCACGTGTATACCCATTACCAATTAATTAATTAATTTTTAAAAATTTATAATTTATAATTTTTAATAATTTTATATTTTTAAAAATAGTTTTTACAAATTTTTTGAATTTTTTAAAACTTAAAAAATTAATTAACTGTTGGTGTGGCAATTCACGTGTGTGCCATGTCAACAAAGTTAATATATGTTAATTTTTCCATCCTTTTTTGGGTGATTTGACAAACAATACAAGTTTAAGGGCTAAAAGAGGCGAAAAATTAAATGGAGGGATAAAATGATTTTTTTTATAAAGTTGAAGAGCAAAATAAGTCATCGTGCCTTAACAAAC…
>GbNAC126
CATATATTTAAATGCATTCGTGTTGGATTTATGGTAGTTGTTTTGGTATCATCATAATTTTAATTCATTTTATATTTTGTATGGTGTGGATTTTTATTTTTAGGTTTGCTTTATATCTCATTCATTAAAGATTTTGTATAATTCTTGCATAGTAATTCAATTTAGAAAAAAAAAAACATTGTACTGTGACATATTCATGTTGTCTTTCTGTGCTCAAAGTATTATTAAATATTTTTTTTAAACATTAATAATTAGGTATACATGTTCATGTTATTTTTGTCTCAATTTGTATTTTAATTAATTTTTCATCTTGCTTTCTCATATAATTTATTATATTTATTCCATTTTAATTTAATTTAAATAAATTTATTTTTTAAAAATATTATATTTTTCATACAT…
>GbNAC127
AATAATTATAGGAATTTTTTATTCTTTTGAGATGAATTTTTAAAGTGTTATTTTGGTAGGAATTGATTAATCTTTTAATATTATTGATATTGTTTTAAATGATAATTGTTTTTTTGACTTTGTTAAAAGTTAAAAGTATTTTAAGAAGTTACCTAAAAAGACTGATGAATTCAATAAAATAGGAGTTATTGAACTTACTACCTCTTCAAATAACCTCTTAAAGTACTGTGACGAAATCCGAAGACAAAACTTTACCGAAAAAGATAGGTAAGCAATGAGAAAAAGGAAAACCCAACAAATGAGCGTGTTAATCTACAAATATTCTAGAAGGGATAATATTCCGGTTATTATTACTATGATTTATGAACTTTGGTAGTGTACATCACGCTGTTAACAAAA…
>GbNAC128
TATTTTAAAATCAAACAAATCCTATTCATTCTCCCCTTCTTAATTTATGAGTTTCAGTCTAAATTAATATTTATATAAATAGATAAATGTTAACGTGCCGCTGGCATCAGAATAGACGTCACATGAAACAAAAGGATATTCATATAAACGGAATATAGTTATGTAGTAGAATGTGTAAGCTTAGATTATAATCTCAAAATTCAACCACATTATCATATTGTCCGACCTACAACTACAGGAAGGTGATAAAAAGAGATGAAATGTCCAGTTTTAAGGTTAGTATAAAAAAGTGGTTGCTCCGTCAATTTCCACACAAACTTCATGATTACTGGCATAGAATTTAAGACGATTAACGATCATCATATGGTTATGGCTTAGACACTAGCACACCCCCCTCTT…
>GbNAC129
AGTTTGAGATTTTATAGAGTCAAATTGGACATGAACCTTATGGTTTCAAGCTTTGGTGATGAGTAACTCTATATATTTCCTGTATTGCTTGTCTTCAAATGTTGATAACTTGTATTGGAATGGCAAGCTAAAAAGTATGAAAATTCCATTTCCACTGCTTTTGATGGAGGCTGCATTCTTTTGACTTAGGTGGAGTGGAGCCTGATTATGTTGAACAAGGTTAGGTTGCTGCTATGAGGTATGAATTGGCAGATTTAATAGTTTGTTTGGGTTCACTTCTTTATTCAATGAAGAAAATGGTTATTAGTAAATATTGTTGTGATTTTGGTGAATGGAATGGAGACATGTGGGGTTGCGAATAAAGGTTGTGCGGGTTTCCAAGGCTGATGGAATCTTTTT…
>GbNAC130
TTGTATCTAAAAAGTATTTTTTAGAAGTCATGTTAAACCAGCGCTAAGTCATATTTAAGTGCATAATATCTTTTAATTTAATACTTAGAAAATTTAAAAATAATTTAAAATTTTTATATAAAAGAAAAAAAATGTTAGCTAAAATAAGTATATATAAAAGAAAAAAATTATTTGTTCAAAAAAAAAGTATATGTATAAATTATATACATACTATTATTTAATTCTCTTATTAAATTAGTGTTGAATTGATTTGTGCCACCAATTCAATTAAAAAATAAGTAAAAATCATTTCTCATACAAAATAACTAATATTATTATAAAATTGTTTTTATATTTTTATATAAAATCTACCAAACTAAAATAAATTTTAAAAATTTACCCTCCTATAGCAGGATTTAA…
>GbNAC131
AATCATGTACATATTATATATGCAAACTATGCAAGTGAAATAAGCTTATTAAAATTAACCAAGAGAGTATGATGAAAGAATAATGAAGGTTATTTGTGAAAGCCTTTGGTCTTGATTTGGTCTACAGATATAGGTCCAGAAAGTCAAATGATTTGGTTTTTAGGGATTTGAATTCCATAACTCTGAAAGATAGGCGAGTTTTTCACCAAAAATGGTCAGCAGAGATGTTCAGGGTTTAGGGCAAGTGGTCCCAATTAATTTGTGCATTAAACTTGATGAATTACCACCTTAATTTGTGTGTTTATAAAATTATCTCTTTACTGATACGGGAAATACTATATATTATAAATCTGACAAAATCAGTCGGATAGAAGCTCTGGGAATGGAATAGAAGCTGAA…
>GbNAC132
AGAATGTGAACAAATAGCTTGAGCTGACGTGGAAAGTTAAGATCCAGCTCAGCATCTTCAGTTCATAAAAAAAGTCCATGGCACTGAATTTTTGGTTGGTCTTTTAGGTCCCCACCTAATCTCTTCATTTGATTTTATTAACTAATTCTACTTACTAATTATCATTATTATATATAGAGTTTGCTCATCTTAGATTGATTCAAAATTTTGTGCATACATAAATACCAAACATGTAATAATTACGTGGACTTTTTAAAATTTTTAAATAAAGTTTAAGAGTTGACAATTATTTTATAAAGATATAATATATTATTAAAAAATATTTATTTAATTTAAAAAAAAGATATTATTAATGTATTAAATACTTATCCACAGTTAAGTATTAAAACATGTACCAAA…
>GbNAC133
ATAACATCTCAATGACTTGACACCTAAAATTTCTTCTAGAAAATATGGGTAATTAACCTCACATTACCTTTCTAATGGAATTTTTAGAATGTCAACTAATCATGATTTCTGGGTGCACATCAATATAATTTTCATAACTACTGTCTTCAGATTTTAGCTTTAAAACATTGATTTTTCAACAAGAGATGCATTGAATTCCATCTTCTACTGTGCAGTGTTTTAATGCAATAAGATTATCACTTACGAAACGCCCATTGTTTCATTTATATACATCCACTAATAGTGGATAGGATGCCAATCCTAATTATATATTTAAAAGGATAATTATTCTATATACGGATTATAAAATAAAAAAAAATTATATCCTAAAATTATAATAAAATAAAAATTAATTAAAAA…
>GbNAC134
TCCCCAACTCATAAATAGAAGGAAAATGCGCTTCAGTATACTAGAACCCACACCGCCTACATTGATAACAATGTTCATATCAATCAAGCTAAGACTCAATCAACTAAATTATCCCTTTAAAAAAAAAGAACAGATATTCCCATTACCAATCTTGAAACATGAATGTATTAATGACAAATATTAAAGAGGCATTTGATTCAAGAGATGGAAGATTACTACAAGTAATAATATTACATTATTAGTTGAATGTAGGATTACTTAATTAGCATATTACTGGGTATGTTATATTAAATTGTTTGGTTCATTTGATTAGAATGTAAAATTTTATTATATGATTCACAAATTTGATATTACATTTAACATAGTATTATTATAATTAAAATATTAATTTTTATTTTA…
>GbNAC135
TCATAGCCTTCATTTTCAAACTTTATATCAACAAATCATAAAATGATATATCAATACAATAAGTTGTAACCTATAAGAAGGTCCTTAACCTTCCCTTTGTTGACACGCGTGTGATTTCCTCTTTTTATATTTTTCTAAAATGATTAATTTTCAGTTTTAGTCTCTATGTTATTTTTAACTTTGAGGTTTAATCTTTATACTTCATTTTTAATCGATCCCTATATTTTTATAATGTTATTAGTTAGTCCAAATAATTAATATCGTTATCTTTTCAATCAAAATGTTACGTGTTTATATATAATTTGAATGCCTTAATGATCTTAGAGATTGATAAGTGGCTTCTCATTTCTTTTGGATTTGCCTTGATCTTTTTTTCTTTTTTCTTTTTTTTACATTTTA…
>GbNAC136
AATATACCATTGTAAAGGTCTCATGGAGTAGAATTTGAAACTATAATTTTATGATTCAACTCGCCACATTTACCTATTGAGAATATGCCTCAAAGTTCTCATAAAGTGTAATTTTTCCAACAACGGTTATGTTTAAAGCTTGTGGCTAGCAAAGATGTTTGCTGAGCAGGTGGAGTGTCTCTAAAAGCGGGAGGTTTAGGTGTTTCAAGAAGACGCATGCAGTCCAAGTCTCTTGCTATGATAGAGGGTCTAACAGTGAGTAAGAATCTGAGAGAGACAGTTACCAAGGTGTTCGAGCAGAGCCAAAGGATTGGTCATGATTATTTCTCAGATGGCTTGTCACGCTGACACGTGTCTACCTGTAGTGGAAGTATAATAATTTACGGTTTATTTTTTGTC…
>GbNAC137
TTTTCCACGTAAAAGTTATTCTGTGTGTTGTTTAGTGGTTATTAATTCAAATTATGGTTTACTATTCAACTGAAGTTTATTTTCTTAAAAAAAAAATATTTAACTTAATCCAATCAAGCCATAAGTTTCGAGATGAATTGTACCTGGATTCCACTTAATTTATATCTATATTTTTTGGTTAGGGATTTGGAGTTAGGCAAGATTCTTGGTTGTTTTATATATATATATAATTAGTTGATGAATAAACCAAAAAAATCACCCATTAAATTTTTTTTAAAAAAAATGACTGGAAATAAATAAATAAATAAATAAATACAAGCAATCCATGTTTATATCACAAGTGTGTAGGCAGATTATTCAAGAATTGACTTAACCCAATTCTTTTGTTTTCTTCATTTA…
>GbNAC138
AGAAGATCAAAAAAACAAATAAAAATGTTAATATGATCTTATAAATCCTTTTTTAATTACTTTATAATCTAATTTAATGAAATTCCACTGATAACATTAAACTTAAATTATTAAAATTCAAATACTAAAGTAATTAAATCTTTTAAATAAAAAAAAAAGATTAAAAGAGTGCCAGAACTAATAGCGCAAATACACCTATATTAAAATTCATTAAAATCAAACCATAGTTTTTTAATTTTCATTAATATTTTAAAGAGAGAAATAAATTTATAAGTTGTATTAGAATAAAAGTGTTATGGATATATATTAAGAGTTATATAGTTTTTTGTCTTTTCTGCTAAAAATAGATAAGTTAAACGACTAACTTTTAATAATAAAAATAAATAGAATTTTTAAAAT…
>GbNAC139
TTGACGTTGAAATTTGAAATTTAAAAAGCAGATAGATTAAATTCTTAAAAATAAAAACCTAGAGACTAAATATAAAATTTTGGAAGAGTATAGGGACTGATGGCATATTTTAACCGGTAATTTTTTCTCGAGAAAATTGAGTTGTGAGAGGAAAGAATCTTTCAAATGGTTTCCTTGTACGGAAGGGGAAAATGGATATAATTCGAATTCCATTGAAGAATCTGAGAAAAAAGAATCTACTGGTTCTGGTTCTTCTTCATCATCTACTACTACTAATGGTGTTCTCAAATTTGGATGAGAGCATATCCAATGGAAAGCTTAAGGGGTTATTCTCAATATAGTACCATTCGTCATGCAAGATCGGTTATCGTACTTGGTTAAGTTCAATTAGTTCTGGTA…
>GbNAC140
TCGATTCTCATCCATGAAAATGAATCACATTTTATGACTAACCGTTTACTTCTTTAGAAAGCATATGCACCCACCCTAAGCTCAACCCATCCTTTTTCATTATTAAAATATTAAAAATTTATTGTGTTTTCATTTTTAAATACTTAAATATATTTCATTAACAATTTTAAAATATTATTTAGTAATATAAAAATCTTTATCAAGGCTTGGCTCGGCTCGGTTGTACTTGTAGCAGAGCTTAAGCCGAATTAACTTATTAATTAAGGAAAATGCCAATAATATTAACTCAAACTTGAGCCTATTTATTATATAGTAAATTACACCCGTGGTTACTTTTGTTTACCTCAGGTTACATTTTAGTTACTTATATTATCGTGTTGTAACATTTTAGTCACTAAA…
>GbNAC141
TAAAGCTTTGCATAGAATTTAGATAAGGTCTTATTGTCATGCATTGTTAAAGTCTCAAATCTCGTAGTCAGCATTTGAATTTGGATTGCTTCACAATTGGTCCTTTATAAGTAGTTTCAAGAATAGTCTAAGCTTCTCTAGCAAATGATCATTTAAGATATTGACCTAAAATCTTGAGGATCAACTCTAGAGAAAATTACCTTAAAGTCTTGGAGTTTGCATTGGCCAATTTCTCATCATCATTGGTCTAAGTTACTTTAGGTTTGAGATTTCTCACACTATATACACTAGTTATTGGTAGCTCCTAACCAGTCAAAATTGAGTGCTAAGATTTTTCATCCATGAACTTGATAAAAGCATCATCCTTACCTTCTAGTAGGCATAGTTTGTTCCATCCAA…
>GbNAC142
TCAAACCGAGATTTTTCCAATATTAACAACATAGTCAAAGTTAAAAACTTGTGTCCAAGTTAGGTAAAGAATTATGCAAACTAAAGCAATCTTCGAGAGCTTGGTTGAAAAGCTCAAAGTGTTTATATTATCAATAGGTTTCTCCTTAACAATGTCAAATTGCTTCCTTATTTGTGAGTAATACATAACAGAGTGTTATATATTGTTTATGGATAAACTACACCTAAGGTCATTCAACGATTAGTTAGTTTATGGTATGGTCACTCAATTCCAAAAACTTACAAATTGATCACAAAACTATTTGAAAGTTTCAAGTTGGTCACAAGCTTGTTAAGTTGCTAAATGATGTTAGATGTGGAGATATGTAAATTTACAATTTGATCACTCAATTTCAATAGG…
>GbNAC143
TAACAAATTATGGCCTCATAATTGCATCACCGTTGAAATCACAAGATAAGTTTTTGTTCTTTTTGTATTATCTATATTTAAAATTGAAAATAAAAATTGAGTTTAAAATTTTTTAGTCTTGATTTGATAATAAGAAAATTATATGTAGATTCTCTTCGAAATTTATTTTGATTTAACCTTCACATTAGTAGGTTATTGAATTGTTATAATAGATGCCGATAATGGCAATAGAATGAACGAAAAATAAGAAAAATAAAAACACACAAAAACCACGGTAGAGGAGAAGAAAACCACAAATGTTGAAAAACAAATGATACAAGAGGGGTTTCGACTATATCTATTTAAAGATTGAAAAACCCTATTCTAATTAATATCAAATAAAATAAGTGTAGTTTTATA…
>GbNAC144
AAAAATCAAAATTTTAAACATAAGGTTTTTTATAGGATAATATAATAAAATAAATAAAATTGACTTAGAGTGTGTTTGATAAACCATTGAAAATTTTCATTTCATTGAAAATGAAAATTTTTAACATTTAATATTTTGAACGTGTTTGGCAATCATTTTAATATTTTTACTTAATATAAAATTTTCAACAAAAAAGTGTCGAATAAGATAAGTAGGTAATGGCTACTTACCACTTAATTTGGAAAATATTAAGTTAGTCTTAATTTATTAAAAAATTGGAATAAATGATCTTTTTTAAAAAATAAAATAATCAAACTAATATATTTATCCACCATCCAAGATTATACAAAATAATATAAAATATTATATTAGTAAGATTAAAATTAAAAAACTAATAAT…
>GbNAC145
ACGATTATATAAGAAATTATTTAATATGTAAATAAAAAACACTCAGTAATGTACCCAAAAAACTTTAAAATTATTTTAAAATAATAGTATTTTAAATTTTCCATTTTTAACAAATATTTTTCTATTTTTTTATTTCAAATTATTTCTAAGTGTCATTATTTCAAATTTATCCATTTTTAACAAATATTCAATTAAAAATAAATAGAATTTTAATTAATATAAATAAAAAAATTAAATAGTAATTAGACAAATAAAATGTTTTTGCGGCGCTTTTCTAAAAAACGCTGCTAAAGACCAGAGCATTAGCGGCGCTTCTCCAAAAACGCCGCTAAAAACCAGAGCATTAGCGGCGCTTTTCTAAAAACGCCGCTAATGTCCCGAAAGGTCGATCTTTAGCGG…
>GbNAC146
CCATTGTCCATCTCTACTTTTGCTAGGTTTCATAGTTTACTTCAAGTCTTAACTCTTGCGAAACTGGGTGAAGCCGGGTGAATATTAGAGTATAGACTCTATTAGTCTGTTACCATTTTATTATATAGGTTCGAATATTGTTAGCAAATAGTAGCAGCAGTTAATCATAGCAGTTAGTCATTCAAGTATAAATTGTATTAATGTATTATTCAAGGTAAGCAAATAATATCAGAAGAGATTAAACGTGTTCATTCTTCTTTCTTGGTTATTCTCATAATACAGTTGTTAATGGACATGGGAGTGTTTTAAGTCTTAAATTGATGGCCAGGCCTAGCAGAGTTGACTGGGCCACTCTCCTTTGATTGGTTAGTATAAATTCGACCCTACATGTTTCCTCTT…
>GbNAC147
ATTCACTTGCATAGATGTAAAACTAAACACCGATGTAAAATTAATATGATTTTACACCATTTTGTAACTTTTTATACAATTAATATTTTATAATCCAACTATTACATTTATCAAAGTATTTTTACTTGTAATGCATGTAAATTTTTGAATCGATCTAATATTTCTACTATCATATCGAATTAAAATATTATTTATATTAATATATATTTAATAGTTTATTTTTAGTTAAAAATTTTAATTTATACCGAACTTGACATGCATGATCTAATGAATGGAGCATGAAATATGAAGATTGAATTATTAAAATATTAACCATATAAAAAATTATGAAAAAATGTAAAATTATTTTAATTTTGCTAAGTAAATTTTTACTTATAATTAAAATATTGAATTGAAAAC…
>GbNAC148
ATTATTAAATTCAAATACTAAAGTAATTAAATCTTTAAAAAAAAAAGATTAAAAGAGTGCTAGAACTAATAGAGCAAATACACCTATATTACAATTCATTAAAATCAAACCCCTTTCATGAGGTCCTTAATTTTTTTTTATATTTAAGTATAATAGAGAGGGGGGAGGACAGAGATTTTTTTTTTAATTTTCATTAATATTTTAAAGAGAGAAATAAATTTATAAGTTGTATTAGAATAAAAGTTTTATGGATATATTAAGAGTTATATAGCATTTTGTCTTTTCTACTAAAAAATAAATAAATTAAACCTTATATATTAGATAAAAATGAATAGAATTTCTAAAATTAGATTGTTTTTGTTATCTAATGTATACTTTTTTTTTAATATAAAAGATAAA…
>GbNAC149
TTTTTAAATAATATTTATTTAAAGCTTTATTTTTGTTTAAAACATAAAGAAAAAAACCTATACTGATGAATAACTTTAAAAATGAAATATGAACAATATAAAAAACAAATATGATATTAATGTGTAATTAAATAAATATTATGATAATTTTAGGTAATATTATTTTTTAAAAATTCTACTAAAATTAAAAAATAAGATTAAATACAAAAAAAATATTTAAAATTATTTTGATACGGTTTAAAATTTATTTTAATATCATAAATTGAATGATTATTTGTCAAATACTTTATTTTAATTTTTTTATTTATACCATTTGTGAATCCATTAAATTTAATAAATAATATTCATTAATTTAATTTAGTATAATTATTTGTCAAATTCTATGTTACTATTTCTATA…
>GbNAC150
TTGAAACATGTGATTCAACTTTAAAAAGCTCATTTAGGTGCCAATTAAAATTTAAAAGCTTATTCAAGTACCAATTATAGTATAAAGACTTGTTTAGGTATAATAAAAGTATAAAAGTATGTTTAAATAACGTGATAGAATTCAAAGATTAATTATTTAATATATTTCTCAATCAATATTTTTCATTTATAAATTCATTACAACTACCAATATCTAAGCGGAGAACGCAGTCAGAAAATTCAAACATTAAGTAGATTCAAACATGCATCTACTATATTTTAATAAAGTTTTTTTTCTTACAAAAACATCTTTCATGTTGTCATAAATTTCTCATTAAAAAAAATTACTTACAGACTATTTTAGGAATTTCTTCATAAAAAAGCTATTACTTTAAGAAGA…
>GbNAC151
AAAACTAAATATCATTAGATTAATACTAAACACTGGCATCGGACTTTTACAGTCCAAATATATAAATTAATATATTTCAGCTTTGTGTATTAGGAGTTGGTTAAATAATTCAAACCCAAAAACTATAAATATATATATTTATATGTGATTTTTGGGATTTCATTTGTCTTGACTTGAAATTGGATAGGCAAAAAGTATCATGGGATTTGCATTAAAAAAATTGCAAGTTATTATCCCTAGACGCTGCTGATTTTGTAGCTTCTTGAGATTCTTCCATTAAACAAAACTTCAAAATTACAAGTAATTACAAAATATGAGTTTGTTGTAGAATTTGATGGACCCTTGCTGATTCAAATGCTAAGAATTATGGTTTTTTTGAGTTTTGAATTTCTCTTGTGA…
>GbNAC152
ACATTTTTCTAATATATATTGGATTAATTTTCAACTAATTTGACCATAACATATGCATTTTATTCTTACTATTTATATAATAATTAAAATCCAAATCCAAGTTCTCGAATGGAGCATAAAGAAATTAGGATTGATTAGAAATTTAGTATTTTTTTATTTAGAATGCGTTGTTGCTATTGTAATTATTGTAAATTTTGTGTTTGAAAAATTAGTATGTTGCATTCTCATGACACCAAAAAGTACTTAAATGGTGTTTATTTATGTGAAAGAAAATTACAAGTGATATGTTGACTTCATGAAAATTTTTATATGTTTAAAGCTTAAATAAATTTGTTCTAAATGTTTAACATGGATGGGAAAATATTTAAAATTATGCATTAATTTATAAAAAAAATGTAT…
>GbNAC153
CCAAGGCAAAATAATTTGAACATAAAACAACTCTAACCGATAAAATTTGCCTCAAATCCAAATATTTAAGTTTGTATGCATCCATTTGTCACACTAAAAGCTTATTTGTATTGGATGAAAATTAAAATTCATAAATAGGCGAAGATAAATACTCCAAAAATTGTCCACCTTCCAAATTGGTTGGCAACTTTCAAGTTGCTGGGTTGCACCCGACAGATACCCCATTGGACGGAACCCTAATTCACAAACATTGCCATCTATGGGTCTATCTCAATACTTACGTGGTAAAGTTGGAAAGGTTAAACATCCTCAACTTGTTGTCTTAGTCGCACGTTAATCATGTTTCACTGCTGCTTGTCCGGATTATAACATTTATCTATCCAACTTCATTTAATTTTC…
>GbNAC154
TATTTCACAGTATCGGGGACTGTTTTTCCATAATTTTAATGGTTCTTTACTAAAATTATTTTCAAGAATTTTAAACAACCAATGATTTGTTTCTAGTTGTTTAATTTGTTCTTTTCTTGTTGGTGTAAAGTTTTCATCGCATATAAACTTATGATTTTCTACAAGTGGTATTTCTACTGAAAAATTTTCTACAGATATGAAAATAACATTTCATCTCTGAGTAAGGGTATAAATAGTCTTCTTGATATCTTCTTTTAATTTTAGAATATATATCCTAAAAGAATTTTTGCCATAAAAAGCAAACATTCACTTTGGACTTTAGGTCAATACTTGTAATGGTTTTTGTTTAGTCAACTCTCTTAGTCAGAATGAGGTAGAAAAAATGAGTGTTAATTTGGT…
>GbNAC155
TTCCGACAATCCACTTTAAAAGCTAATCCCACTTTTTATATTATTCGTAGAGTCGTCAAGTCAACAGTTTACCAATGATTCGGTGAACATGCTCACACCACATGTTATCTTATTCCTAATTATTTAATACTCTCAATCTCTGAAATTACGGCTTGACCATTTCAAATTTTCATTTAAAATACATAAAATATTTAAATCCATCAATTTAATAAAAGTTCTTTTAATTGAACATTATTTACAAAAAAAAAATACAATGAATTCTTTTAGTAAATGAGTTATTTTACTATGTATCTTTAAATTGTATTTAAAAATAAATAAATAAATAAAAATCTCAATTATAAATTTTCATTATCTGCTTATTTCAAAAAAAAAATTATCCTCTTAATATCAAATAATTAT…
>GbNAC156
CAAAAAATTTCAAATTTATAAATAAAATTACCTTTTTTTCCCTTTTTTTTTCCTTTCTTCCCTCTTCTTCTTCTTTTTTTTTCTCTTCTCCTTTCCCTTTCTTTCCTTCTTTCTTTCTTTTTTCTTCTCTTCTCCTTTTCTTCTTCTTTCTTTCCTTTTTTCTCTTCTCCTTTCCTTTTCTTTCTTTCCTCTCCTTTCTTTCTTTCTTCCCTCTCCTTTCTTTCTTTCCTTTTTTCTCTTCTGCCCCACCACCGACCCCCCCCCATAAAACCCATTGGTGCCGCCAATGGTATTGGCACCATTGGTGCCGCCAATGATTTTGGCACCTTTGGTGCCGCCAATACCATTGGGGTGACCAGTACATTGTCAGATTTTTTTTTTGGTTTTGTTTTTTTTTGG…
>GbNAC157
AACCCACACATGGAAAACACAAATGGTGAGACTCAGGGGCAAAGTTAAACATTTTATTATGGAGGGTCGAAATCAAATTGTAAAATTTTGGAAGGTCAGAATTAAAATTTTACCATTTTATTATGTATATTCAAGGGCTTATAAGGTAATTTCACTAAATTAAGTGGGTGAAGGCTCCTACCTACCCTTTTTTATATCATGTGTAGTGAGATTTGAACCTATGTGCCCAAAGGCTTACGGTTTTAGTCTTAACTAACAATGTCAAAGCTTCATTGGCACAAGAATTTATATTTATATAAGTTCATACACCATTAATGAATCATAAGATGTCATTTGAAAAAAAATGAATTTATTTATCTTTAATGATTTTTAAAATTATTTTTTAATTTATTAATATAT…
>GbNAC158
TCACAACAATATTATTCGACAATGATTAAATAAATGTTGGACAATAATTAGTCACAACAATATTATATCTTTCTCATTGCAAGTTATGTCTACATCAACCGAAGTGCTTCTTAAAGGAGGTAAGTCCGAGACCCAACTCCCTCAGCACTTGTATAACAAATTTATAGATAAGAATAAAATAAAACAAAACCTCAAAAACAAGCGAAACTAGGGAAAAAGGAAGTAGTAGCTTGAGATGTATATCCCTTCTAAAATTACATGAAATGTGGTGTTTGAAAACATAAAACGAGAGGGTAGTGGGGAAGCAAAAAGCGGCAAATATTTTTTATTTCGTCAAATATACTATTATTAGATGCTCTTGCCTCTATACCATATTCAACACTCCATACATAATTATAT…
>GbNAC159
GCATCATCCATTGAAGATCGTCGATCGACCTCCGGGTATGTTGTGTTCCTAGGCTCAAATCTGGTCGCTTGGTGCTCAAAGAAGCAGCTGTTTGGTGCGACAACAACTGTTGGCTGAAGTAGGCATTTCTCCCTCAAAAGTGCCAGTTGTTTGGTGCGACAATTCCTCTGCAGTCTCTGTGGTTGAGAATCCCACACATCATGCTAAAATGAAGCATGTTGAAATAGATCATCATTTTGTCAGGGAAAAAATTCTTGCAGGTCATTTACAAGTCAACTTTGTGCCATCTGATCAACAAATTGCAGATGTTCTAACTAAACCAATTACACCTAAGATGTTTTCTATGTTTCAATATGCTCTTAGGGTTTTGTCACCTGATGAGCTTAAAGCTCAAAAATC…
>GbNAC160
ATTATTTTTCATTTGTTTTGGGTTTAAGCTTTTGTTTGTTCTGGAATAATTTTTTTTAATTTATAATATTGCATGTGAAAGAAAATAACATCTTTGTATACATTTTATGTCACCTTGACCACACTAATTAATTTCCCCATTAGGGACTTTGTAAAGAATTTAGTAAAATGGTCCCATTATTAAAATAAAATTAAAATTTTGAGTTCGAGTTCGAGTTCAAGTCATTAAATTATATAGTTTAGATGCTATGTATGAATTTGCTTTGATTTCGGTTTAAATATATTTCGATTATAAATATGACTATATGTTATAATATTGAGTATAATTATTCAGATTATATCATGCATTTATAATTGTAATCGGAAGTTTTATTTTAATTGATTTTATATTATATATATA…
>GbNAC161
TAAAACAAAAGCAAAGTGTTTTGTCTGACTCAAGATGACATGGAAGGTGCTTAGCCCAAGAAAACCCAAATTCCCCACTCTGTGCTCCTTTCCTTTGACTACTATTCTCCGTTTATTTTCTATTTCTTTTACAAATAATTTATTTTAAAGGTATGATACACCTCTTAACTTTAAAAAGTTATTAAATGGTCATTAAATTATTTAAAAATTTTCATTTAAGTCACTAAACTATTTGAAAGCTTTTATCTATGTCGTTGAGTTGTTAAGTTTTCTTTTTAAAGTGTGGCTATCGAGCTTTAAGTGACAATTCGACGATCAGTATGGTGGATCAATACTTATTGGCGAGTAGAAAAACATACCTTAGATCCAGGTCGACCTGATGGTCAATGTTGAAGATCA…
>GbNAC162
TTTTAATGAGTCGGGTTTGGATAAAATTTTAAACCTATTTTTCGAGTTGGACCATACCCAAATCTAAAAAGTAGACCTAAAATTCTACAACGACCCGATCCATAATCAAGTCTATGTTGAACAAAAAAAATTAGTGTCAACCATGGAATAATAAATTAAAATATAAATGATATAATTAAAATTAGTGTGGTAATTCAACGGGATAAATTAAGGAAAAATTAGTCCCAATCACCGAAAAATACCCTAAAAATGAATAAATTATAATTTTACCCCGAATAATACCCAATCACTTTTTTTTTATGACCTTTCACCTTTTTATGCCACATTATAACATATTTTATATGAATTAGCACACACAATGTAGGTTAATTTAGGGTGACTTTGGATGGACAGTACATT…
>GbNAC163
TAAGAACGGGCAAAAGCATGCTCATGTCAGTGCGTTTTTGCTGACTCGGGGTAAAGCTTGTCCCCGTTAGTGTGTTTTTCTGAAATTTCCTCTTAAAACACTTCCATATAGGCGCATTTTAACTTTTTTTTACCCATTTTAATAAATAAAGTTTAAAGTTCATTTTCGTAAATAAAGTAGGAAATTAATTTTTTAATAAAATAGTCATAATAATGGGAAATTGACACTACGAAACATTTACAACAATCAACGGTTCTTAATGTTACTTAGGTTATCTTTGGATCAATGTTTTTTGGTGCGTTGCAGGTTTTAGTGCAATTTACTCTTTTAGGGTGGGTTTGGATGGGCGATTGGGTGCGATGCGGTGCGTTTAGTTTACTTTTTGTCTCACGCTACAGT…
>GbNAC164
CCCTTCTAGTGATTCCATGAAGTTTACTACTTCTGGTGATGAGACAGGAAAATTATTTTCATGGTACGATCATCTCAACATGCAAAAGTCTCCTTACAGTTCTAGTGAAATGAGCAAACAGTGGAAAAATTGAATGCCTGAAGAGGCAAAAGAACATATATGTCCATCTAGATCGTCCAACTGTATAAGGAAACTTTCCTTACAGGAGCTTATACTTTCTCTTCAAGTTGTCTTAGTTGAAGCTGACATGGTTAGTGTGGGGATCACTAAGGGTATTGACGAAACAAAGGTGAAAAAGAAAGAGACTGAAAATGCTTACCAGTCTACCATGGGAGCACTAGAAAGGGCTCACGAATTACATAATAGCTTAGATGAAGAAAACAAGAAATTAGTGGAGCA…
>GbNAC165
TTGGCTATCACGTGGCTTAACCGTAAAAATGGGGCTCGGAATCATTTTACTCTTTTTAATTACAATAATTGCAGTGAGGCCAAATACAAAAGGCGGTTAAATTTCCCCTTTTCCACATTGATCGAAACTCATCGTAACACCCTGAGATTTGGGGGTTTATTGTATCAATCCAAAACAAAACTTGATTAAGAGGTCTAACTTAAAAAACATGTTTTACTTAAATTAGGACCTAATTGAAAAAAGGTAAAAATGAATTAAAATAAAGAGACCTAACTATGAATATTAATTATTGAATATTAAAGTAGAATGTGTTAGGAATTATGTATTGAATAAGCTAAAGAAGGGGAAAAAAAGGTAAATGTGTAAGATATTAAGGAATATGTAAGATAAGATCTAATA…
>GbNAC166
TCACAAAAGAAATTTAACCACTATTGTTAGATATGAAAAAAAAGAGAAAAGACGTAAGGACAGGTGTCAAAGAAGGAAGACCTTAGGGCCTTCCTTTATATAGTAGTATAAATAAGTAATAATTTTAGATTAAAATATACTTTTATAGAATTTTATATTCAGACTCTATAGTTTAAAAGTTTTATACTTTTATAAAATAAGTAATAATTATTGTTGGTAATTTCCAATAAAATTGGTCAGCGCTCCATTTTTATTTTTTGTTAATCATATTTCTTATCATATGAGAGTAGATTAATGAACATATTAAATTGACAAATTTTAATAAAAAATACTAATAATATTAATGATTAGACTAAGAATTTTAAATAAAAAAAAGTATGACTTAATATTTTTTTTTAT…
>GbNAC167
CTTCACCAATACCTAAAGTAGTGGGTAGCACTGCTTCTGACACTACTCAATTTCTACTTGCAATTATTGATTTTAGACCTAACAAATTTAATTAAATTTTGATACATAATTCTGAAAACTTTTCATGTTTGGACTCAAAATTGGTTGGATTCACTCATTTTCATTGTTTGCATTATAAAATATTTTTAAAATATGTTAACATTAATATTTTACTCACAATTTAAATTACTTAAATTCAAATCAAATTAAACTAAATTAAAATTAAAAAATAAAATTATTTCAATAAACCATTCGAGATAGAAACAAGTATAGAGGGAAGTGGATGGTAGAGCCAAAGTATATAATTGGATCAAGCGCAGGACAAATTATGTATGAAATTAGAAAGATGAAGATGAAGCT…
>GbNAC168
TCTGTCACCAACTTATCTCTTCCCCACCATTTTGTGATCTTCTTGTTTATACTTAATTATACTTACTTTATTAAAGGGTAATTTCGCAAAGTTTAGTTTACGAAATTGCTCCTTTCTTCATTTATCACATCATATTGAAATTTAAAAATTAATTAATTTTGTATAAGTATACTTAAAATATACGTTTTAATTTTTTTAATAATTAATAAATTATTTGTAAATTTAATTACACATGAAATGTTTTTTAAATTTTAAATATAATAATAAATATTATGTAAATAATTATAATCATATTTTTAAAATAATACTTAAATTATTTAATATAATAACACATAAAATATAAATTAATCTAAATTCTAAAATGTATTTTAAATAATTAATATAAATAAGAATATTTTG…
>GbNAC169
TTGGATAATCTGAAGAGCAATCTGATTCTTCTCATTCCCTTTGGGACAAAAAGAGAAACCTAATCTAAGGTTGCTCACACTCACAACTTGAATTATATTTGTCCCACTATTTTTTAATTTATTTGTTATTATCAAAATTGAAAAAAGGAAAAATAAAATCCCTTGCGGGATATATTCTTCCCTGTCCAATAAAATTACATAATTCTTTCAGTAATAATAAAATCAGATAGAAAAGAAAAAAGAAGCAATCATGGCAACCTATCTGTTGTGACCAACATATTTTCGGTCCTTTCATCATTCAGTCCCTTAATTTCATCTGATCAAAATTTTCCATATTTGGGCCCCACATAATCTGGGTCTTTCTTTCATTGTTCCTTTCACTTGGACTCTATTATTTGT…
>GbNAC170
ATGTTCATTCCATGCTAACCCATCCAAAGGTTGTTTAATAAACAAGGCTCAATTCTTGTATAACTATAACAGTCCATTGGTTGGAACTTAAAAAAAATGGTGCTTTTAATAAACAAATTTCTCAACGTTTCTCACTCCTCTCTTTCATCCACCATAACTCTTTTTTCATCTTTTTTTTCTTCGTTGACAACCGTACTGTTTCGTGTTCATTTCATTGTTGCCTGCCATTTGTTCGCTGCCATTCCTAACCCTTCACTTACGTTCCTGGGAACCAACATCTTTCGCATAATATGCAACATTACGATTTCTCATATCTAATTAGAACTTGTCTCACATTTTAATTAGTAAAACAGTTCAAAACCATAAATTCCAAGAACATCCTTCCTGGCAGTATATGGA…
>GbNAC171
AAATGAACTTGGACATCCATTTGTTGAATCTTTTAAATAAAATTTTAAATTTTCTCAATGACCACATCAGCATATTAATGAATTAATTGACTCGTTTTAACGTTTACTTTCCTTTTTTGAAGTGACTTGATTGAATTTTTTTTGTCGTTGAAAAGTTCAATAGCTTCATGGACCATTAAGCCGAAAAAGTATCATTAAAACTTAAGATTGATAATTTCTTTTTTTTTACAGGCAATATTCAAGTTATCTATATAATATGAAAATACGTGTTTACCCTTTAACCAATATTTAATATCAAGTCTAAGCTAACGTTGCCCTAATTAGTAAAAGGATTTACTTAATATAATACTAATATTTTGAGATGTAGGAATTGGAAAATAGATGTATGGTATTAGTAAT…
>GbNAC172
GAAGGTAAGCCTCAGAGTTGCCTCTGATTTGAGTTTTTAAATGAATCTGTTGTGGCTATTTATGATATCTGTATTGCAGCACAAATATGTTTCCATGAATAAGCGCGATAGATTGACGGCATCCGTAGCTCCTCATGCTTGCAAGATGTATGTTCTGACACCACTCCAAAGTTGAAGGAGGCTATCACTTTATTGAACTTTTAGGATAGTTTAGCATTTTTAATTTTTGTCCATAGCCCCCTTTGGATCTTTTTTTTTCCTTATTGAGTGTTGAGGGAGAATCTAGTAAATGCAAAATAAATGATTTCATCTGAAGTAAATAAAATTCAATTATATTTGAGTCAGGGTATGATGAATCGATTTCAATTCGATGTCTTGTGATATGAGCAAAGTATATGA…
>GbNAC173
AAATATCTCATTAAAATAATAATAAAATAATATTTATCTAATTAAATAATTATAAAATATCATAAAAATATCTCTAATATCATCATTGCCTTCTAGAGTTCTCTCTCTTTCTAACTGACCATTTCACCCTTTATGATATTTTAAAATTTCATCTTTGAGTCATCACTTAATTTGGTAAAATTATGATTTAGTCTCTCATAATTCTTCACCTATTAAATTTGGTCCATTTTCCTTAATTTCTAAATCATTCCACCCTTAAAATATTTGCACTATTGGTCTTTCAAGTTTTTCATATTTACACTTTATCCTCTCAAATTTTAAGTATTTACTATTGGGCAACAAAACTTTTCTCACTTTTGCGATTTAATCCTTTCTTGAATTAATATGTCATAACTCAAA…
>GbNAC174
TTGGGTAAATTTCATAAATAGTCATCCAATTATAAAAAATTTTCATTTTAGGCGTCTAAACAAAAATTTTACAATTTAAGCACCCACGTTACATAGTTCGATCGTTTTGCTCATTCTCGTTAAAATAAAAAACGATAACCTCAAATGGTAGTTAAAAAAATTAGTATAATAACAAATTTAGCCTCGAATTTTACATATTATATCAATTTAGTCATAATTTTAAAAAATCAACCCTCAAAATTTACAAGTCTTAATTTGATCCTAATTCTAAAAAAAATCAAAGAAACATATAAAAATACATAAATATTTTTAAAAATATAATAATAAATTTAAATTTTATATTAATATTAATAAATATAAATATATTGATATTAAATAAAATAAAAATTCTCTCATCTG…
>GbNAC175
ATTTTTTTTGTCAAAAAGCTTAACTTGGATAAAAATTTTTACGATCCAGTTTCAATTTAAATATTAAAAAGTATTTTTAAATTTAAATTTAATTATAAAATATTAATTAAGAATATATTTTTTAATATTTTATTTATTTTTTAATAGTGGAATGAGCTTTTTCTTGCATACTTTAATGGCTTAGGAGTGGAGTATTTTAATTTTTAATTTTTTTTCTTTCATGATTTTTTTGGGTAAACAATACAAGCAAGTAACCCAACTATGCTTAAGTTTTTTGTTTGATAACCCAATTTTTAAAACTTTCAAAATGGGTACTGAACTAATTTGGTTTGTTTATTTTGTTAAGTGCTATTAAGCATTAGATGGGGCCTGATGTGATAGTTCAAAAATTGGTATAAT…
>GbNAC176
AAGCCTCTCAATTTCAAGTCAACTTTTGAATTTAAATTATGAAAGTATTATAAAGATTCTTGAACATTTTGTTCTATCTACTGACAAAATTGACAAATTAGTCTCTGTGCGTTAGACTAAAGAGCAGATTAGTTTTTCTTTTAAAATTTTTTATTTATTCCTACAGTTAAAAAACCAATCTACATATGACAAAACTAGGTACACATGATATACCATAAGTAACTATAGAATTATTTTGTCGCTTAAATTAATTATTAACATAAACTAATTAATTTTTTATCTAAAAAACAAAAACTAATTTACTCATAATTTAAATAAACAAAATATAATTTAACTCTTACAATATTACCAAATTAATCAGATAATCTGAGTTTTGAGTAAGTTTACCATTTGCGATCC…
>GbNAC177
GAGGGAGCGATTTCTATCCATGTAGGCAAAATGCTTCCTTAGGGACGCGTTTTTCTGCCACGTCCCCTGACATCGCGCTGACGTGGACGCGCTTTCGGGAAATTAGACCATTCCGGTAAATAATTATATACCGGGCCCATTTCGGTAATTTTTTTTAAAAAAAGAGCTTTTATATGTAATTTGCTCGATTTATTGCGTGTTTTGGTTTGTTATTTTCATCTTTTTATATAAAATTTAATATGTTAAAAATTTAGGGTCTGTTTGATTGAAGGAATTGATTTTCTGGAAAATCATTTCCAACTTTTCCAGCATTTGATTGGCGGAAAACATTTTCCATTTGGAAAATGAACTCCAAAATAAGGGAAAATGAGTTACATTTTAGGGAAAATGTCTTACCCT…
>GbNAC178
TTTGCTTGATAATTCATTAAAAATTAAATCAATTAAAAATAATATTTTCAGTTTTTTTAAACCGGCTCAGTGAGTTCTTTCTTCCGTGATTAACTGTTGGCGCCAGTCCTACTACATTACATTTTGTCTCTATGGACCAAGGAGAAAGGGGGCTGAGCAGGAATAGGATTGTACCATGAGAGAAGCAAGGAGGTCAACCTCTTTCAAATATACAACATGGATTCTGGCAATGCAATGGAGTTAGGCTTTCATGTAGATCCGAATAAATCATCTTTTCCACGGAGGTAAATCATTGCCCGCTAAGCAAGAGGATAGCAAGTTACAAATTCTGTTTCGGTAGGACATGTATTTCTATTACTATGAAATTAATAAATGAAGTAATTAATCGTGGGGTTACCA…
>GbNAC179
CCAATTGATCTGTCAGCTTTCTATGCTTTCACGACCTAGAAAATGGAGTTCTCTCATCACTCTCCGTTGGTTGATTCATGGATCCAATACATTCGCGGTTATTTTTTTTAAAGGTTTAGATTAGATAATTCAATGACTACTATGTGTGCCGACAATATGCTCCAATGATTGTGAATTTTTTCGTCCTTTACTTTGTGTCGGAGTTACAAAAGGATTAGAAGAATTAGTCATTAAGATTGCAAAAATATGGACATGTTTTAATTTTATTGGTTCGACCCATATCCTATGTGATCCAAAGGGTCAATCTAATAATTTTTCACAAAACAGTTATTTGCCTATTTAATGCCATATATTTACTTATCCCATACAATATTTACCATAAGTTTTTCTAATATTTAT…
>GbNAC180
TTTAAAATGTAGACGTGTGTTTAAACGTAAAATACAATAAACAATGAAAAGTATAGTTTGAAACAAATTAATTATAATAACATATGAAATATGTACGATATTAAAATAAAAAATAGATTAAATTACGAGTAAAACAAAATTTAAACATATAAATACATAAGATAAACAATACTAAATGCATTGCATTATTTATCATGGTTTTGTCATCAATTATGAGTTAGTGTCGAGTTAACTTGTAACACCAACTCAGTGAACAACATTATTAATATATACAACTGATGGAGATAATAATTTATGTATATCGAAACAAATATGTTTAAAAATACATTAAAATTAAGCTTTGGTTGAGTGGTGAATTTAAAGTTTTCTTAATTTAATTAGTGCAAGTTCAAATCTCAC…
>GbNAC181
CACTTATTGGTATTAAAATAATTTAATTTATAACAATGTATCAAAGTTTGATTCACAAATAATGTGTAGAATTATACACCGTCGCCAATGTATCAAATATAAATTTATATATATTATTTATAGGAATAGTATTTGGTACACTGCTAAGAGAGTGTGTAGACTCTACAAACAGGATCAGGGGTTCATAAGTTTCATATTGGGATATAGTAAAATATTAAAATAATAAAAAAATAATTTTTAAAGCTGCGGATAAAATAAAAAAAAGTACATGTACCAAATATTAACCCTTATTTATAATAATTGACTATAATAAAGCATTCAAGATTAAAAATAAATCTTTAGTGTATAAGTTTATACACCAAAAGATGAACTATATGCTAACATATTCTTAAAACCTTT…
>GbNAC182
ATTGAAGTACTAAACTAATTATTGAAACTAAAATCAAATACTAAATTAAAATAAAAAATTAAATATCAAAGAAAAATTCAAAAACATGGTATAAATTGAAAAGCATGAATTGAAATCATAGTTGAGGCGGTGTGACAGAAAACAACATGCTTTTAAGTGAAAGGAGTAGAAGAAGAGGGCGGTTTCGGCACTTGCTCAGCAACTTCCTTTATCCTTATCCACGTGACCGTTGACACGTCAACCTTTGAATTTATGTCGTTGAGTTTTTGAAATTTAGGTCTCCCCCCACTATTTTATTATAACTTCAATAATAACATGTTAGATTTCTTGTATATGTGTTGGATAAAATTGAAAAATGTAAATACTAAAATGGGGTTATTCTTGTTATTTTACCATTAT…
>GbNAC183
TTTTCTATTTAACTTTTTTGTCTGTTTTACCCCTCGAACTTGCATTGTTTGTCAAATCACCTCAAAATAGATAGAGAAATTAACGTCTATTATCTTAATTTACTGACGCAATATACACGTGAATTGCCACAATAATGTCACATTAGCAATTTATTAATTTTTAAAATTAAAAAAATATTTTAAAATATTAAAATTATAAAAAAAATTATTTTTAATTTTAAAAACTTAATTAAATTGCTTACGTGGCATACACGTGGACTGCTATATCAGCAACATTAATAGACATTAACTTTTTCATCCCTTTTAAAAATTTAAAAGATAAAAAAAATTAAATAGAAATTAAAATATAATGTTGAAGGATTAAATAAATTATTATGCCTTTTAATAATAATTAAAAAG…
>GbNAC184
GCAGCCAAGCGAGATCTCAGCTACAGTCATTGACTTAAAGTAAAGAGCATTGTTAAACCCTAAACTCACTCAAATTAACTTGCATGAATGGATATCACATAATTTCTTTCAAGCTTCTTCTCATGGGATATGTAATATATAGTGTGTATATATCCAAGTTCCAACCTAACACATAGTAGCCCATTATATCCCAGCACCATTTATAGCATTAACTATAACTAAATTGTTTATGGAGAAGGAATACAAGAAAGAAACTAATTGGACAAGGAAACCCCAACCTCTTGTTTGTTTGCAGAAGAAACCAAAAAAAGATTTTAGATGGTTGAAGAAGTTGTAATTAGTGTAGTACTAAACATGGGTTAGAGCTAGATTGATTGTGCATCCGTAATTTTCAACTGT…
>GbNAC185
TAAAATGGAATTATAAAAAAATATAATTAATTCTAAAATTAAATAGTAATATCTAAGCCGATTGAATTTTAGCTCGATTGACATGAATATTATTACTAATGTAAGAGCATGTGAAAAGCCAGGTACTATATAACAGATACAAGAATACCTTAGTCATAAAAAAAATCATAATATTAGGGTGCTAATATGTCAATCATCAAGCACACCAGTTGTCGAAAAATTAAAGCCTTCACATAAAAAAATCCCTAAAGAGCATGCAGCTTGTAATATGATATAAATTAATATCATATTTAGTACTCAACAATTATATCTTTTATCAATTTGATATTTATTTTTTTTAGTTAAATTTGGCTCTAACCTTTAGAACAAAAGTCATATTTGATCACCAATTGTTCAAAA…
>GbNAC186
GGTGACATTCAAATATACATCCAACTACTGTTGTCAAAATTACTCCATCAAAATAAACGCATGTGAAGAATTAATTATCCTGCTTTAATACTAAATCTGTAAAAATAATTAAATTTCTCAACATGCAATTTCAAAAAAAATTACTATAAAAATAAATAATTAAAATTACAAATCAAAGTAATAAATAACACAATACCACAAATCCAAACAAATATTAAATTTTTTCCATAAAAAATATTTACAAATGTACCTTCAAGCTAAATAAAACTACAAAATCAAACAAATATTTAGTACTAAAAAGAATTAATTACAAAAAATATTAACAAATAACTACAAAAATCAATTTACCTTTAAATAACAATTTAGGTGCTGCTTCCTCTCCTCCTTGAACAAAAAAAA…
>GbNAC187
AAATTGAAAATTGGATCGATAGATTTAGCGATTTTATTAGTGTCATATAATATAATTGAAGCAATAATAAACTATTTAAATTATTGGAACATTTTTAAAATGTAAAATATGTTCTGATAGTTATAATTGAAAAGATACCTGTAATTCAAAAGTTACCTCACTTGTTTATTAATCAAGAATTATCACTATTCATAATGATGAGCTACATATTTTATTACTAAAAGTTATGTTATTTGATTATTAACAAAAAAAATTAAGATTATTCAAGTAATATATAATGAAAAATTTTGTTTATTTTTAATAGATGTGACTATTCAAATAAGATCTATTGAATAGTTATATCTCTTATCAAGAATAGGAGTGAAATTTCATTTATTGCTCAAAAAATAATTGATGGAA…
>GbNAC188
TATAGTTTTTTAAGTTTATTGTTTTTAAAAAAATAAAAAAAAATGAAAAGGGTTTATTTTTGCTATTCTTATATTTTTTAAGAGTTGTTTAAGTTTAATTTCAAAAGGGGACAGACCTAACATGCAAATAGACCAAAAGTTTAAAATTATTTAATTTGGTGTGGATGGCACGTTTTTTATCCAATCTAAAAAGGGTAATTACTTCATCAAGTCTCTGAACATTTTATATAATCACACTTCAGTTTAATACTGTCAATAGCAATAACAGCACTCAAAAAATGCATTTTTTTTAAATCAGCCAATGATTGGCCTATAATGAAGGGTGGTGCCGCCAATAGTAACAATGATACCAAGATTCGCTGTTCAAAATGAGTCATTTTCATACATAATTTACAAGTG…
>GbNAC189
AAAAACTAAATTGCGGAAGAGAGCTTTCGATTGGTGAAGACAGTGCGAACAGAGAAGGTCATACAACAATGATTTAACAGCCTAGTGATTTAAATGAAAACTTTCGAATAGTTTAATCACTATTTTGTAACTTTTTAAAGTCGAGTAACCAAAACGTAAACATACTAATAATTTAGTGACCTCAGATGTAGTTTACCGAACTATCAAAATTCAAAGACCAAATTTAAAAAAAATATCAAATTCAGGGACTAAATATTATTTTATCTAATAATATAAGAGCTAACGTAAAACTCATAAAAAATCTTTTGGATCAAAGCGAATAAGATTATAATAATACTTCCTTGATTACCGATGCTCACAATATTTAATTCAATCATTAATTACTAAACCTTGATATTT…
>GbNAC190
TGAACTTGATCGAAACTGCAAAAATAAGATGAAAAGAAACTCGATTTAATTCAAAAATATCATTTTTTTTTAGTTTTGAGTTAATTAAATTGAATTATTTAAGTTATACTTTTTTCGAATTGACTCAAACAAATAATTCGATTTTTCGAGTTCGACTCAAGTTGAATTTTACAACTTGAGTAATTTGAATAACTCAAATAAAAAATCGATGTAAATATCCATTGGGCCGCTAATAGTTTTGAAAATGTGCATATTGATCCCTCTAAAAGAATACAAAATAATCTATTCAAAGTTCAACTAACGAAATTTTACTCGATTCAATCGAACGCTCACCCATTTACAAAATAATCAGCTTAACATCGGAACCAGGATTTAATGAAATTGTGAATGTGACAGGGA…
>GbNAC191
TATTTGTACCAGTTTTGGATAATTAAAACTTGCACTAATCCCATGATCATCATACTTACATTCAGCAAAAAATTATCACTTGTAATATATATTTCTTTTTCTACGACGCATTAATACATTCTTCTAGACTATTTTACCAACTGTAGACCTCGAAAGCATGCGTGTTCCATTAAGTTTCCTTATCACAAAATAGGATCTCTCGCCACAATGAACACTTGTTCAGCCATTTCATGAGTTTACAATGGAGATGACATAATGGGTTTATCACGTGCTTTTAATTTCACTGCATGTCGGCCTGTGTTCGTGCACCTTATTGCTGTAATAACAAGATAAGAATGAAATACTATGTCAGGTGCTTTTATCTTCTTCTTCTCTTTATTTTTTCCATTAACACAGCAG…
>GbNAC192
GGCCTTTGCATCTCTTTCCCAGCGTTGTTCAGGGGTCAATCCATCGTCCTTGGATTTTCAATCTACAAAAGATCCAACTTCTTGCTTTTTCTATGTTTGTGCTCAATCAAATTCCATGTTTTAGTGAATTTAAGAGAAGATTGGGTGATACTTTTATGGTTTCACAATATATATTCAGTTTTCATTCATTTGAAATCTTTTTTTAATCTCTTGATCGCTATTATGATGATCATCATCGTTTGATTTTGATTTCTTCTTCTCTCTCCATGTATAATATTTTTCCTTGGAAAAGCTTAGATGAAATGAAACTGCAAAGGAAAAAATAATTGATTCTTTTAACCATGGCTTAAGAGATAATGACATATATAATGCTGACATGGAAGTTCATTCTTTTAAGAA…
>GbNAC193
TTGAGTTTTCGAATTCGAATATCAAACTATAATATTTTACATTTTTACCCCAAACTCCCAAACCTCTTTACTTTTCCCTCAAAACTTTTACTCATTCCCACTCTCCCCCCAAAACTTTTACTCCTCTCCCCTCCCAACCCCCCAATCTACCCAAAATCTATTTTCCACCGAAATTTTACTCTCCCATTTATTTTTTCTCAAAATTTTACTCCCAAAAACCCTCAAAACCTTTTATTTTCCCCCAAAATTTTTACTCCTCCCACTTTTCCCCTAAAACTTTTATTCCCTTCCCATCTCACCTCCCATCTATCCCAAACCCTCCCCCCTCCAATTTTTTTTTAATATTTTCCCTCCAAAATTTTACTCCACCCTATCTACTTTCCCTCAAACTTTTATTCC…
>GbNAC194
CATTTTGACAAAATGAACTTTGTTTTATAACTTTTATATATTATTAGACAATATTTTTAAGAACTTTTTAAATTATTTCCACTATTTTAAATATAAAAAAATTTATTTTTATATCATAAAAAACAAATATAGAATTTGGTTCACTTTTGAGTAATCACAATTTTTAAACTTGCATTCCCTAAACCATTTAAATACCTCAGTTCGGTTCAATTTTCAATTTTTTTTACTCAGCTCTAATGAACAAGTTTAAACAAACTTGAGTTAATTATTTACAAATATAGACGAATTTAGACAAAATTTAAGCTTATACTTTAAGTCAAACTGAGCTTAAGCAGTTATATGTGATAGTGATATCATGTATGAATTTAACTTGAACCCTAAATTTTAAACTTACTATCG…
>GbNAC195
ACATGGCCAATAAACACGCCATCTTTTCAACCTAATCGTCTACAAGTTAATACGGAAGGTGATGATAGGTTTTACGTTACAAACATAATTTTAAGATTTAGGTACCAATTATCTAATCATAACCGTATCATTTTTTCGTTAACAGTTATATATATATAACAAATCATTATAATATAATTAGAGCTAACAAACAAATTTCTATTCATGTTCGTTTATTTTTAAGTTTATTTGTGTTCAGTTTGTGTTCGTTAAGAATTTTAATTTTTTTTGTTTATGTTTATTTATTTAAAATTATGTGTGTTCATGTTTGTTTGTTTAATGTTCACGAACATGTTCATTTAACTTAATCAAACATATAATTGAACATGTTCACAAGCAATGTTAATAAATAACAAACAA…
>GbNAC196
AATCAATTGAATAAATTATTGAAAATCATAAATTTTAAAAATATCATAAAATAAAGAAAAGAGTTCAACTAATATTTTAACTCAGTTCAACTGATTTGTATCAACCCGCATATCAACAAGTTCAACCATTTTTTCAAACCGGTAACACGACTTATTCTAAATCTAGTGAATCTAATTTTGTAAACTTTGTTTTTTTTTTGTAAGTTTGTGTTTATGTTATATACTAATTTATTTAATGTGGTATTAATTTTAAAATATTGATCGCTTATTTAAAAGAGTCATAACATCATATAAATATATATATATCATTTCATGTTATTTTTATCTTATATCGTAATCTTTTTTATGTTCTATTAATATCATATTTTTGCATATATAAATTGTCACCGTGGAATTGTG…
>GbNAC197
TATTTTAATTAATCATGCTTAAATATGTTTATAGATTAAATCTGACCAATTTGGAGATTTAAGTCCGACTTATATAGGCCTTATCTAACTACCAGTTTTCTTTCCATCCAATAATTAATCTGCAAAAATTCTCCCATTTTCTTTTCCTTTTCCTTTTATTCGGTATCTAGTGGACCAATGAATGCCACACATATATACAGGATGTGCTGAGCAAGTATATATATATACAGAAGTATATTACAACTGTTTTTTTTTTTAAATATGAGTATATAATAAAATTATATATATAATCAGGGATGTTATTGAGAGGAAGACAAGATTTGAACTCTCAAATTTTTAAGATTTTTTTTTAATCAATCAAAATTTGAGAAGGATGGGTCTAAGTAAGGCTAGGTAAAC…
>GbNAC198
AATGTTGTTCTTATCTTTTAGATCTACCCACTTTGAGCTCTGAACTGGCTTTGCTGGCTAAATGTACCTGGATTTTATGGATTTTAAGATATATTGACATCAATTTTCATTTATTATTTTGCTTTTCTTTAGATGAATTGCTCTGCACATTTTATGCTGGGAATGAAACTTCCCTTTCCAGGATATCTATTTGAAATCTAGTAGCAGTTTTTACAAGTTTTAAGGTCCTGCGATGAGATGGAGAAGCTGATGATTAAACCTATAATAAAATTCAACTAGTACAAAGTTGACCAAAAGTGTTTCCTTGGTGACCAAGTGTATTGATAATTCCTTGGCTTGATCTCTGAGTCAAGCACTTTGGGAAGGGGTCAACGTCAAGTTCAAGTTCCTAGCAAATGC…
>GbNAC199
TAAAAAATAAATAATTTAAAATATTTAATTTTACTTGAAGTTAAATATAATTTTTTTATGTAAAAAGTCAAATATATTTAATATGTAATTAAATTTTCATAATTTTGTAATTAAAAATAAATAAATGAATAAACAAAAAAAGTATATATTATACTTTTTATTTAAATTTTTTTTAGTAAATTTATGTCAACAAAGTTAGAGTAAGTGAGAATTCTTGATACTTTACGAAGATAAATCATTGAAAATTTCATTTTATTAAAAATGGAAAATTTTAATATTTAATATTTTAAATGTATTTGATAATCATTTTAGTATTTTACTTAATATGAAATTTTCAGTAAAAAAATATTGAATAAGATAAGTAGGCGAATAGCTACTTAATTATCACTTTATGTAGAA…
>GbNAC200
ATATTATATTATTTTAATATTTAATAATTTTATATATTTTTTATTTATTGAAATCTTTTATATAGTCATCTTAACATTAATTTATTATTTACATTAGAGTAATATTATATATTTTGTATAGATTTATTTTTTTAAAGTATTATAAATTACATAATATATAAAAATAACATAATATAAAGTATTATAAAATTAAAAATAGGCTGGTTAGGCTAGGCTTAGGCATTGAATATTCAAGCCTAAGCCCGACCCCTATTTTAAACGAGACTAATTCTCTTATCTAATCTCATTTTTTAAGTGTAATATTTTTATCCAAACCATCTCAAATTTCAAATGGACCTCCGGACGAATAGCCAGCTTATTTCCCCTAAAAGTTGGAGCAGTAAACAAAGGTAAATTAGT…
>GbNAC201
AAAAACTTGGCACCATACAGCATCTTGATTAGTATGTAAGCGCCAACCAGCCTTGGCAAGCATGGCTAGATTATTTAGTCTAGCCTTCCGTAATCCAAGACCTCCTTGACTCTTGAAACGGCAAACTTGGTTCCACTTCACTAGATGGTTGTGAACCGACTCAGTAGAGCCTCCCCATTCCCCATAAGAAATTCCCATTAAGGCGCTCCAACTGGTCACAAGTTGCAATTGGCAGAAGAGTAAATTGCATTGCATAAAGAGGGATGGCACAAGTGGTAGACTGAATTAACACTTTCCGCCCTGCCGGTAATAGTACATTGCTTTTCACCAGACAAGGAGCTAAGGTTTAAAGCTTCAACTCCATTTATATTAGGCGAACCTTTCACCAGATCCTTCCAT…
>GbNAC202
CATGCCCATTAGATTATTTACCAAAATGGTATGGTTTTATTGGTGCCACCTGTCAAATTGGAGACACTAGACTGAAATGTAATGACCTAAAGTATTCAAGGACTTGATATGCAAATTTTCCATTTTGAGTGGTTGTTGAAAAAAAGTGAAAGGGTGCCACCTGATAGTGTGGCGACACCAAACCTTAAATGTGATTAATTGCTTTATAAGCCTTTCTTATTTTTATTTTATTTTTATTCCCCTTCAACTCACTATATTGTGTTTCAACAAGCCCTTAACCTATTTTTGTAGTTATATAAGCCCTTAACTTATGATTTTTACTCATAAAAGCCCTTTATTTTAATATTAAAGTAAATATATTTTGAATTTCAAGCTCTTATCTTAATTTTTTGTTGATGC…
>GbNAC203
AGAATTTCACCCTTGTAGAAATTTTAATTTTCTACCCTATAAAAACTTAAGATTATTAACCTAAAAATGAGCAATTCATTGTTAAAAGAGAAATGAAATTCACTTTTTTTTATTTGTGTTGTTACTTGTCTTGTCATCTCACGTTAATAGCAAACATAATGCCTTTTTGTTAATCGGAAGAGTGATGTGGCCAAAAAGAAAAAAAGGTGCTCTAAATCAAACATAGAACATGAGATTAATTGAGGGAGGTGATGAATTAGATTCCCCTATACGGAGCAACTCTCATGTGGGTTGTGGTCAAATTTTACGTCTTCATAATGATGACCATTCTCTTTCATTATTATTAGATTAATTTATGACCAGTGGTTATACTTTTTGAGACTAATCAAATTAAAGATT…
>GbNAC204
GTTGATACCATGCCTACAATTGAAAAAAGAGCATGCAACTGGCGATTTTAACTTTTTCTGGTTTCATCGTCTGACACATTTCTCGGTATAATTTGCCAGCACTGTTGATCCTCAATTGGGTCGTCTCGCTTCTTTTAAGTCGAATAGTAGTAATAGTCACCATACCAGATTTCGAGATTTATCTGGAATAACTAGACCCCCGATCAACTTCAAGATAAATGCGCGCGCGAATTGTACTTTTTCAATGTCAATCGCGAAGGCCTCTATATGTTTGAAGTTGTCCTCTAACCATCCCATCTCGATCCGAATACCCCTAAACTTGTTTGACACCTTCCCTAGTAGTTGCTTGCATGTTACACTCCAATCGACACTCGGCACTAGCCCTGTAATGACTTCCCC…
>GbNAC205
GTCAAAAAATGGAGGAAACCACCTAACCGGATTGTTAAGATTAATTTCGATGGAGCTTATGACGGCAGACAAAATAGATCGGCAGTGGGTATAGTTGCCAGAGATAGAGAGGGTACAGTTCTTCTTTCATGTGCGGAGACCCATCACCGAATAACATTAGTTGTTGAAGCGGAGGCAGTCGCATGTCGGAAAGCCATCCAAACCGCCATTGACATGAAATGGGAAAGTATTATTATAGAAGGAGACTCCTTATCAATTATAAGAAAATGCAAGGAAAAAAGTCCAGATAAATCTTTGGTAAGTGCGTATATCTATGATATTCATCAACTACGGCTAAAACTAAAAGATTGCAGTTTTGAATATATCCCGAGAACAGCTAATAGCCTTGCAAATATCCTA…
>GbNAC206
TGTCGCCTTGTAAATTCTCGTAAAGTTAATTTCTTAGCTTTAACAATCACACGATGCTGGTCTTCCGTCAGATCTCTGAGGATTAGCCAGTTTTGAGTTGGTTTAGGGTATTGGGGGGGTGCTGTACACACAATATTAGCAAGCTTGTGTCATCGTGAGCTTCTCTTCCTCTTTCGTCCTTTGTTGTTTCCTTTTTAGTTTATCTAGAAAAGAGTGGAAGATACTTTTGGTATATAAGCTAAGCAAGCAATGAAATTATATAAGATATGATGTGTTTCACTATTTCATTCACCCCTTCTTCAAGATTTGCCTTTTAGCTCAAGTGGCTTCAGTTCGATCTCGATGATATTTTTTTGTTTCCCTTGTATAAACTTGTTTCATAGATCCCTAGTCTGTTTA…
>GbNAC207
CAGTTTATTCATATTCTTTAAAAAATATTTGAAAATAGGTGTAATTTTTAATGATATAATATGTTATTTAACACGTCACGTCAATAATTTATGCGAAAATGATGATAATCATTGTCAACCATTATAAAAAATATATATAATGATGATAATAATCATGGCATGACACTTGGATTTTATTGGCATATATTTTATAATTATATTTTCATTCATTATTATCTATACCTTATACTAAAAAGAATTCCTGATAGGTCGGTGGCGGGCTACAAATTTTTAATGTTATTTTAATTTATTTTATATTTAGTTTTGATTTTTTAAAAATTCGTATTTTTTTAGTTTATATGGAATATTGAATATTCCATTCCTAATTTGTATTTACTTTGGTATCGTCTTAATAATAAT…
>GbNAC208
CATTGTTAATTTGGAAGGTTACCTTTGAATATTGATTGGTTCAGCTTAACTGTTTTGCAGACGGAACAAAACCTACATGAGTGAAGCTCAAAGAAGTGCACTCAATGCTCTTCTTTTCCGAACAGGTGACCAGTCCAAGGACATAGTCCTTGCTCTTGCTACAAACCGTCCTGGTGATCTTGATTCAGCTGTGGCTGATCGCATTGATGAAGTACTGGAATTCCCTTTGCCCAGGGAAGATGAACGCTTCAAACTCCTAAAGCTCTATCTAGACAAGTACATAGCTCAGGCCGGTTCAAGAAAACCCGGTTTGCTTCAAAATCTTTTCAAAAAGCAGCAGCAAAAGATCGAGATCAAAGGACTGACCGACGATATCTTAAGGGAAGCTGCAGCGAAGAC…
>GbNAC209
TCCATCTAAATTTATTCTAATTTGAATTTGGATATATTTTAATTTTTAAACCCTTATAATTGTAATTGTAAACAGTATGTATATCAATACATATATGTATATATTATGGCCGTCCAAGTCGAATAAGATGCGAAAATCCCAAGAAGTAATAGCAGCTGTTTTTCTCCAAGCCTTGCTTTAGGAACAATCAAAATGAAACTCTTTATTTTCTCGGGATTGTTTGCTGTCATTTTTATTTATGATTTTTGAATGAATTAATTTGCTTCTTTGAACGTAGCGCTTGTCCCAAGTTTCTCTGCAGCGCGTGCAAACTTGTAATATTCAACGTAACAAGTTATAATAAACCTAATTTCTTCCTAATCAGTTTTATCTCGATTATTATGGGTATTGTTATTAATG…
>GbNAC210
TAAATGTTAGTGTAAATCCTACAAGTCAATCATGATTAGCTTGTAATCACTATTTTTTGTTATAAAGTATAAATTTGAGAAATTTATTTATCCGTGAGTAAAATGTTAAAGTTAGTGATGTTTGGAACTTGTTTAGATAAAATCCTAGAACACATATGATATTGTATAAGGAGTTACAATTATGAGATTCTTATGCATCAAAGTTGTGATTCTTAAAATGTTCTTGATCATCGTATTATCAAGATAAGACATCAATAATGCTCAGAGGTCGACATGTGTTAACCCTCCATACATGGGGATGTATGCAACTCATCTTATAAGTTGAAGCATGGGATACTTAAGCATAACATGTCGGTCTTCGTTATGAGAACAAGCACGCTAAACATGACCTGCTATAAG…
>GbNAC211
TGCTCAGGTCAGGTATAGGTGAACTGTACGTGTTATGTGAATTAAATAAATAAATTAATATAATTTTATCAATAAAGAGAGAATTATTAATTAAATTAATATAAGTTTAATAGTAATCAATTGACAGTTGTGCTGGTTTTACTCATTTTTATGAGGCGATTTTGAGGAATAAGGTCCCCCGTTCAACGACATATGCCCCAACCCTCTATTCCATACTTCATAGCTTGAATTAATATACATGATTTTGGTTTAATTGGGGTCTCAGTCCCTGTATTTTTTTTATATATATTTTAGACTTTTATAGTGGAAGTCACTCTAAGGGCTTCAGTTAAATTGGATTAAGTACAAAGGCTAAATAAGCAAAAAAGAATTATTGAATATTTCTCACTTGGAGATTGA…
>GbNAC212
TTTTTTGTTTCAGCTGGACAGAGTTCGTGTTTATAACACGAGTGGTGCCGCCAACAGGGTTCCCTTGTTTGGTGCCGCCAACAGTGTTCCCTTGTCCCAGGGGGTTGTCAAATCAGTCTAGGTTTTTTTTCTGTTTTTTTTTTGTTTTTTTATATATTTTGGTAAATAAAAAAATTATATATATTTTGGTAAATAAAAAAATTTTATAACATTTTGGTAATTTTTTATTTTTTATATTATTTTTGTAAAAAACCCAATATTCACCCTTTCTTAAAAACATTAGTGTTTTGACGGTATAGGTGTTAACAATTTAAATTAACTAATGAGATTTTAAAAATAGCGGGATGAAATTATACCAACTTAAAACATAAAAGCTGAATGTTATGTAGGGGGATCGAA…
>GbNAC213
TATTTAATTATGTGTATGTAAAGTTATTGATATTTTACCAATGACGAGGTATTGTGTTATTGTTCATTGACAGTATATGAGACTCATACATCGGCACTATATCAAATATTCACCCTTTCTTAAAAACTGTAACGTTTTAATCAGAATAAGTGTAAGTGGTTTAAATTAAGTAATAAAATTATAAAAATAAAATTATGGCAACTTAAAATATAAAAGTTGAATGTAAAGTAGAGGGACCGGAATCATAATTTGATAAAATATAAAACATAATCTTTTCTAGAAGTCGAAAAGTGACACTAAAACTGATGGAACCAGTTTGGACACTTCCCGTGGGCCATAATATCATCAATACAATTAAGAAGAAGAAAAAGAAAAGACTGTTTCTAAGGTGATTGGGCA…
>GbNAC214
AATTTCTTTTTCTTAGTCTAAGAAGCATATTCTATATTGTGGAATAACTTGTAAGAATATATATGGAATTGGATATATTGATTATTTTTTTGTTTTATTTATATATGACATTTTCAAGGTCATGGTAAGATTTTGATTTGTTTAATTAAATTTATATTTGACTGAGCACTGTGGTCTAAATTTGGTTTTTCATGCTTTTAACATTTTGTTAAGTTAATTAAATTAGACTGGAAAAATATGTATATAGCGACATTTTAAGCAAAATGCCACCAGTTTTTAGAATTAGCAACGTTTGTCAAGAAAATGCCACTACATGTCACTTTTAACGGGCAAACGCTGGTAAACGTTAATATTTACTGACGCTTTGGGAAAAACGCCACACAGTGGTGTTTGACAAGA…
>GbNAC215
ATAAAATATCAATCCTATTTGTAGAATCTAAAAGATCATTTTTGTCGAAAACAACTTAAACTTTTTAAGTAATTGGTACATTTCCTAACAAAAGGCCGACGTCTAAGGTTTAATTTTTGTCTTTGATTTAATGAGGGTATTGTTTTGTATTATAAATTTTTGTTTCAGAAACAAATAGTAAAAAATTAGGTAAAAATATCATAGAAACTCTTATATTAAGAATTGAATAATAGTTTGCCCCTCTACTCAAAAAATAGGCAAATGAGTCCCTCTATGTTAGACCAAACAACAAATTAGTCCTTTTATTAAAAAATTCATCTATTTCTACTATTAAAATCTAAGCCCTGTACATCAGAATGAGGAACATGTGATACACCATAAGTAACTATCTGGTTATTT…
>GbNAC216
AAAGATTAAAAATGAGTTATTGGGTTTTGTAATTAATATGTTTTTTTTAACATTAATATTATTATATGTTTTTATTATATCTAAATTTTTATTCAATGTCTAAAACTATTCATAGTCCATTCCTAATGCTTAAATAGGAGGATAATGTGCTTCAGCACACTTGAACCTATGTCCTCCTGGATTAACAACAATGTTTAAATAGGAGGATAATGTGCTTCAGCACACTTGAACCTATGTCCTCCTGGATTAACAACAATGTCAATACCAGATCCATTCTTGACATTTTGAGGCCTTAGGCGAAACAATAAATTGGGTTCCTTTTAAAACAAATTATAAAATGTAATACAATAAAAGTTGAAAAATTTTTGAGGCCTTAAAAGATGAAGCATTTAAAGTCAA…
>GbNAC217
ATTTGTAGCATTATGTATTTAACTGCAGGCCTGTAATATCATGGGCCCCCAAGTCTCTCAACACCCATCTTTCTTACATTATATTGGCATCCGGTTTAACGCATAACCAATGAAAAATGAAAAAAATAAAAACAATGAAAATCGCCGTTGCCGGGGATCGAACCCGGGTCACCCGCGTGACAGGCGGGAATACTCACCACTATACTACAACGACTAGATGCTTAATGATCAAGTTTTATTAAATTTCATATATTTGTCAGATAAAATGTCCTTTTTCAAAAAATTATATGTTATTATATACTGTTATTCCCTAATTATGTGAGGTTGAGTTAGCGTTTTTCAAATATAAAAATTAAAAATGACATTTTTATTTATGATTGAAAGTAAATATTTACAACA…
>GbNAC218
CAAATGAGATGAAAAGAAGGAAAAGGTCTAAACAAAAAATGGTTCAACCTTAGATACAGTCGTGTGGGTTGGTGACCCTTTTAACCACTCTTAATTATCTTTTTCCCTGCATTGGTCTATTCACCCCATTAAATTAAATTAAATTAAATTTTATGTGCAGCCATGGTAGTGTCCATTGTCAAATATTCTATGTCATCCCCCCTATTCTTACCAAAAAAATAACTTCTTTTTCTCACTATAAATCAACAGCTCATTCACATACATAATTAAATGTGTATTTGATTATTAATAATGACTTTTCATTATCAAGGTATTTAATATTGATTTGATGGATAAGTCTACGTTTACAACTTTTAGAAACTATGTAGATAGTAGACAATATCGCCCTTTCTATTCACA…
>GbNAC219
AATTTTTTGGGGAATTTAATTAAAATTTTTAAATTTTATATATTTAATGAAAATTTTCAAAAATTATAGAAGAGCTTAGTTCAAGTGTTTAAAATTTTCAATAGACTTAATGTGAATTTTTAATTTTTTTTAAAAACCTAATTAATTTTTTTAATTCAAAAAACTAATACAAATTTTCAAAAATTGAGGTTGAAGCAATGTCTTAAAAATTAAACTAATCATATTATCATTTTTCGATTCAAACAGTTTTATTGGTTAAACCGTCGATCCAATAATAATTAAATAAAAAATTAAAAAAATTAATTCAAATGATTCAACATAGATGGTCAATTTTTTTTTTACTAATTTCGAACTATTTACTTAAAAACAAATTCCATCCTTTTTATCGAAATTGATATA…
>GbNAC220
GTGTGGTAGATGGATTTACTCGCCCCTTGTAGAATAAATCGCAAAGTTGTCGCATTCTTCTTTGTATTCTCCTTCAATTGCTTCTTCAGTTCTTCTACATCCGATTTGGACTCGACTTCATATCCTTGCTCCACCAAGTCCCACAATGCCTCCTTAATATCAAATCAATTCCTTAGTTAAATATAATCTTTGGTCTTCTATCCTCTGTTTTCTCCAACAACACCCACACTAGAATTTGGATTGACAAGATTATCGACCAAAGGAGTATGTCCTGTATCAAAGATGGTAGAATCTCTCGAGTTCGCCCAGGAGTAGAAAAATCACTAGTATCAATGAATGACAAAGGAGCCTGTGAAGTGCCAGGAAAGAGAAAACCATTAATAGCCTCCTTCATATTTA…
>GbNAC221
GACAACATATGCAAGGTAATTAAATATTCAGAAGAAGCTGTTTTTCATGATTGTTTACTTATCATCAATGCAAGAAGTAAATGCAAATCCGTTATTATGTATTTGGTTTTAGGCGGATCTTGAGGAAGTAAGCAAGCTATACATAGATGCCAAGTCTTCGGCAAAAATTCTTCAAGAGCAACAGGAAAAATTCATTTCATGATAATCCTATTTTTATATCTTCTTTCCTCTTGCCCTGCAGTTTTAGGTTGAATTTTGTTGTGCATTGTTTTCTCTCAGTTGGACAATTGATCATTAGTATGTGCAATGCAAGATGATTAAATGATTTATTGTTGATTTGCTTTAAGTCATCTAGGGTTCTTTGAACAACCTCATGTCTCAGGCCAGGTAAATCGCATA…
>GbNAC222
ATTACTCCTAAATGTCCAAAAATACAGCAAGTAATTTGCCTTAAGTAGACTCTCGAGCATTTTTCAACATTTCTTTTCAACAAAAAATAATTTCGCTAATAAACCCATACAATCATGCTTTCTTAGATGATGCACGTTCCAACTCCACAAGTTTTATTATTTTTATTATTATTATAATATCATCATTGTAAAAAGCTTTTATACCTAATAACTTGCCAACAACCTATGTATCCTCTGCTTCTTTGCATAAGGCCTTGTATCGATTTTGGAACTCGCCACCTCACAAGGATTCTGATACAATTTCAGGAGCAGCTTCGGATTGCTTAACAAGTTGCAAATATGGGAGACGTCATGTTAGTAAACTTCTGGGAAGATACAAGAGTTGACTCCAACCATCTA…
>GbNAC223
GTAACTTTCTCACCCTAATTTCAATTTTTTTCGCTAAAGCTCCATAAACTCTAGACTAAAATTGATTGAGGAATTGAAATCAATTTCAGCCGCTTTATTAACATTGAATTTTTGGAACTTCTTATATTTTTAAAATGATTTTTTGAATTCTTAAAATGAAATTTTAATATATATTTTTTCAAAATTTTTATTGAAAATATGAGAAACTTTTAACTTTTAAAAAATTATTTTTTTTAGAATTTTATGTACTTTTAAATAATATGGGCTAAATTGACAAAATTTGTAAATTTTTAGGACTAAAAAAAGTTTTTCTATATTTTTTAGCAATTGCCACATCAAAAATAGTAACAACAAAATTTGATGACATTATCGATTTGATCAAAGTTTTAGGATGCTCTT…
>GbNAC224
TTTTAAAAAACTTAAATAAAAAAATTTTTATTTTAGGGGAGTCGGGGCCTTGCCATCCCCTAGTTACACTCTAATTTCAGTTATCATCACTTATTTTAAAATTTTATGATTGTTAAATAAAAGTGGTTGGAGTGATTTGCAAAGAAAATAAAAGTTAGGCGTTTTATAGAGTAAACATTAGTCACGAGTTTTAACATTACTTTATATGTAAGACGAGTAACTAACTCTCAACTACTGATTAAGATAGAAAAAATTATTAATCTCACCTAATCTTCATAATTTTTGACATGACATTTTAATCCCATACTATTTTAATGTAATATTCTTTCATGTCAAAATTACGTACACACAAAAACTTTTAGGTCATAAACGCATATAATAGAAGTCTTTATAGATTAG…
>GbNAC225
TATATTTGAATAGGGTATAAGGAGAGTAAATTCAAAATTTTTTTTAAGGAGAATTGCAATTGAATTATAAAATTTTAAGGGTAAAAATCTAGCTCGGCATCATTTTTACCTCTAAAAACTTTTCACATATAAAAGAGAAAAGTACCTAATATAAAATACATGACACTCACATCTAAATCCTAATAACATCGTAGGATTAGTGAAAAAATTGCAATTAAGGGTTAGTTACTGATTGCTTTTGAAAAATGCCGTAAAAAGTTTGGTTTAAGATTTAAGTGTTTAATATTGCTATAAAAAAACACTGTTGTTAAGAAATAAAAGGTTCATTTTAGAGATATGTTGTGAAGTAAAAATATGCCTTTCAATAATATTTAAATTCGTTAATATTATTATATTTTA…
>GbNAC226
GAATCCCCAAAAAGTTAATAAAAAACTACATAAAAGAATGCATGAAAAGTGTTTGAGTAAATGCTTTTAATATACTCTTATTTACAAAAAATAAAGAAACAATGGATGAATGGAGTGATTTACAAAGTGAGAGGAGACTCTTTATTTATAGTTGAGCTCCTCCAAAACTGACAGTCTAGATTAAGTTACATTGGCGGGCAAGATTAGCCTATCCTTTAAATCATGGGATTTACAAAATATTCAATATCTAATCTAATCTTTACAAGATATGATTCCTATCAATCTTTGAAGATTAGTTCTTATATCTACTAAAATAGCCCATGTTGTCATATCTTTATCATTAGACCACCTGGACTTCAATCGAACAGGCTTCTTCTACAGTTTTTTAAATCGGGCAAG…
>GbNAC227
ACCTATGTCTTATAGCTAGCTCAAGTAGTCGCATTCCCCGCTATAGAGTATGAGTTCAAGTCTAACAATATACTTTTACACATATTATCAACTTATCGCTTATCCAGACATTTAAACTTTCGATAAAGTACACTAGTACCAGCACCGGCTTATATTTTGTAATTATTTTTGTAGGAGCAAAAATTCAGAGATTAGCATAAATACTCAATCCATTGCCATTGTTGGTCAATTCATCCAATTAAATATAATTTTCAGTTAAGATGTTACTGTCATTGCTCTCTTATATGTCCTCAAAAAGAGCCAAACTAAAAGACTATAAGACAACATCAAATATGCAGGCACCAACTGGCCAAAGAATTCGTATATTTGGCTCTAAACTCTATACTGTTCTCTGCAATA…
>GbNAC228
TAATATTTGAAAGAAATAATCATTTAAAAATTAAAATATAATTTTATTTTTATTTGATTTTAAATTTTAAAAAAGTCTTTACAGACACCTACCAGACGCCCGAATACAGAGAATGTGAGTGAACATTAGCTACCAAAAATATTTGTGATTACAACAACCTTATATGGTAAAAAGGAAAAGTAAATGGGAAATTAATTGTAAGGTTTGGTTGGATTATTAGAAAAGAATAATATTAATGATAATGTAAACAAAAAAAAATCTGACACTAATCCATTATCATATATTATAATCCCAATCAGTTTGTCAAGTAGAAGAACTTCAAGGCTGGCTATACATCAGAGACAGCCGCTGTGTCTGTCTGTCAAACATGGCCAGTCTCATTAATTAATATACATTTTC…
>GbNAC229
GCAAAGTGTACAATAAAATCATTCAATTAGGAAACACTTGAAGGTAACAAAATAGAGAAAAGGAAGAGAGTTAGACAAGACTAAGGTAATTGGAACCTTTGACTCAAAAGGGAAATTTTGTTGAGTTTAATAAGTTCAACTCTTACATTGGGTAACTAGGCTAAGCCAAATGGATCTATAAATAGAAACCTTAACATTTGGAATTTGCCTCTATACTTACACAATGTGCACATGATTTCTTTTTTGGATGATGTGTAATAATGTTGGAAGGTTAGGGAATAAAGCTATGTTAAATTTTGCAGTCTTAATTGTTTTCTTCTTCTTCTTTTAATTTATTTCTTCTCGAGTACGCATTGTTAATAATTTTTTTAAAATTTCACCTGGTTCAAGAAACATATT…
>GbNAC230
CTTTAACTTTCTTCTTCGTATCTTGTCTTGGGGGTGGTTGGTGGCGCCCCCCTCCACTTTCTTGTGTGTCAGTAAACAATGTCATTTCTAACGTTTAGAAACATCTCATGTATACTCTCTCGAGTTATGGTCAGGGAGATGTGATTTCTCAATTGTCCCAAGTTGGAGTCGTGGAAGCATTTCTTCGCGTTATGTGGTAATGTAAATCTTAAACTTTAGATTTTTTTCCCGGAGTTTAGATCAGGTGATTGCTTGCTGTTTTTGTCATATCTTGCTACTTTTTTCTTGATAATTATTTGATTTTACTTTGAGAACTTTATTCCTTACATATCGAAGAGGAGATTAATTGTCTTTTCGTTTTTAGGTATCTTATAAACATTGATCATTTGGTGTCAAGTC…
>GbNAC231
AAACAACAATTAACTCTTAAATTCAATATTTTATTTCAATTTGGTCCTAAACTTTTTTAGTTCAAATTAGACCCAATTTTGGATATGGTAGAACAATTTAGTAGTTTCCAACTCATTTAAGAGGTGATGATACCGTGTTTTGAGTTTGTGCCATAACATCACTCAATTATTTTAAAAAATTACACAAAAATCTACAAATAAATAAAAATTATAAAAGAATATCTTTATAAGTTTCTTATTTTTTTATATAAAAATTTAAAGTGATGATGTGACATTCTTTCAAAGTATCGTGCCATTAATTTTTAATGGTGCTAAAAGTATTTAATTATTTGACGAAATCAAATTTTTTATGTTTTTAATATTTTTATTAATTTATTAAAATAAATCGGTTAAACTGAT…
>GbNAC232
GATCATACTCAAAATATATATGTAATTAACACATAAAAGTATGTCATTTTAGAATATTATCACAAACACGTAAGCTAATGATGTGGCATGGGCAACACAAGTCAAAAATAGATTGTTCAAGTCCACACCATCTAACTTTCATGGAGTTACTAAAATGGACTAAAATGTGTGACGGAAGCCAAACTTAGATACTAATTTAAAAGAAATCTTATATACCAATTTGGACATTAAAGCAAACTTGCATTATCTCCTTAAAAGTGTTATGTGTCTTACCACTGTACCCAACAATTATTAATAGCTAGCTGAAAATTATGAAATTTTATTTAAATTTAAAATCAATAAATTATGAAAATTATGACAATCAGTATGTTATCTGAATCCCGATCCGATGAAACCATG…
>GbNAC233
AAATTATAATTCACTTCTTTTCACGATCTTCAATTTCAAGTTTCTTAATAAATATTCAACAAATTAATTGATATTATATTTAGATATTGTTTTATTCATTATTAGTCTAATTTTTAAAGTATACACTTTTCTATGGGTTTTTATTATTTGTCAATACGTAAGTCAGGTCAAGCGGAATTCGGGTTGGATTTAAATATGATATTAATACATTTTATGTTTGTTTAAGTTCGACCTGATCTAAAATATGAGCTTAAAATTTTGTTCAAATTCGCCTATATTTGTATATAGTTAACCCAAAGTAATTTTTATTTGTTCATATTATTTAAAAAAATTAATATTATATATATTAATATTATTTTTTATATAATATTTAATGATTTTAGATTTTTATTTATTAAA…
>GbNAC234
TGAAATTTATTTATAATATATTATCTTAGGTTTTTAATATTTCATCATTTTATTAACTGGGTTTGTGCTATATAATTATCTTTAACTTGTTTGACTCAATATAATAATTTCTTTTTGGAGTTGGGATATTTTTCTCTTTGCTTCTTCTCATATAAGAGTAGTATCACGATTCTTAATTTTTATATTTTGATACAATGTTTAGAATTATTCATAACATCTCTCCAACTCTTAAATAAGAGGATAATATGCTTCAACGCACTTAAACTTACATTCTCCTGAATTAATAACAATACAAATACCAACTAAATTAAAACTTGATCGATACAAATAAAATATATATATATAGCATGCCCTAAAATGACGTGACCAGGGAAAAACCTAAATTCGTTAAATCAATCA…
>GbNAC235
TAATATTACTAACTAATTGTGAATTTTCATCAAATTAACTTTAAAACTTGAATTGAAACTAAAAGGTTAACACTGTTATCTTCAAATTTCAAAATATATTACTTTTATCAAATACAAGTAATACATTAGACCTAAAAACAACACATGCCATTGTCTTGACTTGAATAGAGTGGTAATTAAAAGTCTTGTCAAGTCCCTACTTGACATAGATTCAAACCATATTACCTCATTCCTTACCCCTAATATTGCATCGAAAATAAAAAACATATATGACATTAAAAAATAAAAATCAAAGTCAGGTACCATACATTAAGCCTAAATAACGTTATATAATTTATCATAACATATGAAACTTATTGAAAATGCAGTAAATGTAAGTATTAATTCAAATTTCGAAGT…
>GbNAC236
AAGATATATGAAAGCTTTGACCGACGGAAACCACATACAAAGGGGAAAGTATTGTATGAAACAGAGATGCCACATCATCTGTATCCCTTTTCTAATAGTTTTATGCCGCATCAGCATTTTTATCCTGAAAAAAATTAAATCCAAATTAAAATTCTTAAATTCAGGATAAAATTGCTGACGTGGCATAAAATTATTGGAAAGAGATAATATCCCTGTTCGTACCGTACTTTCTCCTTACAAGGTAGATAAAATGGGGAGAAATTAATTAAAACAAAACAGCAAATTAAAGAAATATAGCACTCTCACACTCTCTACTCTGAAACTTACACCTTAAGTAACTTCCTAACCTCTACTCTATTTCTTTTAATTTTATATATTTTCTTCTTTGAACAAAAAGGT…
>GbNAC237
TTAAAAAGAAAATTCAGGTTCAAATGATATATCATTTGGTACCCGAATTTGACACTCTTTTCTAGTGTGGTACTTGTATTATTTTTGGTTCAATTTGGTACATGTATTCGATAAAATTTATATATTTTTGTCCCCAAAGGTAATAATGTTATTTTTTAGTATTTAATTTGGGATTTAAGATTGATCTCATGAAAGTCAATTGCTAATATTATTATGTTTGAAATTTTCATAATTTTGTTAAAAGAATAAATTTAGTGTTAATTATGAATCCATTTAATTTTAGTTTAATTTGTCAAATACAATACAACCAGAGGCGATTCTAGGGGGGTTGGCATGGGCCCTGGCCCCTCTAAAATGAAAAATTATCATTTAGGCTCTTTAATTTTTTTTTAAAAAATT…
>GbNAC238
AATCAATTAAAAATTTTAAAAATTCTTATTAATTTTACAAAAAAATTTAATTAAATCCCAATTTTTATTTAAAATTTTCTCATTCAACTCTTAAAATTTTGAAAAGTTTTACTAAACTCCCCCGAAACTTAAAAACTTAATCTCGGGATTCATCACGGTCATTAAAAGAGGTATTATACAAACTCTTGATTAAATTTTTTAATACAAAAAAATGATCTATACCTAAAAATATAGTATATATTAAAATTAAAATTTTTTTTAAATAATTGCACGTGTCAAAGAAGCATTGACTCAAACTTAAAGTTGAGACTTGAAAATTTTTTAACAAGACTCGGCAATTCTTTTTGGAATAAATAAGCCAATGGCAATTTCATTTAATCAATGGGATAAAACATCGTT…
>GbNAC239
TAAGATGTTCTGTCTCGCCGACACTGGTTAAGTCTTCAAACTCGACTCTGGCGTCGAAACATTCAGTGTACTGTGCTCAGCCTGCATGCCTCCAGCCAACTTGTGTAATGCAGCCAGATTGTATCCAACCAGCATGTTTCGGACCGCGTCTTTTTCCGAGCAAGTCCAAGAAAGAAAAGAAGAGCAAAATAAAGAGTGAAACGAATCAGCAAGTTAGCCCTCTTCCTGAGCTCATTGCAGAACCTACCAATGCTCGATCAATGTCCTTCGTTGGCACTCACGAGTACTTGGCACCTGAAATTATTAAAGGCCAAGGCCATGGAAGTGCTGTCGATTGGTGGACGTTTGGGATCTTTCTATACGAACTTTTGTTCGGAAAAACCCCGTTTAAGGGAGCCG…
>GbNAC240
TGTTAGAACGCAGTTGTATTATTTGAAGAAAACGTTGTATCGTCGTGACGTCCCATGCATGCTTGTCATGATGTCGCCCTCTCCGTCGATTGGAGAACTCGTTGCGTCGTCCCGACGTCCCTCGTTGTGATGTCGGTGTCCTCCACGTCATGCCTATTTCGCATTTATCGGACACTTAGCAAAGATAAATGCGAGACACAGCCTATATATATTTTTAAATTTTTTATTATTATACCTTATATACATTTAATATCAACTTTGTTAAAATGTTAAATTTCACTCATAATGTATAAAAAGAAGATTACATAGATACGGAAATTTAAATCTAAAATTGAAGTTAGGTTTGCACATAAATGGGAGTGATTAGGGTTGTCATATAGTAACGTTTTCTACGTCATT…
>GbNAC241
ATAGGTCACAATGTGAATGTCACAAGTGAATAAATTCATAAATGGATTTAAAATCTATTTTATTTGGGTCTTGTCTGATATATTGTCAGTCCAGTCAATCACATTTATGTCTATCTTCTGGGAGTTATTCGCTCTGGTGCTCAACACAAAGCATTTGTTCAATTGGACTTGATAAATGACATATTAATCTTTCAATCGATTTGCTCATTTCTAATTAGATTAAGGACATGTTTAGATTCATTTACTAATATAAGTTATCTTTACGTATTGTGATCTGACCACGTAATACCGATTAGTATTAGTTAAACGTTAGGTAATCGATGAGTCAAGATTTACTTTCATTTTGATTTGTGTGTAATTGTGCATTTTAACAACTACACCAATTATGTGCCGCTAATT…
>GbNAC242
ATATGAATAGCTTTAATATACATTAATAAAATTTAATAATATTAAAATAATAAAGATATTTACCAAAAATTTTAAGAGTATTATAAGTAGTTTATTAAATAATTGAAAAATCAAAAAGTTTCTGCGAATTTATTTATTGAGGACTCTAGTAAGCTTTTATCACAAAAATTAAGGAATTAAATTAAAGATATGTTTGCCCTAAGAATATGATACTGTACGTATAAGAGTTTAGATAAAAAAAAATCAAAGATATTGTATAAGACAATAATTGGAATATTATTCAAATATGGAAAGAATCAATATACTTTAAATTAACCTAAATTGATTTAATAATTTCTAAAACATAAATATAACCCAAATAGGAAATTTAATATATTATCATATTGAAATTAAAAAATT…
>GbNAC243
ATTATAAAGTAACAAATATGCATTTAAATAATGTTCAAATTAGTTAATATTATGTTATTTTAACAATAATGTAAAATATAATTTATTATAACTTGTTGTTAATATTTTAATATATAAAATATAAAATATTTTTTAAGCAATTAATATTAATTATTTATAAATTTTAATTAAAATATATAAACTATATTTTAAATATTTAAATATAACCATTAAATATTTGTAGTTAGATATTAACACATTTGTATTATTTTAATAAATACTTTTTTAATTAATAATTTTATTTTAAAATGTAATTTGAATATATAACCCATATTAGATATTTACATAATAGAAAACATAAACCTAACAAATTTTACATTAACATTTGCAATTTAAAAGGAATAAAAATTGGGAGAAGAA…
>GbNAC244
TATGCAGGATATTAAAATAAAAAAATTAGATTAAATTGTGAGTAAATCGAAATTTAAACATAAAAGCAACCAAATTAAGAACGCTAAATAAATACAATATTTGTTTATCATTATTTTGTCATCAATTTTGAGTTGGTGTCATGTTCATTTGTGACACTAACTCAATCAACAACATTATTCACATACACAGATATATAAAAATTTAGAACACATACATACTTATTAAAATTCAAATAAAAACTAAAAATTACTTTAGTTCAAATGGTAAATAAAAAAATTTATCCCTCGTTCAAATCTCATTATGGATAAATTATGTAATTTATTGAATCGAGACTCAGTCAATAATTGACACCAACTCAATAAAATATTTATTATTATTATTCGCTTAAAATAAAAAAA…
>GbNAC245
GAGTATAGTGTATGGTATTTTTAAAAATTTATTACATCACTCTTACGTATTTGAAATAAATTATATTTTTACAAGACTATTTTTGTTATATTTAAAATAAAACTAATAACAAAATACAAAAGATGTGATTTTAACCAATGACATCAACATACATAAAATCACAACTTTAATTTAATTTTGTTTTTTGCATTTTAATATTATTATATAAAAGCACCCACACAACATATTTTATTCCGTATGTATTATTTATCCATACATACTACATATTTTATTAAGGGACCTATAATATAAATTACATGTCTTGGTTAACAAGAAAAATGTGTATTTATTTATAAACCAATTTTTAATTGTTCAATAACATGTTCACTAAAAATTTATTTAATAGAACATATATAATTT…
>GbNAC246
TTTGGATTCTCTACTTTCTGATCACCTCGTAATCTTATATTCTCAAATAATAGTTAAGATGCCATAATATAGGGTGTAATCTTATTACGATTTTTGGGATAGAATTTGTGGCTTCAGCCAATAGGGTTTATCTTTTTTCTAATTTCTTCAATGTGAGAGATTACCTTTTGATTTACCAGAAGCAAAGGAAAAATTAGTAGCAGGGTATCAAACCGAATATTCAGGTATCAAATTTGGTTTATTTTACGTTGCTTCCTATCTAAATCTATTATTTTCTTCGTTATTTGTAACAGTTCTTTACTTGGGGGTTGGAATATTTCCATTCCGTATGAATTCGTCCTTGAGCTATTTAAAATAAATGGAATCATCGGAACGACAATTGGTATCTTTATTATATTA…
>GbNAC247
TATATGTATTAGGCTATTACTCATTCGGTTAATTCGACCAAATGAATATTGTCAATTAATTTTTTATGTGTTTTATACTTGTTTTAACCAAACAACAAAACATTTAAAGTTTAGTAAGTGAGAACCGACCGTATTAACTGAAATATTTCAATTCGGTTAAAATTTTTTAAAAAAAATTCGATTCAGCTAACGGTTAAAGAAATAAAAAAATTTAATTAATTCGGTTAATACTATTTTAGTTTGATTAATCGATCGGGTAACAGTATTAAAGTTTAGTAAGTGAGATGAAATTTGTTTTTGTTTGTTTTAATGTTGTTTTGATATATTAAGTTTGTAATAGTTACTACTGAATTTTCGTTTTCAACAATTTTGGTAATTTGACGGTTGAGATAAAGACAA…
>GbNAC248
TTTATCTAGCCTTGAATGACAAACTGTTTACATTCTATATTAAATTAAATTGTAGTTTAAGTTGGTTTACATCAAAAATGGTTTTAAAAATATCAATTTTATGTTAGTGACACGATATTCCCGGATCCTCCTTAAGGGTAGGGTTTGGAGTGTTACAATTTGAGCTAACAGGAATGTAATCAAGTCAAACAATTTAACTTCCATAAAATTGCTCCCATTTAATCGATAAAGCTAAATTCTTTAGGAGATGTAATCAAGTTAAACAATTTGAGTTTCAGAGATTTGCTTGCACTTAATCAGTAAAGTTAAATCTCTTAAGGGTTTTAATCAAGTTAAACAATTTGACTTCCACAAATCTGCCCCCACTCAGTCCGTAAAGCTAAACCTAGTAGGGGATGT…
>GbNAC249
GCACGCATACTCAAATGCAGAACCCACCTCTGTGCTACACCCCCATTCCCTGCAACCCAATTACATCTGTTTTCTTTTATCACACTTTTCTTTATATTTCATAATCATATCTTAATAATTTGTTTTATATAAGTATATTATATTATTTAGTATTTGAGTTTAATTTTAATATTAAATATAGTGTTTATATTAAATAATATTATGTGACTCAATAACTATTTGACATTGTGCTCTAACAAAACACCATATATATATTTAATTGGGATAAAAAAGAAGTTCGGGTATCAAATTGAACAATGAAACTAAATTTTTTATATTTTAGATAAAAGAAACTCAAGTATCGCATTAAAAAAGGTTAATATATTATTAGGTACTAGTTTTTTTGCAATGTTCAATTTG…
>GbNAC250
TCCATCATTTTTAACATGCTAAAATCATTCCTATATAAATTCTAGTTTTAATATTTTAAGATTTGTTATTTAGTATACTATCGAAAGTAAAAATTTTCTAAGTAATAAACAGATGTTGGGTGCAATGATAATGTATATTGCACTCTCAAAGAAAAATACAAACTTAAATATTAGAAACGATATTACAGAGAAGAGCAGATATAAAATCGGAACATAAACCATAAAAAGAACATGGAAAATATAAAAAATAATTAATGGGACATGTGTTTTCATTTTTAAGATTTTTTTTTCACAAAATTAAAATATGAACGAAATAAATACAAAAAAACATTCAACCCCTAGTAACTCTACCTCCTACCTTCTACCCCAATTATCAAAATCTACTTCAACTCCTACCCT…
>GbNAC251
AGGGTGATGCAGAGGCGGCACTACCGATTTTTTTTTGACAATGACAGAAATCAGTTAACCAACAAAATAATAATATTATATTGATGGAAGGTAGCTAGTAGGCAGCACCAAAATAACCCGTACAACCCAATACAACCTGAACTGGTGGTGCCTACTTGACAAGCGGCACCAAAAGTGTCTACTTAACAGGCGGCACCAAAGCCTAAATAAGAGTAGGAGATTTTATCAACCTTGGATCTATTTGAGAAATTGGTCCTCAAGAACATATGTTTTCTCAAGGGTTTTGCCAATCAACTTCTCCTACAGGGCGATGAGCTCGTTAAATGAATAGGTGTTCTTGGAAGACCTGATGAATAGAGTCTTGTTCAATGTTCTGGGGTCATTGGCAACTTTGATGGT…
>GbNAC252
TCTTTTATCTCTCTGTATCGCTCTTTCTCATTTCTCTCTCTATTCTTTAGTTCCCTCCCTTTTCACTTCTTCTTCGTCTTGTTCTTTGTCTTTGTTTCTTTGTCTTTGTTTCTTCTGTTTCAACCAATAATTAACTCTACAACTATAGTTTAATCCAGGTAAGCTTTTGAGTTTTGCATGGAAAATCAACTCCCTTTAATTTCAACATTCTCGTTTATTCTGTTCAATTCTGTTTTAGTACAGTGTTCTTTCAACTTCTTGTAGACTTTTTCTTTTTCTTTTTACATCAGTTGCATGTTTTCATATTTCTCTCTTCGTAAGGCAACCAAATTTGGTTGTGGAACTCCATTTTGTTTGATCAAAGAAGCTAAGCCAACTTACTAAACACATAGAAGACGG…
>GbNAC253
TATAAAGTGGTTGGACCGTCATTTTATCAACCAAAAATAATGATTGGAGGTAAGGAATTTAGAGCATAATTAAAATGATTAGAACGGTGACCTTTAAAAGTTCTTAACTAAATGCCCCAATTACGTGCCACTACTTGTGACATTTGCTCATAATAAAGTTAAAAAGAAAATCTCAAATCTCAATGGTAAATACCTGTTTTTTTAATGAAATTTTAATTTTTTAAAAAAAATGAAATAATTCGGTTTGTTATTATGTTGTGTTAAAAAGTTTGATTCAACTTCTTAACATCTAAAGAAGTGACCAAACTTAAGTGGCAATGTTCGTCATATTTATTGACCATTAAAAAGTACAGTTCACATCATACAAGAAAAATGTCTAGAAGAGATATTGACATGACT…
>GbNAC254
GATTTTTCAATAACCGAGAGTTTAAGAAATTAGAAAGGTGAATTCTTTAGGCTTAATTTGATTTTCACATATCATTAATTAATGTATTACATAATTTATATACAATTGTTAAATTTAAATTTTATAAATGTCTTTGAGTATTTATTATACATATAGAATAAGTGAATTAAAATTAATTTATATTCATAATTAATGATTTTAAAATTTATTTTAATTTATAATTTAACATAAAGATTTATTCTTATTTATAAATTTTAATATAATTATATAATATTTAAAATATATCTTCATAAATTCAGACTTTTTTAAGTTTTAGATCGCTTTTAGGCTGAAACCTGTTTTGCCAGTTGTAATAATTTCTAGTTTATTTATTTATTTATTTTGATATGTCAATATAAT…
>GbNAC255
AGCCAATTATTGGGTGATTATGATGGACGGTGCCACCAAAGACAACAATGACATCGAAATTTACTGTTTAAAACAGATAATTTATGTACATAATTTTCAGGGTAAACATTATCATAAATAATAAAAACTTTTGGGTATTTTTATGAAAAAACCAAATGTGATGATATTTCTTCTAAAAAGAATAGTGGGAATTTTTGTGGATATAATAAGTTTAATATCCCTTATAAAGTGTAGAGCAGTAGTTATTCATATCAAATAAAGCAATATTAACCGAAGAGTGAAACAACTTTTTCTTTATTACTCCATCCAGTCGTATAAAAAATTATATTATTAATAGAGAAAATATTTGATAAGTAATTTTTAGACTTAATAAATAAAATTAAGTGACTGATAAATATC…
>GbNAC256
GTAATATTTTTAATTATGTAGTGATTTAATTCGGGTAATTCGGGTATTCCGGGTAATTTTTAACCAAAAATGCACAAAACATATTTTTCGGTTAATTCGGTTAATCGAAAAAAATTTCGGTTAGGTTAATTTTTTTAAAAAAATTCGGTTCGGTTAACGGTTAAAAAATTTTGAAGGTCGGTTAATTCGGTTATACAAATTTCGGGTTGGTTAACCGAATGAACACCCCTAGTAACTGGGTTGTTAAGGTTTTTTTTTTTAAAGAAAATTCGGCTAGTGTGCTCTAAGCGATGATTCACGATCGGTATAATGACAGTACCAATAAATGGGTAAAAGAATATACTTTAGATTCAAGTCGATCTGAAGGTTAGTGTTGAAGATCGAAGAAGAAAGCTATTT…
>GbNAC257
CCTTAATTGGCAATATAATTAAGATTTATGTCGACTATAAACTATGTAACATTTTAATCCATCTCAATCATCTATATGGAATAAAAAAATCAAAATTAATTGAAGTATATATTTTCTAAAACTAAAACATATAATATGGATTAGGTAAGAATGTGAAAAAAAAAATTACATTTAAGCATTTTATTGAATTTGTGTTACTTTTAATTGGGCTTATAAAAGTATAAAAATATATTTTTTAAAATTATAATTAATATTACAAAGACATTTCTTTGAACAATCTTATTATAAGTTCTGATCATATTTGCTCTGTTTGACACAATATCTAGAACTACTCGTAGCTCCCTCAACCCATAAATAAGAAGATAATGCGTTTCATCGCACTCAAACCCACGTCCCCTA…
>GbNAC258
AATAGTTTTTACAAATTTTTTGAATTTTTTAAAACTTTAAAAATTAATTAATTGTTGGTGTGGCAATCCATGTGTATGCCATGTTAACAAAGTTAATATATGTTAATTTTTCCAGCCATTTTTGGGTGATTTGACAAAAAATATAAGTTTAAAGGCTAAAAGAGGCGAAAAATTAAATGGAGGGATAAAATAATTTTTTTTGTAAAGTTGGAGGGCAAAATAAGTCATTGTGCCTTAACTAAATGATTGTTCATAAAAATTTCGGTTTGATTATATGAAAATTTTAATTACCCGTTAATTCGATTCAATTAAGGAAAATTAATTGATTTATCTTTTTTTTAAATGTAACAAGTAGAGTATAATTACAAATACAAGTTCAAGTAATCACAAGTATTTAAT…
>GbNAC259
CGTTAAGCGTATTAATCACCCAAAAATAATTATAGGATTTTTTTATTCTTTTGAGATAAATTTTCAAAGTATTATTCTGTTAGGAATTGATAATTCTTTTAGTCTTTCGATTTTGTTGAGAGCTAAAGTACTTGACGAGTTGAACTTACTACCTCTTTAAATAGGACGAAATCCGAATACAAAACTTTACTGAAACTAGAAAAGAGAAAAAAGAAAACCCAACAAATGAGCATGTTAATCTATCAAATATTCTAGACGGGATAATATTCCGGTTATTATTACTATGATTTATCAACTTTGGTAGTGTACATCACGCTGTTAACAAAAAAGAAAATAAAATAGAAAAGGAAAAGAAAAGAAAATTTCTGACATAATATTATTTTTTCCATAACTCTATTT…
>GbNAC260
TTCTTGATTTATGAGTTTCAGTCTAAATTAATATTTATATAAATAGATAAATGTTAGCGTGCCGCTGGCATCAGAATAGACGTCACACGAAACAAAAGAATATTCATATAAACGGAATATAGTTATGTAGTAGAATGTGTAAGCTTAGATTATAATCTCAAAATTCAACCACATTATCATATTGTCCGACCTACAACTACAGGAAGGTGATAAAAAGAGATGAAATGTCCAGTTTTAAGGTTAGTATAAAAAAGTGGTTGCTCCGTCAATTTCCACACAAACTTCATGATTACTGCCATAGAATTTAAGACGATTAACGATCATCATATGCTTATGGCTTAGACACCCCCCCCCCCCTCTTCCCTCTTGACTTGTAACCCAATATGTACTGCGATTCCC…
>GbNAC261
CACAAGATTGAAATGCGTCGACTCAAAGATGTAATGTAATGTTGCCATCAGGGGAAGTTTAACAACAAGTTGTACTATTTTCCTTTAACCAAGGTTTTGTCCCATTGGATTTTCTTAGTAAAATTTTTTAATGGGTCAGCTTGTAATAGAAGATTGTGTACTATTTTTCATTCATTAGTTTTTTTATTCCATAGGGTTTTTCCTAATAAAGTTTCAATGAGGCATATTATCTACCAATGGACATCCAATGGGGAGTATTATGAATATCTTATTAAGTAGATGTCCATCATGATCAAGATAAAATTTTGATATACTTTAAATTCTAATAGTTACTAGAATTAGATACCTACTTCTTTTATACTTATAGTTTTTTTATTCTCCCCATCTCTCTTTATTTTA…
>GbNAC262
AATAATTTATAAAATACTTAAAAAGGTTTGCCGTGAGAAAGCTCAATTTCAATCAAACTGTTCAATTGGACTCTTGGATTAAAACAAGTAAGCTAAGGCATTAACAATGTGTAAAAGGTTTTGATTAAAAATATGTTTAAAAAGGAAAGATGAAGGATAGGTTGAAGAAAAAAAGAGAAAATCTTTGTGTTATTATTTATTTAAAGTGTTATAAATTATATATTCATATTGGATTTATGTTAGTTGTTTTGGTATCATCATAGTTTTAATTCATTTTATATTTTGTATAGTGTGTCACTGTGGTTCAATTTAGAGATTTTTTTTTTTTATGTTTGCTTTATATCTCATTCATTAAAGATTTTGTATAATTCTTTTTATTATAATCTTTATTAAAGAGAA…
>GbNAC263
TATTTTTTAAAAGTAATGTTAAACTGGTGCTAAGTCATATTTAAGTACATAATATCTTTTAATTTAAGACTTAAAAAATTTATAAATAGTTTAAAAATTATATATAAAAGAAAAAAAATGTTACTGTAATAGCTAAAATAAGTATATATAAAAGAAAAAAATTATTTGTTCAAAAAAAATTTAATTCTCTTATTGAATTAGTGCTAGGTTTACTTGTAACACATATTGAATTAAAAAATAAGTAAAAATCATTTCTAATACAAAATAACAAATATTATTATTAAGCTATTTTTTATATTTTTATATAAAATTTACAAAACTAAAATAAATTTTAAAAAATTACCCTCCTATAGTGGGATTTAACATTGGGAGCTACGATACCATAATTTTTAAAACTTT…
>GbNAC264
CCTTTTTCCATACTCATGTACATATTATATATGCAAACTATGCAAGTGAAATAAGCCTATTAAAATTAAACAATAGAGTATGATGAAAGAATAATGAAGGTTATTTGTGAAAGCCTTTGGTCTTGATTTGGTCTACAGATATAGGTCCAGAAAGTCAAATGATTTGGTTTTTAGGGGTTTGAATTCTATAACTCTGAATGATAGGCGAGTTTTTCACCAAAAATGGTCAACAGAGATGTTCAGAGTTTAGGGCAAGTGGTCCCAATTAATTTGTGCATTAAACTTGATGAATTACCACCTTAATTTGTGTTTATAATATTATCTCTTTACTGATACGGGGAATACTATATATTATAAATCTGACAAAATCAGTAGAATAGAAGCTCTGGGAATGGAATA…
>GbNAC265
TATATAGATTTTGCTTATCTTCGATTGATTCGAAATTTTGTGCATACATAAATGCCAAATATGTAATAATTACATGGACTTTTTAAATTTTTTAGATAAGGTTTAAGGGTTGACAATTATTTTATAAAGATATAATATATTATTAAAAAATATTTATTAAATTTAAAAAAAGAATAAAAAATATATTATTAATATATTAAATACTTATTCATAGTGAAGTATTAAAATATGTACCAAAAATAGTTAATTATTAAAACAATAATTTACTTAATATACTGAGGTTAAATAAAGTAATAAAAGGAACTTTTTTCAATTTATTTGTACGCGTTTGTTATGTCGCACTTTTTATAAACATAAGATAAGCTTTGTTTTCACACACACATGAAAAATAAAATAGTA…
>GbNAC266
TACGGTTAGTAACATTTGGTGGGACCACTAAGGATTACATAAAAGTTAGCATAACATCTCAATGACTTGACACCTAAAATTTCTTCTAGAAAACATGGGTAATTAACCTCACATTACCTTTCTAATGGAATTTTTAGAATGCACATCAATATAATTTTCATAACTACTGTCTTCAGATTTTAGCTTTCATTGATTTTTCAACAAGAGATGCATTGAAATATTTCATCTTCTACTGTGCAGTGTTTTAATGCAATAAGATTATCACTTACGAAACGCCCATTGTTTCATTTATATGCATCCACTAATAGTGGATAGGGTGCCAATCCTAATTATATATTTAATGGATAATTATTCTATATACGGATTAAAATAAAATAAAAATAAAAATAAAATTATATC…
>GbNAC267
TAACTCATAAATAGGAGGATAATGCGCTTCAGTACACTCGAACCCACATGCCAATCAAACTAAGGGTCAATTAGCTAAATTATCCCTTTTAAAAAAAGTAATGAGATATTCCAATTACCAAATTTGAAACATGAATGTATTAATGACAAATATTAATGAAAAATATTAAAGAGGCATTTGATTCAAGAGATGGAAGATTACTGCTAGTAATAATGTAATATTATTACTGGAATGTAGGATTACTTAATTAGCATATGACTGGGTATGTTGTATTAAATAGTTTGGTTCATTTGACTTTATTGTATGACTCACAAACCTCAGATTACATTTAACATAGTATTAATATAATTAAAATATTATTTTTATTTTAGGACAAATCTTATCCCATTAATTGAATGC…
>GbNAC268
CAAACCTCCATAACCTTCACTTTCAAACTTTATATCAACAAATCATAAAATGATATATCAATACAATAAGTTGTAATCTATAACTATATATAAGGAAGGTCCTTGACCTTCCCTTTGTTGACACGCGTGTGTGATTTCCTCTTTTTACATTTTTCTAAAATGATTGGTTTTCAGTTTTAGTCTCTATGCTATGTTTAACTTTGAGGTTTAATCTTTATATTTCATTTTTAATCGGTCCCTATATTTTTATAATGTTATTAATTAGTCCAAATAACTAATATCATTATCTTTTCAATCAAAATGTTACGTGTTTATATATAATTTGAATGCCTTAAGGATCTTAGAGGTTGATAAGTGGCTTCCCATTTCTTTTGGGTTTGCCTTGCTCTTTTTTTTTCT…
>GbNAC269
TCATTCATCAGTCAACCATTTTGAGCATATGATATACCGTTATAAAGGTCTCATGGAGTAGAATATGAAAACATAGTTTTATGATTCAACTCTTCACCTTTACCTATTGAGATTATGCCTCAAAGTTCCTATAAAATACATTTTTTCCAACAACGGTATGTTCAAAACTTGTGGCTAGCAAGGATGTTTGCCAAGCAAGTGGATTATCTCTAGAAGCGGGAGGTTTAGCTCTTTCAAGAAGACGCATGCAATCCAAGTCTCTTGCTGAGATAGAGGGTCAAACGGAGAGTAAGAATCTGGTAGAGACAGTCACCAAGGCGTTCGAGTAGAGCCAAAGGATTGGTTACGATTATTTCTCAGATGGTTTGTCACGCTGGCACGTGTCCACCTGTAGTGGAA…
>GbNAC270
AAAGTTATTATGTGTGTTGTTTAGTGGTTATTAATTCTTATTTTCTTTAAAAAAAATATTAACTTAATTCAAAATTGAATCCAATCAAGCCATAAGTTTCGAGATGAATTGTACCTTTTTAAAATAGCTGGATTCCACTTAATTTATATCAATATTTTTTGGTTAGGGATTTGGAGTTAGGCAAGATTCTTGGTTGTTTTATATATATATAATTAGTTGATGAATAAACCAAAAAAATCACCCATTAAATTAAAAAAAAAGACTGGAAATAAATAAATAAATAAATAAATAAATACAAGCAATCCATGTTTATATCACAAGTGTGTAGGCAGATTATTCAAGAATTGACTTAACCCAATTCTTTTGTTTTCTTCATTTATTAAATGTCATTGTCAATTT…
