# Supplementary material for: Systematic analysis of NAC transcription factors in Gossypium barbadense uncovers their roles in response to Verticillium wilt
Source: PeerJ. 2019 Nov 5;7:e7995. doi: 10.7717/peerj.7995 (PMC6839521; doi:10.7717/peerj.7995)
Supplement: Table S7 [file peerj-07-7995-s010.xlsx]

## Sheet: Sheet1
Table S7. Cis-regulatory element analysis in GbNACs
ID	ABRE	ARE	AT-rich sequence	AuxRR-core	CGTCA-motif	DRE	ERE	GARE-motif	LTR	MBS	MYB	MYC	P-box	TATC-box	TCA-element	TC-rich repeats	TGACG-motif	TGA-element	WUN-motif
GbNAC001	0	1	0	0	0	0	4	0	0	0	1	3	0	0	0	0	0	0	2
GbNAC002	1	1	1	1	1	0	3	0	1	0	3	2	1	0	0	0	1	0	0
GbNAC003	3	0	0	1	1	0	4	0	0	2	2	0	0	0	1	2	1	0	0
GbNAC004	1	1	0	0	0	0	0	0	0	0	1	5	1	0	0	0	0	0	0
GbNAC005	0	1	0	0	1	0	1	0	0	0	3	2	1	0	1	1	1	0	2
GbNAC006	9	0	0	0	1	1	4	0	0	1	1	2	0	0	0	0	1	1	0
GbNAC007	5	0	0	0	1	1	0	0	0	0	4	1	0	0	0	0	1	0	0
GbNAC008	5	2	0	1	0	1	0	0	0	1	4	1	0	0	1	0	0	0	1
GbNAC009	0	2	0	0	0	0	3	0	0	0	1	4	0	0	1	0	0	0	0
GbNAC010	0	0	0	0	0	0	3	0	0	2	1	2	0	0	0	1	0	0	0
GbNAC011	0	1	0	0	0	0	5	0	0	0	4	3	0	0	0	0	0	0	1
GbNAC012	0	1	0	0	0	0	5	0	0	0	5	3	0	0	0	0	0	0	1
GbNAC013	3	5	0	0	2	1	4	1	1	0	2	3	1	0	1	0	2	1	1
GbNAC014	3	0	0	1	0	2	4	0	1	0	0	3	0	0	1	1	0	1	3
GbNAC015	4	2	0	0	0	0	6	0	0	0	1	5	1	0	1	0	0	0	2
GbNAC016	0	3	0	0	1	0	7	0	0	0	1	1	0	0	0	0	1	1	3
GbNAC017	0	2	0	0	1	0	2	0	0	1	2	1	0	0	0	1	1	0	1
GbNAC018	1	2	0	0	2	0	2	0	5	0	3	3	1	0	1	0	2	0	2
GbNAC019	0	2	0	0	0	0	0	0	1	0	2	3	0	0	1	0	0	1	0
GbNAC020	0	0	0	0	0	0	0	0	1	0	0	4	2	0	0	0	0	0	1
GbNAC021	0	4	0	1	0	0	2	0	0	1	2	2	0	0	1	0	0	0	0
GbNAC022	2	2	0	1	1	0	1	0	0	0	5	3	0	0	0	1	1	0	1
GbNAC023	6	1	0	0	0	0	0	0	0	1	1	1	0	2	0	0	0	0	0
GbNAC024	0	2	0	0	0	0	1	0	0	0	1	4	0	0	0	0	0	0	0
GbNAC025	0	2	0	0	0	1	5	0	0	0	2	2	0	0	0	0	0	0	1
GbNAC026	2	2	0	1	1	0	1	0	0	0	2	4	0	0	0	0	1	0	1
GbNAC027	0	2	0	0	1	0	5	0	0	0	2	3	0	0	0	0	1	0	3
GbNAC028	6	3	0	0	1	0	1	0	0	1	1	1	0	0	0	0	1	1	1
GbNAC029	6	2	0	0	0	1	2	0	0	0	2	1	0	0	0	1	0	0	3
GbNAC030	1	1	0	0	1	0	2	0	1	0	2	3	0	0	0	1	1	0	0
GbNAC031	0	1	0	0	2	0	1	0	1	0	1	3	0	0	2	1	2	1	0
GbNAC032	0	1	0	0	2	0	5	1	0	0	4	2	1	0	3	0	2	0	1
GbNAC033	0	1	0	0	0	0	1	0	0	0	4	8	1	0	0	1	0	0	1
GbNAC034	1	0	1	0	1	0	4	0	0	1	3	3	0	0	1	0	1	0	0
GbNAC035	1	1	0	0	0	0	8	0	0	0	1	3	1	1	0	0	0	0	2
GbNAC036	1	4	0	0	0	0	1	0	0	0	2	2	0	0	0	1	0	1	0
GbNAC037	1	1	0	1	0	0	5	1	0	1	3	2	0	0	0	0	0	0	2
GbNAC038	1	0	0	0	1	0	4	0	3	1	2	1	0	1	0	0	1	0	1
GbNAC039	2	2	0	0	0	0	2	0	2	2	1	3	0	0	1	0	0	0	1
GbNAC040	3	2	0	0	1	0	0	0	1	1	2	1	0	1	0	0	1	0	0
GbNAC041	8	1	0	0	2	1	2	0	0	2	2	1	0	0	0	0	2	0	2
GbNAC042	5	1	1	0	2	0	4	0	0	1	0	4	0	1	0	0	2	0	0
GbNAC043	0	1	0	0	1	0	4	0	0	0	1	2	0	0	2	0	1	1	2
GbNAC044	4	1	0	0	1	1	3	0	0	0	2	1	0	0	0	2	1	1	0
GbNAC045	1	2	0	0	1	0	0	0	0	0	0	4	0	0	0	1	1	1	2
GbNAC046	2	1	0	0	2	1	2	0	0	1	3	1	0	1	0	0	2	1	0
GbNAC047	0	1	0	0	0	0	4	0	1	0	5	1	0	0	0	0	0	0	0
GbNAC048	2	0	0	0	1	0	3	0	1	0	2	1	0	0	2	0	1	3	1
GbNAC049	4	2	0	0	3	1	1	0	2	1	3	3	0	0	0	0	2	0	0
GbNAC050	1	1	0	0	1	0	4	0	0	0	0	3	0	0	0	0	1	1	1
GbNAC051	5	0	0	0	5	0	1	1	1	1	2	2	0	0	0	0	5	2	1
GbNAC052	5	2	0	1	1	0	4	0	0	1	3	3	0	0	2	1	1	0	2
GbNAC053	3	3	0	0	0	0	0	0	0	1	2	1	0	1	0	1	0	0	1
GbNAC054	4	0	0	0	0	0	4	0	0	1	2	2	0	0	0	0	0	0	0
GbNAC055	2	0	0	0	2	1	1	0	0	0	1	9	0	0	0	0	2	3	0
GbNAC056	1	0	0	0	1	0	1	0	0	1	2	1	0	0	0	2	1	0	0
GbNAC057	0	1	0	0	0	0	3	0	0	0	2	0	0	0	0	0	0	0	3
GbNAC058	1	6	0	0	2	0	1	0	0	1	2	3	0	0	0	0	2	0	0
GbNAC059	1	1	0	0	2	0	1	0	1	0	1	1	1	0	1	0	2	0	3
GbNAC060	3	2	0	0	0	0	0	1	1	2	3	3	0	0	0	1	0	0	0
GbNAC061	0	1	0	0	0	0	0	1	0	0	2	4	0	0	1	0	0	2	0
GbNAC062	0	0	0	0	0	0	5	0	0	0	1	1	1	1	0	1	0	0	0
GbNAC063	0	2	0	0	0	0	2	0	1	1	2	1	0	0	1	0	0	0	0
GbNAC064	3	0	0	0	2	0	2	0	0	2	6	2	1	0	0	0	2	1	2
GbNAC065	0	1	0	0	0	0	0	0	0	0	2	0	0	2	0	1	0	0	1
GbNAC066	1	0	0	0	1	0	7	0	1	1	1	2	0	0	1	1	1	0	0
GbNAC067	0	1	0	0	1	0	1	0	0	0	0	0	0	0	0	1	1	1	0
GbNAC068	1	0	0	0	1	0	2	0	0	0	3	2	0	0	1	2	1	0	2
GbNAC069	1	2	0	0	1	0	7	0	0	0	0	2	0	0	2	0	1	0	2
GbNAC070	2	1	1	0	0	1	1	0	0	0	4	2	1	1	0	1	0	1	0
GbNAC071	5	3	0	0	0	0	1	0	0	0	2	4	1	0	0	1	0	2	0
GbNAC072	0	3	0	0	2	0	1	0	0	0	0	1	0	0	0	0	2	1	1
GbNAC073	1	1	0	0	1	0	10	0	2	1	1	0	0	0	0	0	1	0	2
GbNAC074	1	1	0	0	2	0	1	0	0	0	1	2	0	0	0	0	2	0	1
GbNAC075	2	4	0	0	2	0	6	0	1	0	2	1	0	0	0	0	2	0	0
GbNAC076	0	1	0	0	0	0	4	0	0	0	0	2	1	0	0	1	0	0	1
GbNAC077	1	0	0	1	0	0	5	0	1	0	3	0	0	0	0	1	0	0	0
GbNAC078	2	3	0	1	1	0	0	0	0	0	1	0	0	0	0	0	1	0	0
GbNAC079	0	1	0	0	1	0	1	0	0	1	2	7	0	1	0	0	1	1	0
GbNAC080	2	2	0	1	0	0	1	0	0	1	1	4	1	0	0	0	0	1	0
GbNAC081	1	0	0	0	0	0	3	0	0	0	0	1	0	0	0	0	0	1	0
GbNAC082	2	2	0	2	0	0	2	0	0	1	2	0	0	0	0	3	0	0	1
GbNAC083	0	0	0	0	0	0	4	0	0	0	2	0	0	0	0	0	0	1	0
GbNAC084	3	1	0	0	1	0	1	0	1	0	2	4	0	0	0	0	1	0	2
GbNAC085	0	2	0	1	0	0	1	0	0	0	1	0	0	0	0	1	0	0	1
GbNAC086	1	0	0	0	0	0	1	0	0	1	1	4	0	0	1	2	0	1	0
GbNAC087	0	3	0	0	1	0	3	0	0	0	4	6	0	0	2	1	1	0	1
GbNAC088	1	2	0	0	1	0	1	0	0	0	4	4	0	0	1	0	1	0	0
GbNAC089	0	2	0	0	1	0	2	0	0	2	2	0	0	0	2	0	1	0	0
GbNAC090	3	5	0	0	2	0	3	0	0	3	6	3	0	0	0	0	2	0	0
GbNAC091	1	5	0	0	0	0	5	0	0	1	4	1	0	0	1	0	0	0	0
GbNAC092	1	2	0	0	0	1	1	1	1	0	2	0	0	0	1	2	0	0	0
GbNAC093	0	0	0	0	1	0	7	0	0	0	0	2	0	0	0	0	1	0	1
GbNAC094	1	0	0	0	1	0	3	0	2	0	5	3	0	0	1	0	1	0	2
GbNAC095	0	0	0	0	0	0	0	0	0	0	3	2	0	0	0	1	0	1	0
GbNAC096	0	2	0	0	1	0	0	0	0	3	4	5	1	0	0	0	1	0	0
GbNAC097	0	2	0	0	0	0	2	0	0	0	2	4	0	0	0	1	0	0	2
GbNAC098	4	1	0	1	0	0	0	0	0	0	6	2	1	1	0	1	0	0	2
GbNAC099	0	0	0	0	0	0	4	0	1	1	2	2	0	1	0	0	0	0	1
GbNAC100	0	2	0	0	1	0	6	0	0	1	1	2	1	0	0	0	1	0	0
GbNAC101	4	2	0	0	1	0	4	0	0	1	0	0	0	0	0	0	1	0	1
GbNAC102	5	1	0	0	1	0	3	0	0	1	2	0	1	0	0	0	1	0	2
GbNAC103	1	2	0	0	0	0	3	0	0	0	1	3	0	1	0	0	0	0	1
GbNAC104	3	0	0	0	1	1	1	1	0	0	2	2	0	0	0	0	1	0	0
GbNAC105	2	1	0	0	0	0	5	0	2	0	3	0	0	1	0	0	0	0	1
GbNAC106	2	1	0	0	1	0	0	0	1	1	2	1	0	0	1	0	1	2	0
GbNAC107	1	1	0	0	1	0	1	0	0	0	1	2	0	0	0	1	1	1	1
GbNAC108	1	0	0	0	0	0	0	0	0	2	2	1	1	1	2	0	0	0	2
GbNAC109	1	1	0	0	1	1	1	0	2	0	2	2	1	0	0	1	1	0	0
GbNAC110	2	0	0	0	0	0	7	0	0	1	2	4	0	0	0	0	0	0	0
GbNAC111	3	0	0	0	0	0	1	0	0	0	5	2	0	2	0	0	0	0	1
GbNAC112	3	0	0	0	3	0	3	0	1	0	3	4	0	1	1	0	3	0	0
GbNAC113	0	1	0	0	2	0	2	0	0	1	1	1	0	0	0	0	2	0	2
GbNAC114	0	3	0	0	1	0	2	1	1	0	2	3	0	0	0	0	1	0	1
GbNAC115	2	2	0	0	0	0	0	0	0	2	2	2	0	0	1	0	0	1	3
GbNAC116	0	4	0	0	0	0	3	0	1	0	1	4	0	1	1	0	0	0	1
GbNAC117	2	1	0	0	0	0	5	1	0	1	3	2	0	1	0	0	0	0	0
GbNAC118	1	0	0	0	1	0	0	1	2	0	2	3	0	0	1	0	1	0	3
GbNAC119	2	2	0	0	1	0	0	0	0	0	5	3	1	0	0	0	1	2	0
GbNAC120	1	4	0	0	1	0	2	0	1	0	4	5	1	0	3	0	1	1	0
GbNAC121	2	0	0	0	0	0	1	0	0	0	3	0	1	0	2	2	0	0	0
GbNAC122	4	1	0	0	1	0	2	0	0	0	3	1	0	1	1	0	1	1	0
GbNAC123	1	2	0	0	3	0	2	0	0	0	2	0	0	0	0	1	3	0	0
GbNAC124	2	0	0	0	0	0	3	0	0	0	2	2	0	0	1	3	0	0	0
GbNAC125	5	0	0	0	2	0	1	0	2	0	2	0	1	0	1	0	2	0	0
GbNAC126	1	0	0	0	0	0	1	0	1	0	4	0	0	0	0	1	0	0	0
GbNAC127	0	0	1	0	2	0	1	0	1	0	2	3	1	0	1	0	2	0	0
GbNAC128	2	3	0	1	4	0	7	0	0	1	6	5	1	0	1	0	4	1	0
GbNAC129	0	1	0	0	1	0	1	0	0	0	2	4	0	0	1	1	1	0	2
GbNAC130	1	1	0	0	1	0	4	0	1	0	0	1	0	0	0	1	1	0	1
GbNAC131	2	5	0	1	0	0	2	0	0	0	2	3	0	0	0	0	0	0	1
GbNAC132	2	2	0	0	1	0	2	0	0	0	1	4	0	0	0	1	1	0	1
GbNAC133	0	1	0	0	0	0	1	0	0	0	0	4	0	0	0	0	0	2	1
GbNAC134	1	0	1	0	0	0	2	0	0	0	0	2	0	1	1	0	0	0	0
GbNAC135	5	0	0	0	1	0	1	0	0	0	2	0	0	0	0	0	1	0	0
GbNAC136	2	0	0	0	1	0	2	1	1	0	3	1	1	0	1	0	1	0	0
GbNAC137	2	3	0	0	2	0	4	0	0	2	5	1	0	1	1	0	2	0	1
GbNAC138	0	2	0	1	0	0	7	0	0	0	1	1	0	0	0	1	0	1	2
GbNAC139	0	2	0	1	2	0	1	0	0	0	3	2	1	0	0	0	2	0	0
GbNAC140	2	0	0	1	1	0	5	0	0	2	3	1	0	0	4	1	1	0	0
GbNAC141	1	0	0	0	0	0	0	0	0	0	1	6	0	0	0	0	0	0	0
GbNAC142	0	0	0	0	0	0	1	1	1	0	3	3	0	0	0	2	0	0	2
GbNAC143	9	3	0	0	1	2	3	0	0	0	1	5	1	0	0	0	1	1	0
GbNAC144	5	2	0	0	1	1	2	0	0	0	0	1	0	0	0	0	1	0	0
GbNAC145	0	1	1	1	0	0	4	0	1	1	2	3	1	0	0	0	0	1	1
GbNAC146	5	1	0	1	0	1	0	0	0	1	5	1	0	0	2	0	0	0	2
GbNAC147	0	0	0	0	0	0	1	0	0	1	2	1	0	0	0	0	0	0	0
GbNAC148	0	1	0	0	0	0	5	0	0	0	4	3	0	0	0	0	0	0	1
GbNAC149	0	0	0	0	1	0	5	0	1	0	3	5	1	0	0	0	1	0	1
GbNAC150	7	0	0	1	1	2	2	0	1	0	0	2	0	0	0	1	1	0	1
GbNAC151	1	1	0	1	1	0	2	0	0	0	4	3	0	0	0	0	0	0	0
GbNAC152	7	2	0	0	0	0	2	0	0	1	2	0	0	2	0	0	0	0	0
GbNAC153	2	1	0	0	0	0	0	0	0	0	2	4	0	0	0	0	0	0	0
GbNAC154	4	2	0	0	1	0	3	0	0	0	3	6	0	0	0	0	1	0	0
GbNAC155	0	1	0	0	1	0	2	0	1	0	2	2	0	0	0	0	1	0	1
GbNAC156	3	4	0	0	2	0	0	0	0	1	3	1	1	0	0	0	2	0	0
GbNAC157	1	1	0	0	1	0	4	0	0	1	0	5	0	0	1	2	1	1	1
GbNAC158	0	1	0	0	1	0	5	0	0	0	1	0	0	0	0	0	1	0	2
GbNAC159	2	4	0	1	1	0	0	0	1	3	6	3	0	0	0	1	1	0	0
GbNAC160	0	0	0	0	0	0	0	0	1	0	0	4	1	0	0	0	0	0	0
GbNAC161	0	1	0	0	0	0	2	0	1	0	1	1	0	1	0	0	0	1	1
GbNAC162	0	0	0	0	0	0	4	0	1	1	2	2	0	0	0	0	0	1	1
GbNAC163	0	0	0	1	0	0	1	0	1	0	4	3	0	0	0	1	0	0	1
GbNAC164	2	1	0	0	4	1	1	0	1	1	1	1	0	0	0	0	4	1	0
GbNAC165	2	0	1	0	0	0	3	0	0	1	2	0	1	0	0	0	0	0	0
GbNAC166	2	1	0	0	1	1	3	0	0	0	3	3	0	0	0	1	1	1	2
GbNAC167	1	1	0	0	1	0	3	0	0	1	1	2	0	0	0	0	1	0	1
GbNAC168	0	1	0	0	0	0	4	0	0	0	0	5	0	0	0	0	0	0	2
GbNAC169	1	2	0	1	0	0	3	1	1	1	2	2	0	0	2	0	0	0	2
GbNAC170	2	1	0	0	1	0	3	0	1	1	1	4	0	0	2	0	1	1	2
GbNAC171	3	3	0	1	0	0	1	0	1	1	2	3	1	0	1	0	0	1	1
GbNAC172	3	2	0	0	1	0	0	1	1	1	2	1	1	1	0	0	1	0	0
GbNAC173	1	3	0	1	0	0	2	0	0	0	1	2	0	0	0	0	0	0	0
GbNAC174	1	1	0	0	0	0	5	0	0	0	1	3	0	0	0	0	0	0	1
GbNAC175	1	2	1	1	1	0	2	0	0	0	0	2	0	0	1	0	1	0	1
GbNAC176	5	2	0	0	1	0	6	0	0	1	0	4	0	1	0	1	1	0	0
GbNAC177	2	1	0	0	3	0	3	0	4	0	1	2	0	0	1	0	3	0	1
GbNAC178	1	1	0	1	2	0	4	0	1	0	2	3	0	0	0	1	2	0	0
GbNAC179	0	0	0	0	2	1	4	0	0	1	2	3	1	1	2	0	2	0	1
GbNAC180	7	1	1	0	0	1	4	0	0	1	2	1	0	0	0	2	0	0	1
GbNAC181	4	2	0	0	1	0	1	0	0	1	3	2	0	1	0	0	1	0	1
GbNAC182	7	0	0	0	4	0	1	0	1	1	1	2	0	0	1	0	4	2	1
GbNAC183	7	1	0	1	1	0	5	0	0	1	0	2	0	0	2	0	1	0	1
GbNAC184	3	3	0	0	0	0	0	0	0	1	4	1	0	2	0	1	0	0	1
GbNAC185	3	1	0	0	0	0	1	0	0	1	2	4	0	0	0	0	0	0	0
GbNAC186	1	1	0	0	0	0	0	0	1	0	2	3	1	0	1	0	0	0	2
GbNAC187	1	1	0	0	1	0	1	0	1	1	0	2	0	0	0	1	1	0	0
GbNAC188	1	3	0	0	0	0	3	0	0	0	1	1	1	0	0	0	0	0	0
GbNAC189	1	4	0	0	1	0	1	0	0	0	1	1	0	0	0	0	1	0	1
GbNAC190	0	2	0	0	1	0	1	0	0	0	2	1	1	0	2	0	1	0	2
GbNAC191	3	1	0	0	0	1	0	1	1	3	3	3	0	0	0	1	0	0	0
GbNAC192	0	1	0	0	1	0	0	0	0	2	4	4	0	0	1	0	1	1	0
GbNAC193	0	1	0	0	0	0	2	0	1	0	2	0	0	1	0	0	0	0	0
GbNAC194	2	3	0	0	0	0	6	0	0	0	1	1	2	1	0	0	0	0	1
GbNAC195	0	2	0	0	0	0	3	0	0	0	0	0	0	0	1	0	0	0	0
GbNAC196	3	0	0	0	2	0	3	0	0	3	5	3	0	0	0	0	2	1	0
GbNAC197	0	1	0	0	0	0	0	0	0	1	1	1	0	2	0	1	0	0	0
GbNAC198	3	0	0	0	3	0	0	0	0	0	2	2	0	0	2	0	3	0	0
GbNAC199	0	1	1	0	0	0	3	1	0	0	1	0	0	0	1	1	0	1	0
GbNAC200	2	2	0	1	1	0	1	0	0	1	4	2	0	0	1	2	1	0	1
GbNAC201	2	1	1	0	0	1	2	0	0	1	4	3	1	1	0	0	0	1	0
GbNAC202	0	2	0	0	3	0	2	0	0	0	1	2	0	0	2	0	3	0	2
GbNAC203	4	3	0	0	0	0	1	0	0	0	4	2	1	0	1	0	0	1	0
GbNAC204	1	2	1	0	2	0	1	0	0	1	3	3	0	0	1	0	2	2	0
GbNAC205	0	2	0	0	1	0	6	0	2	0	1	2	0	0	0	1	1	0	0
GbNAC206	0	1	0	0	1	0	0	0	0	1	5	0	0	1	0	0	1	0	3
GbNAC207	2	3	0	0	3	0	2	0	1	0	2	1	1	0	0	0	3	0	0
GbNAC208	1	0	0	1	0	0	6	0	1	0	3	2	0	0	0	1	0	0	0
GbNAC209	0	2	0	1	1	0	0	0	0	0	0	0	0	0	0	1	1	0	0
GbNAC210	1	1	0	0	2	0	0	0	1	0	2	5	2	1	0	0	2	1	0
GbNAC211	2	4	0	1	0	0	1	0	0	1	1	2	0	0	0	1	0	3	0
GbNAC212	1	1	0	0	1	0	5	0	0	0	2	0	0	0	0	0	1	1	0
GbNAC213	0	1	0	1	2	0	2	0	0	1	2	1	0	0	0	1	2	0	2
GbNAC214	0	1	0	0	1	0	0	0	1	0	2	1	0	0	0	2	1	0	0
GbNAC215	1	1	0	0	1	1	0	0	0	1	1	3	1	0	2	0	1	0	0
GbNAC216	1	2	0	1	1	0	0	0	0	0	1	1	0	0	1	0	1	0	1
GbNAC217	1	0	0	0	0	0	1	0	0	0	2	2	0	0	1	1	0	1	0
GbNAC218	1	1	0	0	1	0	2	0	0	0	3	6	0	0	1	1	1	0	0
GbNAC219	0	2	0	0	0	0	1	0	0	0	4	5	0	0	1	0	0	0	0
GbNAC220	0	2	0	0	1	0	1	0	0	2	2	2	0	0	0	0	1	0	0
GbNAC221	2	6	0	0	2	0	2	0	0	2	6	3	0	0	1	0	2	0	0
GbNAC222	2	3	0	0	1	0	1	0	1	0	3	4	0	0	0	0	1	0	1
GbNAC223	0	0	0	0	1	0	1	0	0	0	1	2	0	0	0	0	1	0	0
GbNAC224	8	0	1	0	0	0	5	0	0	0	2	3	0	0	1	0	0	0	3
GbNAC225	0	2	0	0	0	0	3	0	0	0	2	1	1	0	0	0	0	0	0
GbNAC226	1	2	0	0	1	0	3	0	0	0	0	3	0	0	0	0	1	0	0
GbNAC227	0	1	0	0	1	0	1	0	0	2	2	5	1	0	0	0	1	0	0
GbNAC228	4	0	0	1	0	0	2	0	1	0	5	2	1	1	0	1	0	0	1
GbNAC229	0	1	0	0	0	0	4	0	0	0	2	4	1	0	0	1	0	0	1
GbNAC230	0	2	0	0	1	0	1	0	0	1	2	2	0	0	0	0	1	0	0
GbNAC231	0	0	0	0	1	0	10	0	0	0	0	0	0	0	0	0	1	0	1
GbNAC232	2	1	0	0	1	0	4	0	0	0	1	2	0	0	0	0	1	0	0
GbNAC233	2	0	0	0	0	0	2	0	1	0	0	0	1	0	1	0	0	0	1
GbNAC234	3	1	0	0	2	0	0	0	0	1	0	2	0	1	0	0	2	0	1
GbNAC235	2	1	1	0	1	0	2	0	0	0	0	6	1	1	0	0	1	0	0
GbNAC236	1	4	0	0	1	0	0	0	1	0	1	0	0	0	0	1	1	0	2
GbNAC237	3	0	0	0	1	1	1	1	0	1	3	3	0	0	0	1	1	0	0
GbNAC238	2	0	0	0	0	0	5	0	2	0	1	0	1	1	1	0	0	0	0
GbNAC239	2	2	0	0	1	1	0	0	1	0	2	1	0	0	0	0	1	1	0
GbNAC240	2	0	0	0	3	0	0	0	0	1	0	1	0	0	1	1	3	1	0
GbNAC241	2	2	0	0	0	0	1	0	0	1	3	3	1	1	2	0	0	0	1
GbNAC242	0	3	0	1	0	0	4	0	0	0	0	2	1	0	0	0	0	0	1
GbNAC243	0	1	0	0	0	0	3	0	0	1	2	6	0	0	0	0	0	0	1
GbNAC244	2	0	0	0	0	0	0	0	0	0	3	4	0	2	0	0	0	0	2
GbNAC245	3	1	0	0	3	0	2	0	1	0	3	2	0	1	1	1	3	0	1
GbNAC246	0	1	0	0	1	0	3	0	0	1	2	1	1	1	0	0	1	1	0
GbNAC247	2	3	0	0	1	0	1	1	0	0	3	3	0	0	0	0	1	0	2
GbNAC248	3	3	0	0	1	0	0	0	0	1	2	2	0	0	1	0	1	0	1
GbNAC249	0	3	0	0	0	0	4	0	1	0	1	4	1	1	1	0	0	0	1
GbNAC250	2	2	0	0	0	0	2	0	0	0	2	3	0	1	1	0	0	0	0
GbNAC251	0	0	1	0	0	0	0	0	0	1	3	3	0	0	1	0	0	0	1
GbNAC252	0	3	0	0	0	0	1	0	0	1	5	2	0	0	1	1	0	0	0
GbNAC253	1	3	0	0	2	0	1	0	1	0	3	3	1	0	0	0	2	1	0
GbNAC254	1	0	0	0	0	0	4	0	0	1	1	1	1	0	0	1	0	0	0
GbNAC255	2	2	0	0	0	1	0	0	0	0	2	1	0	0	0	0	0	0	1
GbNAC256	0	0	0	0	2	0	1	0	3	0	4	1	0	1	0	2	2	0	0
GbNAC257	1	0	1	0	0	0	4	0	0	0	0	4	0	0	1	0	0	0	0
GbNAC258	0	1	0	0	0	0	1	0	2	0	1	3	1	1	0	0	0	0	0
GbNAC259	0	0	0	0	2	0	0	0	0	0	0	3	1	0	0	0	2	0	0
GbNAC260	1	2	0	1	4	0	5	0	0	0	4	5	0	0	0	0	4	2	0
GbNAC261	4	0	0	0	1	0	2	1	0	1	5	1	3	0	0	2	1	0	1
GbNAC262	1	0	1	0	0	0	3	0	1	0	3	1	0	0	0	1	0	0	0
GbNAC263	1	1	0	0	1	0	1	0	0	0	0	1	0	0	0	0	1	0	0
GbNAC264	2	3	0	1	0	0	0	1	0	0	3	2	0	0	0	2	0	0	1
GbNAC265	0	3	0	0	0	0	0	0	0	1	0	3	0	0	0	0	0	0	1
GbNAC266	0	1	0	0	0	0	0	0	0	0	0	4	0	0	0	0	0	1	1
GbNAC267	1	0	0	0	0	0	2	1	0	0	1	3	0	1	1	0	0	0	0
GbNAC268	5	1	0	0	1	0	1	0	0	1	1	0	0	0	0	0	1	0	0
GbNAC269	2	1	0	0	2	0	1	0	1	0	4	1	1	0	1	1	2	0	0
GbNAC270	1	3	0	0	0	0	2	0	0	1	6	1	0	0	1	0	0	1	1
ABRE: cis-acting element involved in the abscisic acid responsiveness
ARE: cis-acting regulatory element essential for the anaerobic induction
AT-rich sequence: element for maximal elicitor-mediated activation (2copies)
AuxRR-core: cis-acting regulatory element involved in auxin responsiveness
CGTCA-motif: cis-acting regulatory element involved in the MeJA-responsiveness
DRE: cis-acting regulatory element involved in cold stress
ERE: Ethylene-responsive element
GARE-motif: gibberellin-responsive element
LTR: cis-acting element involved in low-temperature responsiveness
MBS: MYB binding site involved in drought-inducibility
MYB: cis-acting element involved in abscisic acid responsiveness and dehydration stress
MYC: cis-acting regulatory element involved in abscisic acid responsiveness and cold stress
P-box: gibberellin-responsive element
TATC-box: cis-acting element involved in gibberellin-responsiveness
TCA-element: cis-acting element involved in salicylic acid responsiveness
TC-rich repeats: cis-acting element involved in defense and stress responsiveness
TGACG-motif: cis-acting regulatory element involved in the MeJA-responsiveness
TGA-element : auxin-responsive element
WUN-motif: wound-responsive element
62 GbNAC genes differentially expressed were highlighted with light green color.
